# Supplementary material for: Synthesis and Antiviral Properties of Camphor-Derived Iminothiazolidine-4-Ones and 2,3-Dihydrothiazoles
Source: MDPI journal article supplement (doi:10.3390/molecules27154761), 2022-07-25

# Synthesis and Antiviral Properties of Camphor-Derived Iminothiazolidine-4-Ones and 2,3-Dihydrothiazoles

Vladislav V. Oreshko <sup>1,2</sup>, Kseniya S. Kovaleva <sup>1</sup>, Ekaterina D. Mordvinova <sup>2,3</sup>, Olga I. Yarovaya <sup>1,2,\*</sup>, Yuri V. Gatilov <sup>1</sup>, Dmitry N. Shcherbakov <sup>3</sup>, Nikolai I. Bormotov <sup>3</sup>, Olga A. Serova <sup>3</sup>, Larisa N. Shishkina <sup>3</sup> and Nariman F. Salakhutdinov <sup>1</sup>

<sup>1</sup> Department of Medicinal Chemistry, N. N. Vorozhtsov Novosibirsk Institute of Organic Chemistry, Siberian Branch of the Russian Academy of Sciences, Lavrentiev Ave. 9, 630090 Novosibirsk, Russia; vladoreshko28121999@gmail.com (V.V.O.); kseniya.kovaleva3103@yandex.ru (K.S.K.); gatilov@nioch.nsc.ru (Y.V.G.); anvar@nioch.nsc.ru (N.F.S.)

<sup>2</sup> Zelman Institute for Medicine and Psychology, Novosibirsk State University, Pirogova St., 1, 630090 Novosibirsk, Russia; mordvinova97@mail.ru

<sup>3</sup> State Research Center of Virology and Biotechnology VECTOR, Rospotrebnadzor, 630559 Koltsovo, Russia; dnshcherbakov@gmail.com (D.N.S.); bormotov\_ni@vector.nsc.ru (N.I.B.); serova.olga.a@yandex.ru (O.A.S.); shish@vector.nsc.ru (L.N.S.)

\* Correspondence: ooo@nioch.nsc.ru; Tel.: +7-383-330-88-70

## Table of content

|                                                                                |    |
|--------------------------------------------------------------------------------|----|
| 1. <sup>1</sup> H NMR and <sup>13</sup> C NMR spectra of compounds 2a-8d ..... | 2  |
| 2. High Resolution Mass Spectra of Compounds 2a-8d .....                       | 38 |

# 1. $^1\text{H}$ NMR and $^{13}\text{C}$ NMR spectra of compounds 2a-8d

## 1.1. $^1\text{H}$ NMR and $^{13}\text{C}$ NMR spectra of compound 2a

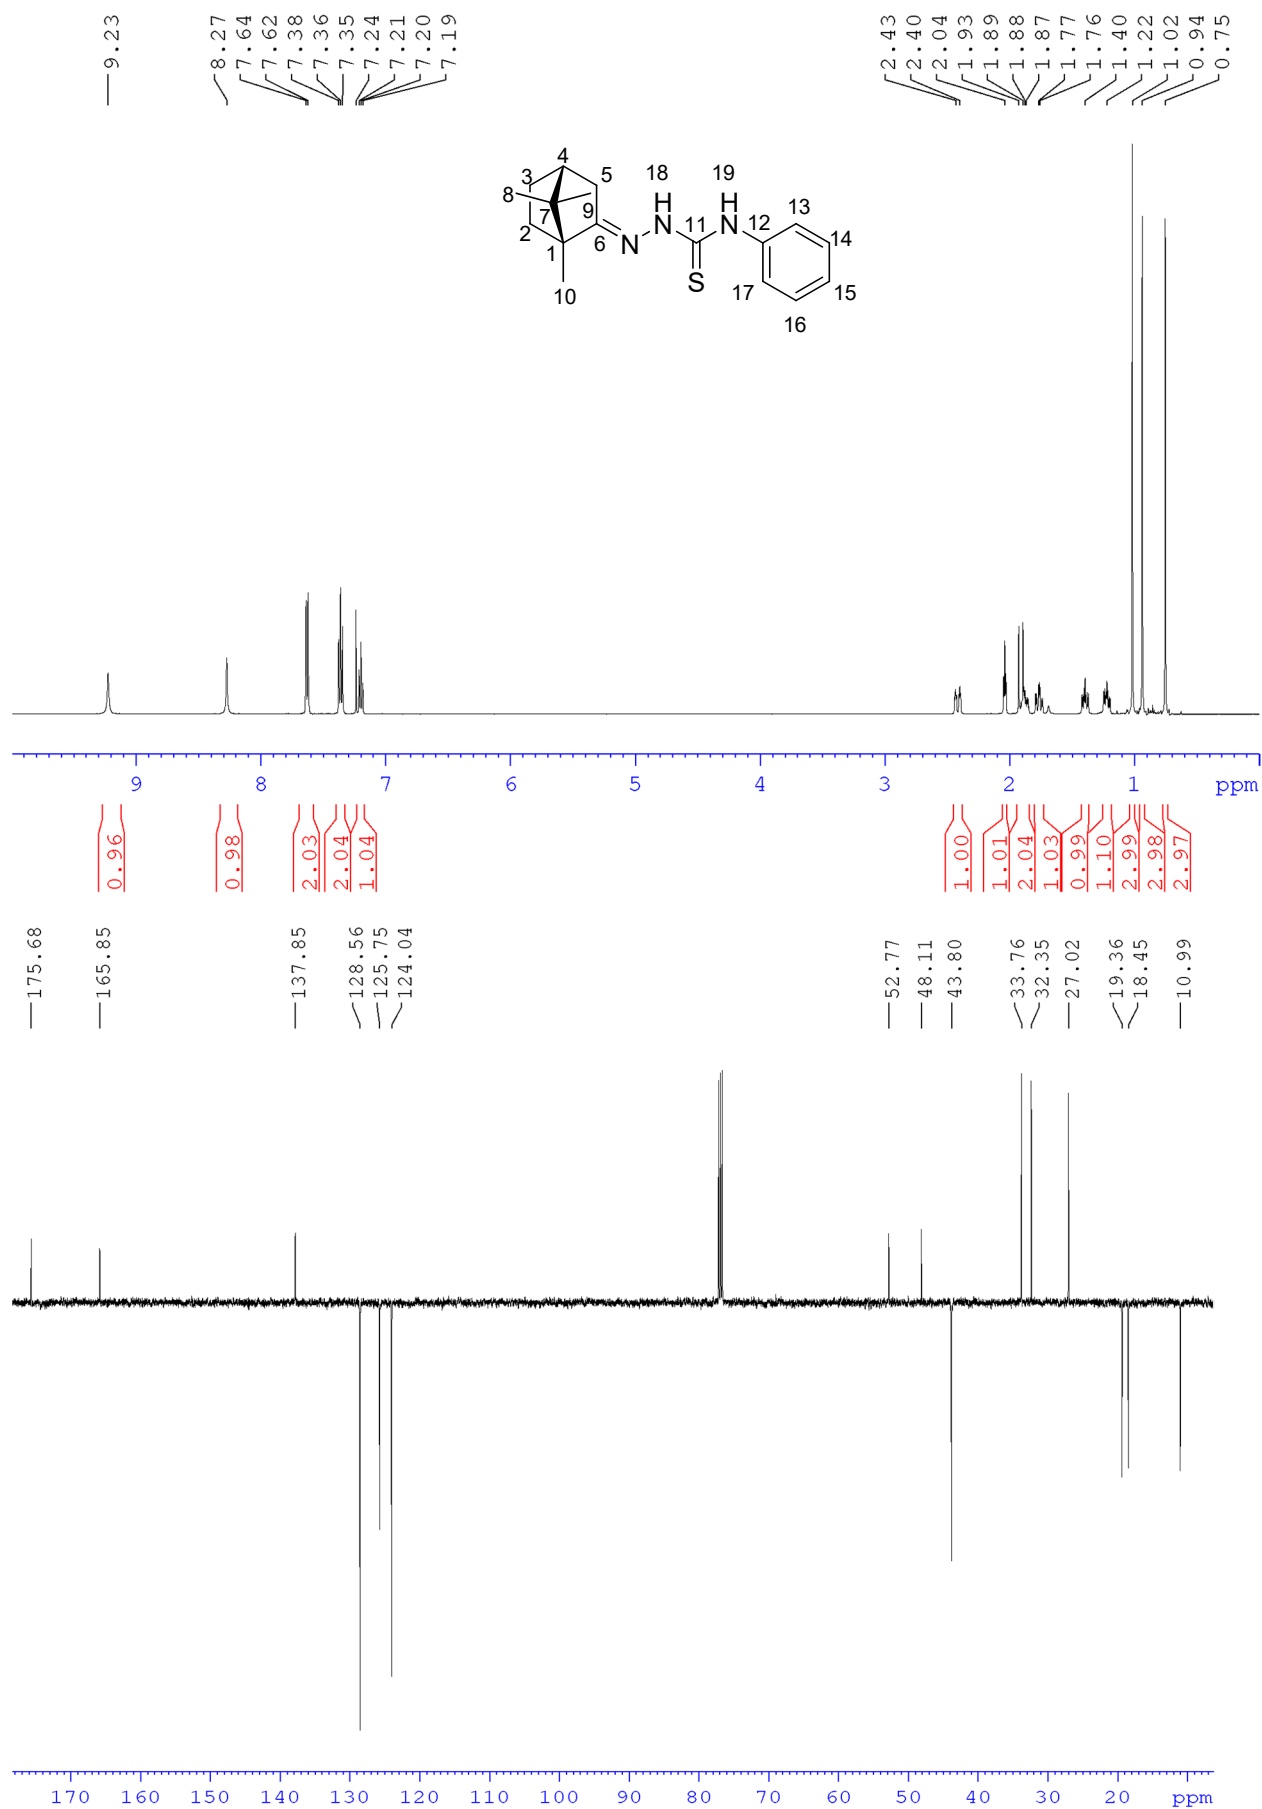

1.2.  $^1\text{H}$  NMR and  $^{13}\text{C}$  NMR spectra of compound 2b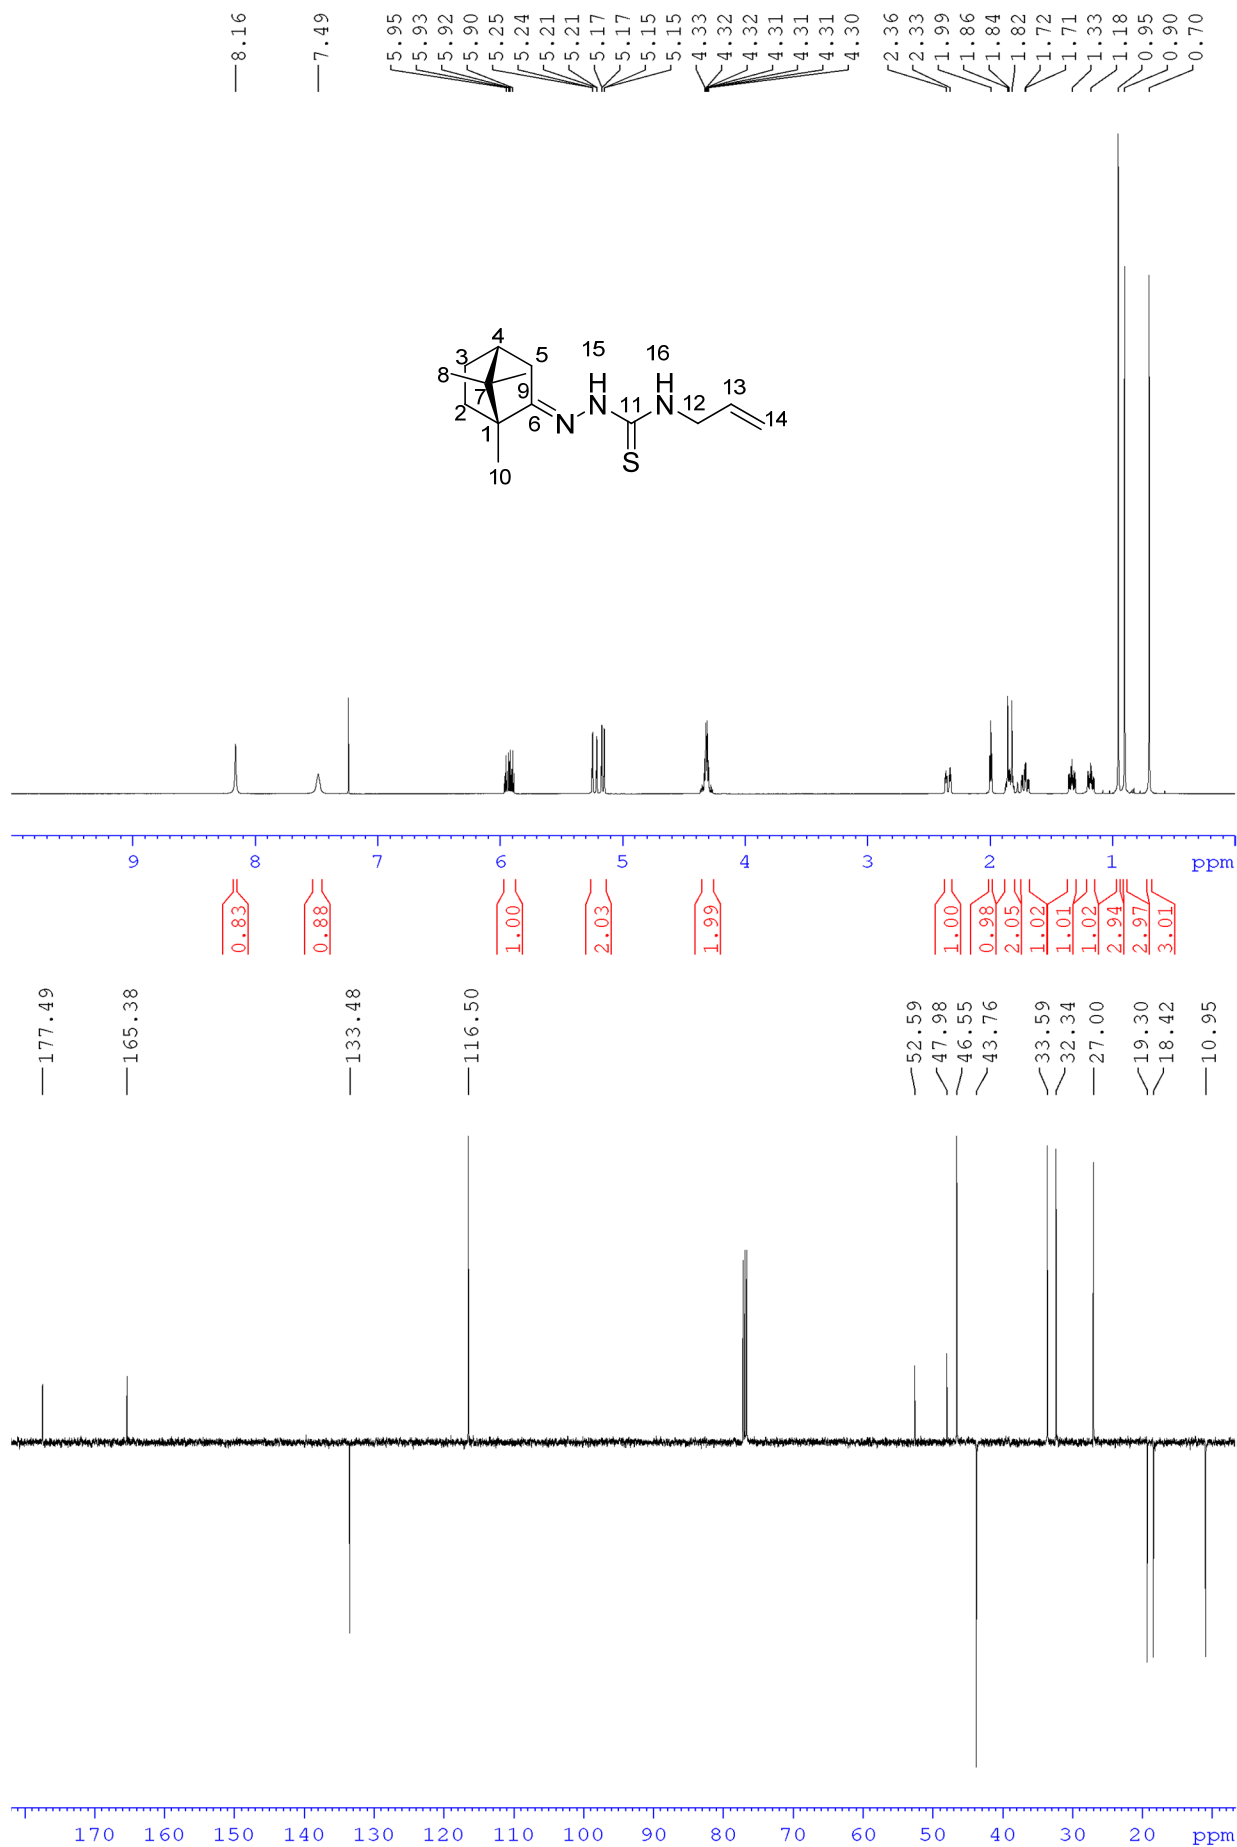

1.3.  $^1\text{H}$  NMR and  $^{13}\text{C}$  NMR spectra of compound 2c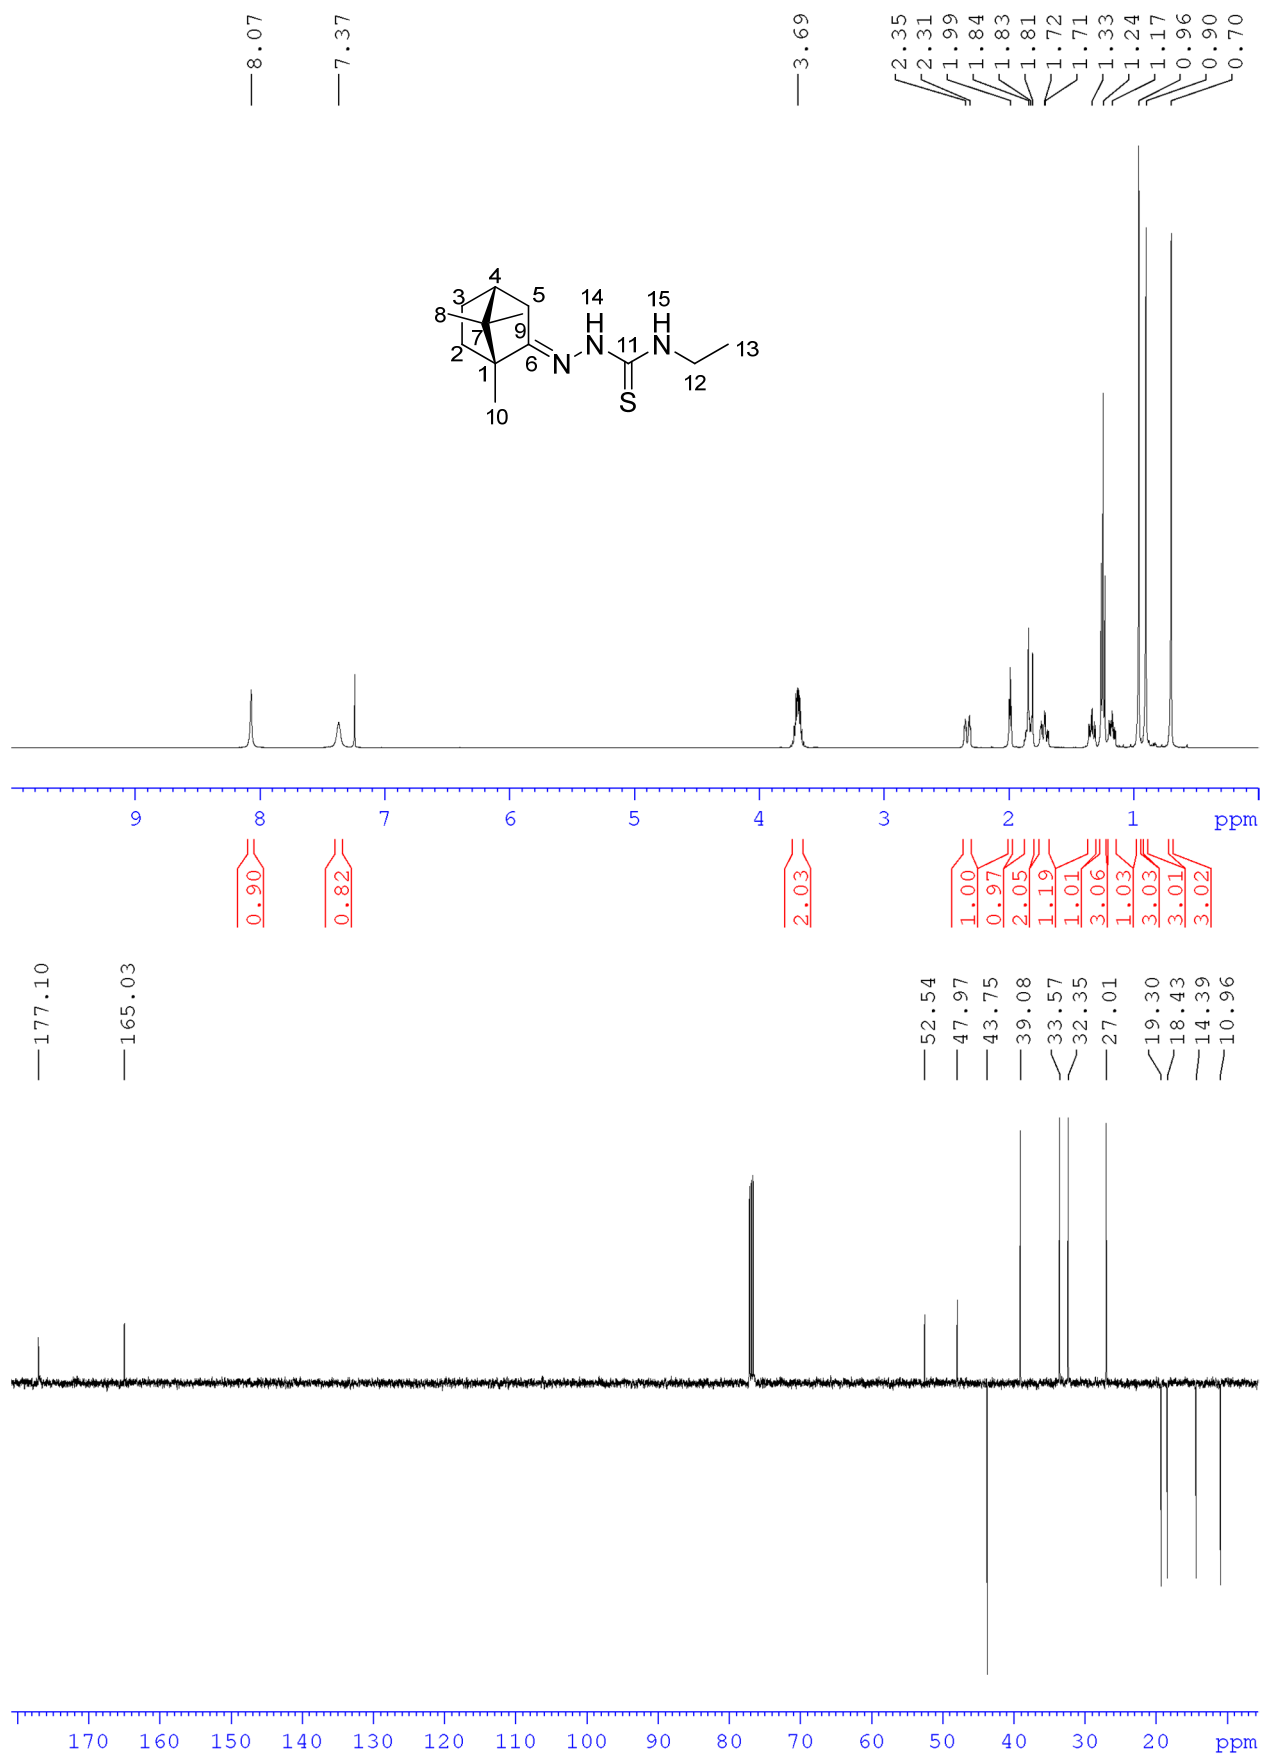

1.4.  $^1\text{H}$  NMR and  $^{13}\text{C}$  NMR spectra of compound 2d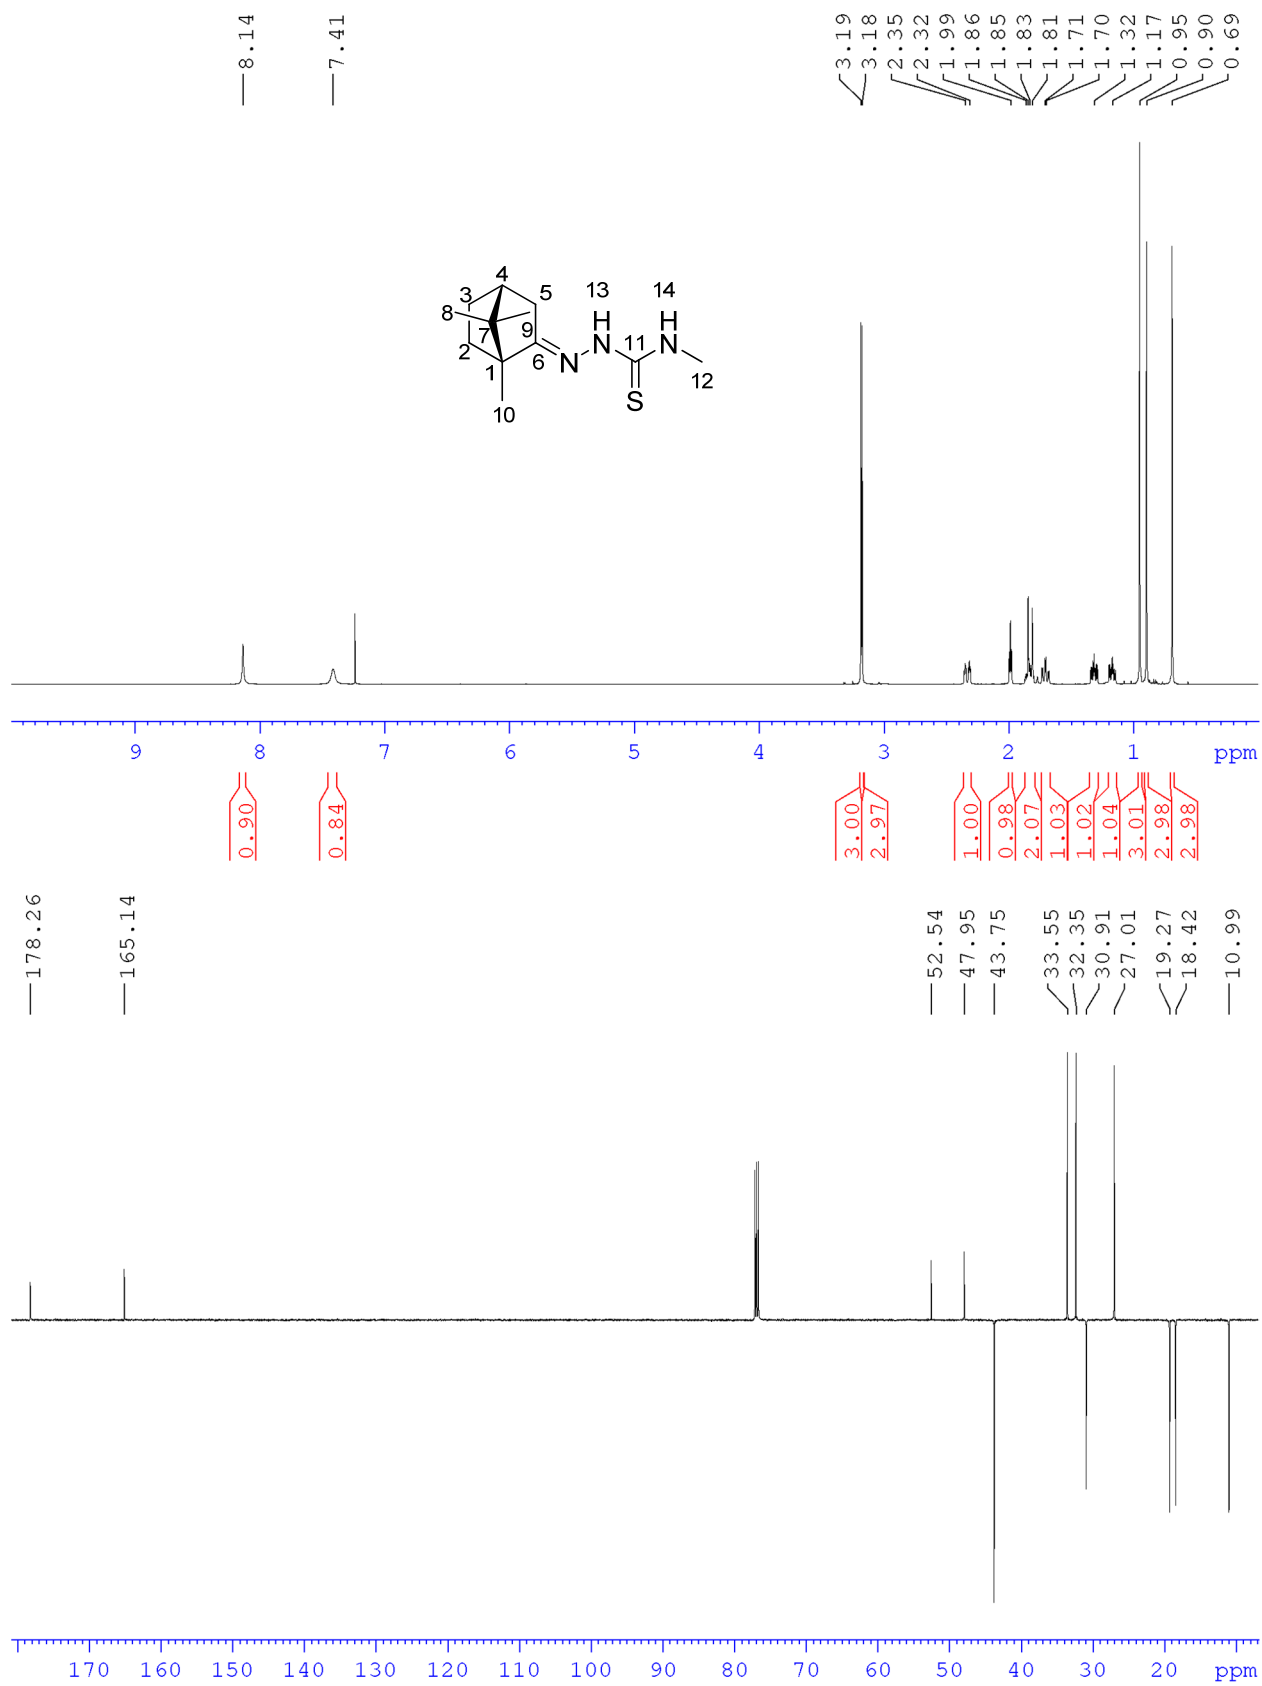

1.5.  $^1\text{H}$  NMR and  $^{13}\text{C}$  NMR spectra of compound 2'a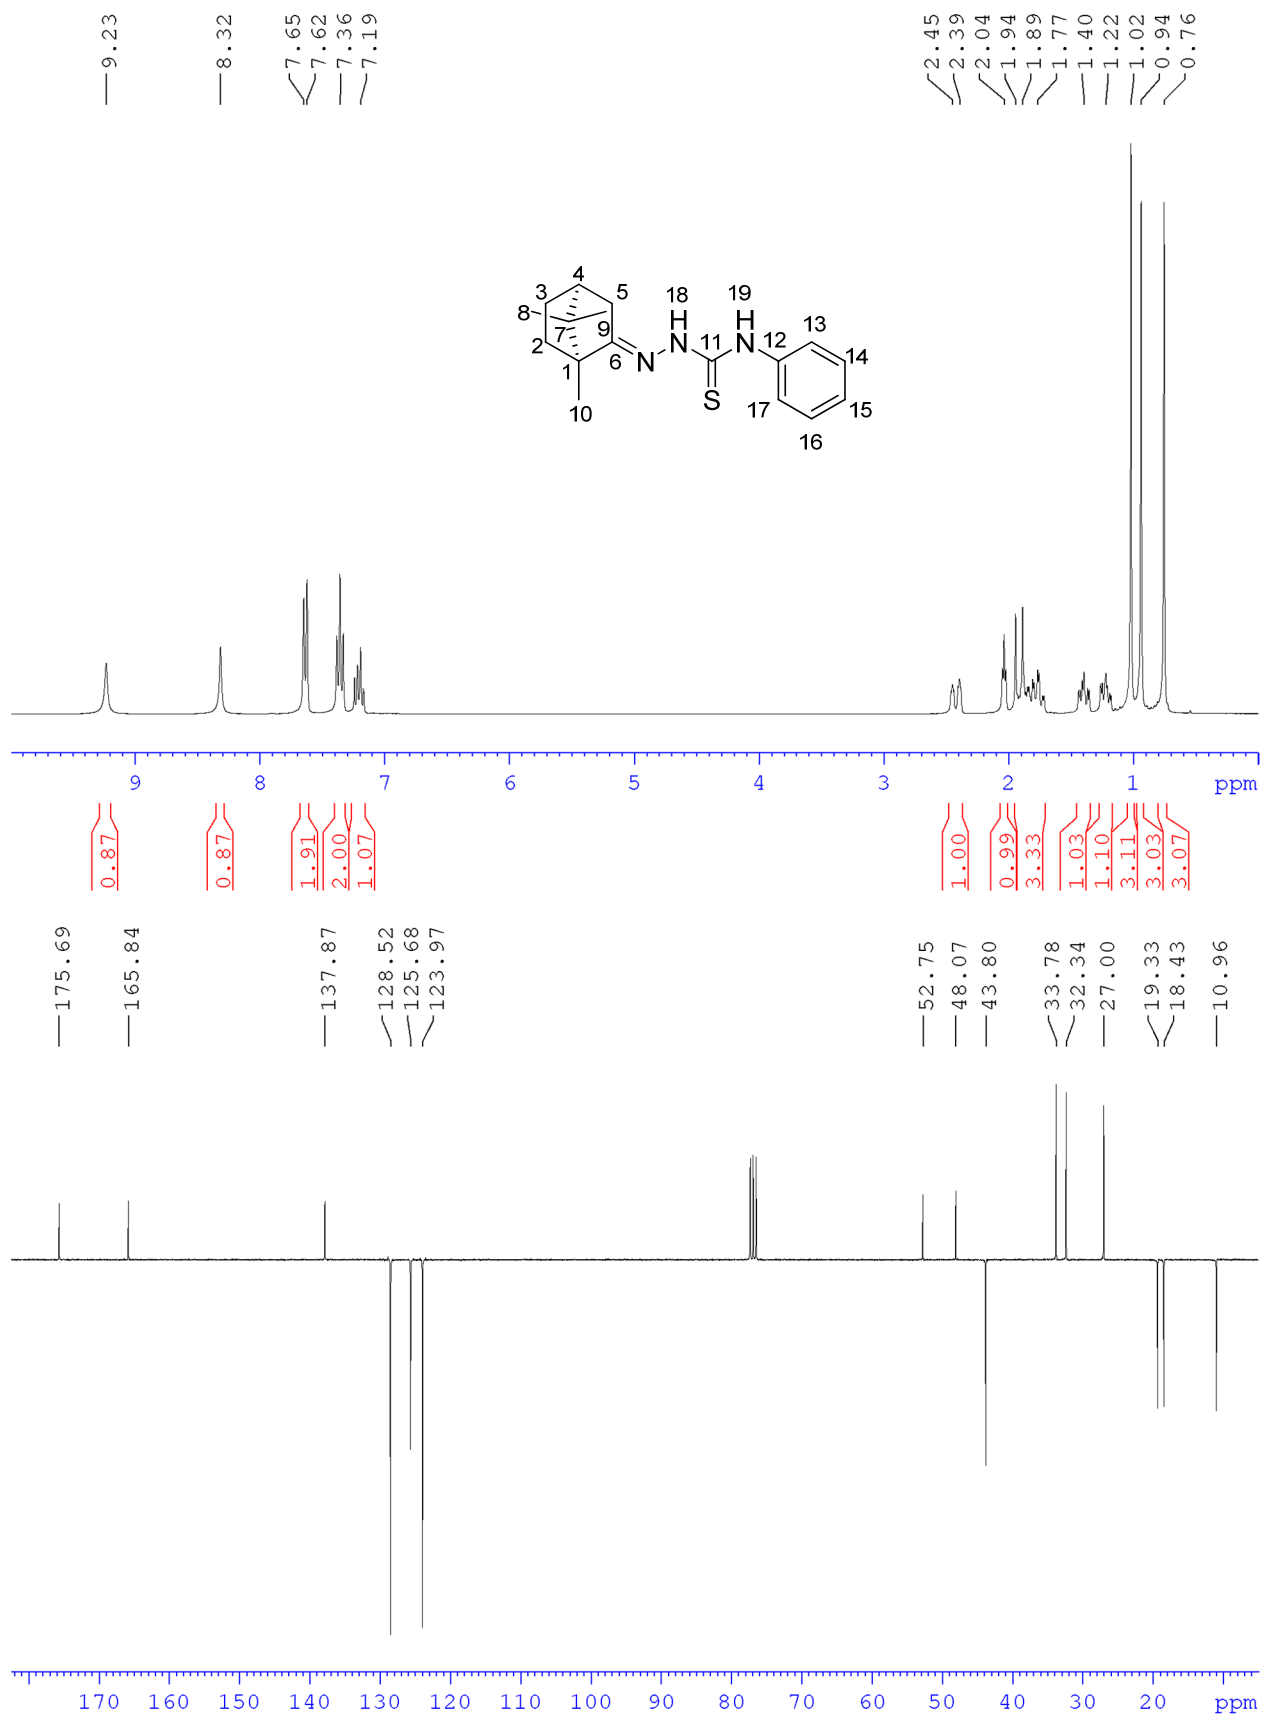

1.6.  $^1\text{H}$  NMR and  $^{13}\text{C}$  NMR spectra of compound 2'b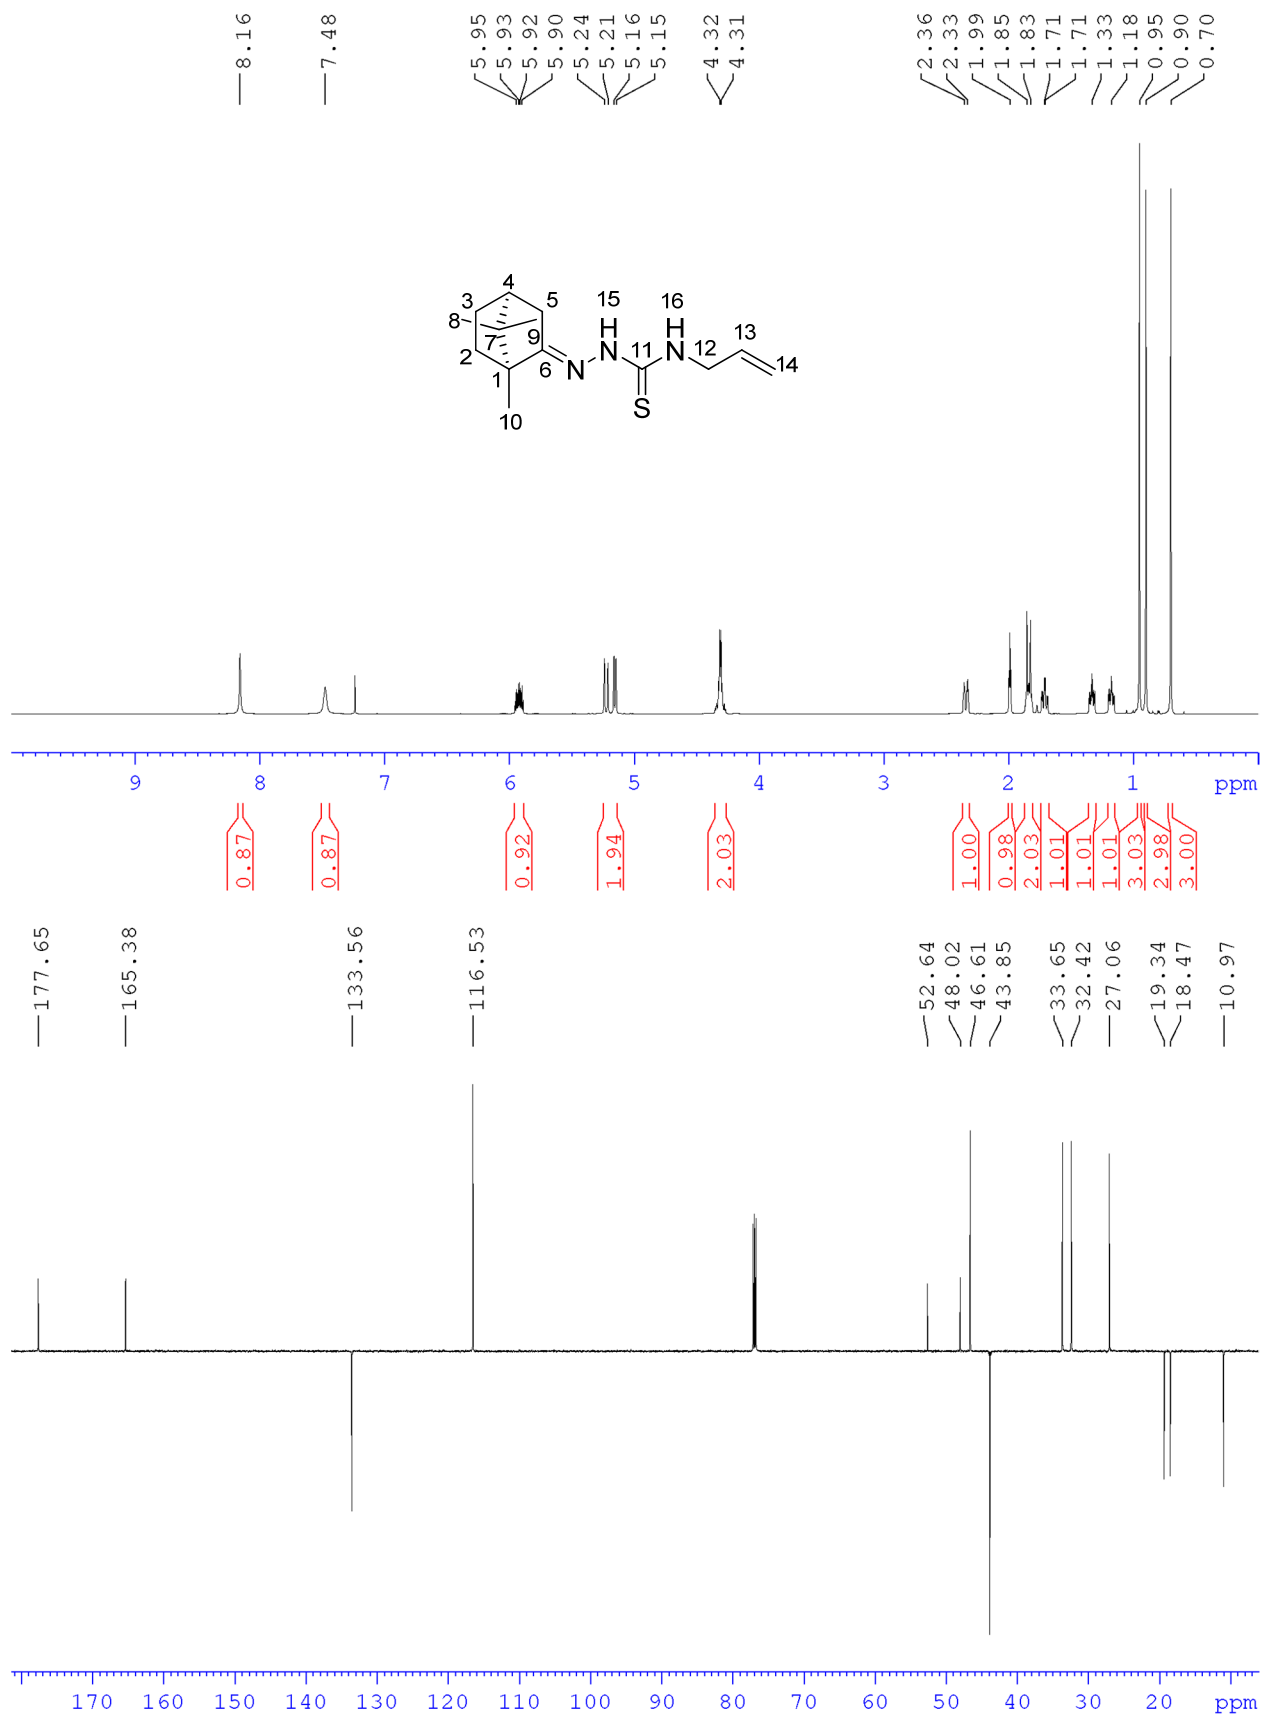

### 1.7. <sup>1</sup>H NMR and <sup>13</sup>C NMR spectra of compound 2'c

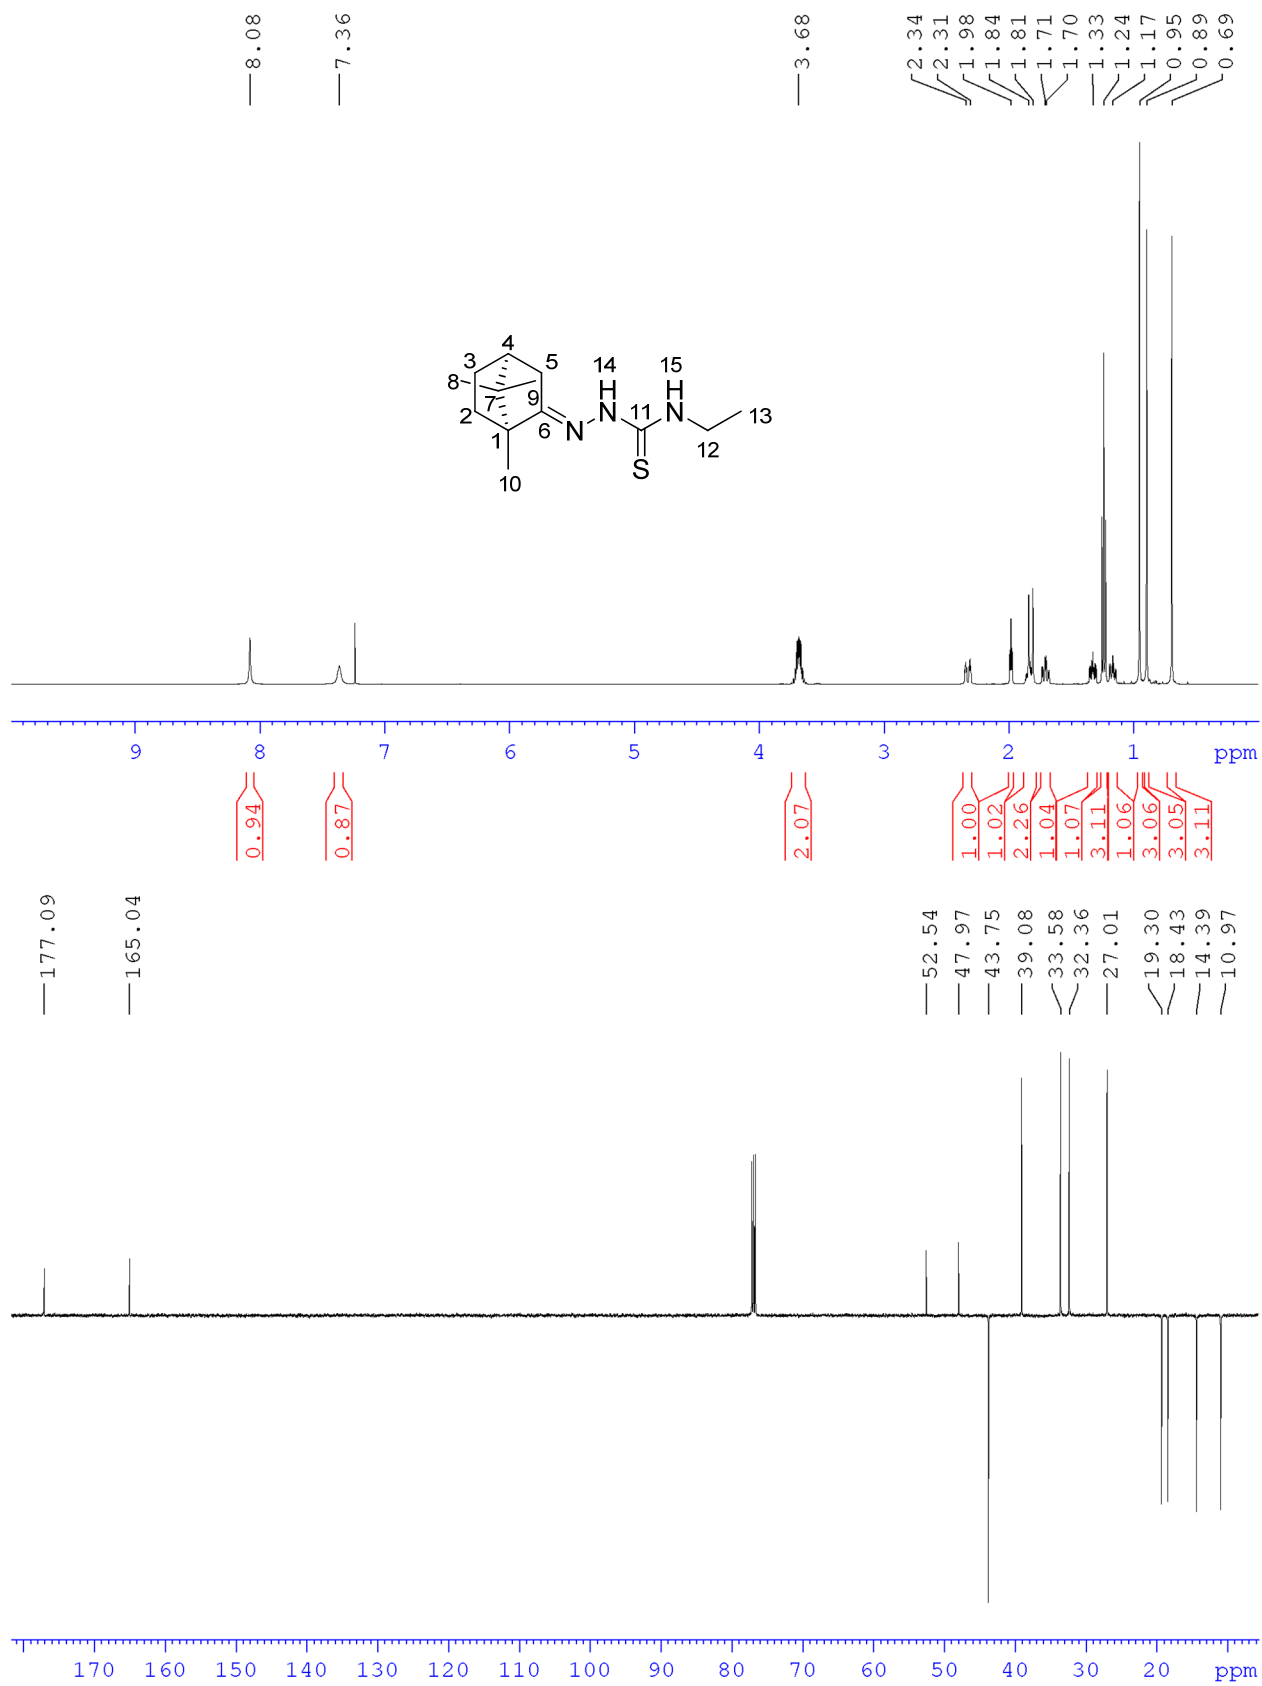



1.8.  $^1\text{H}$  NMR and  $^{13}\text{C}$  NMR spectra of compound 2'd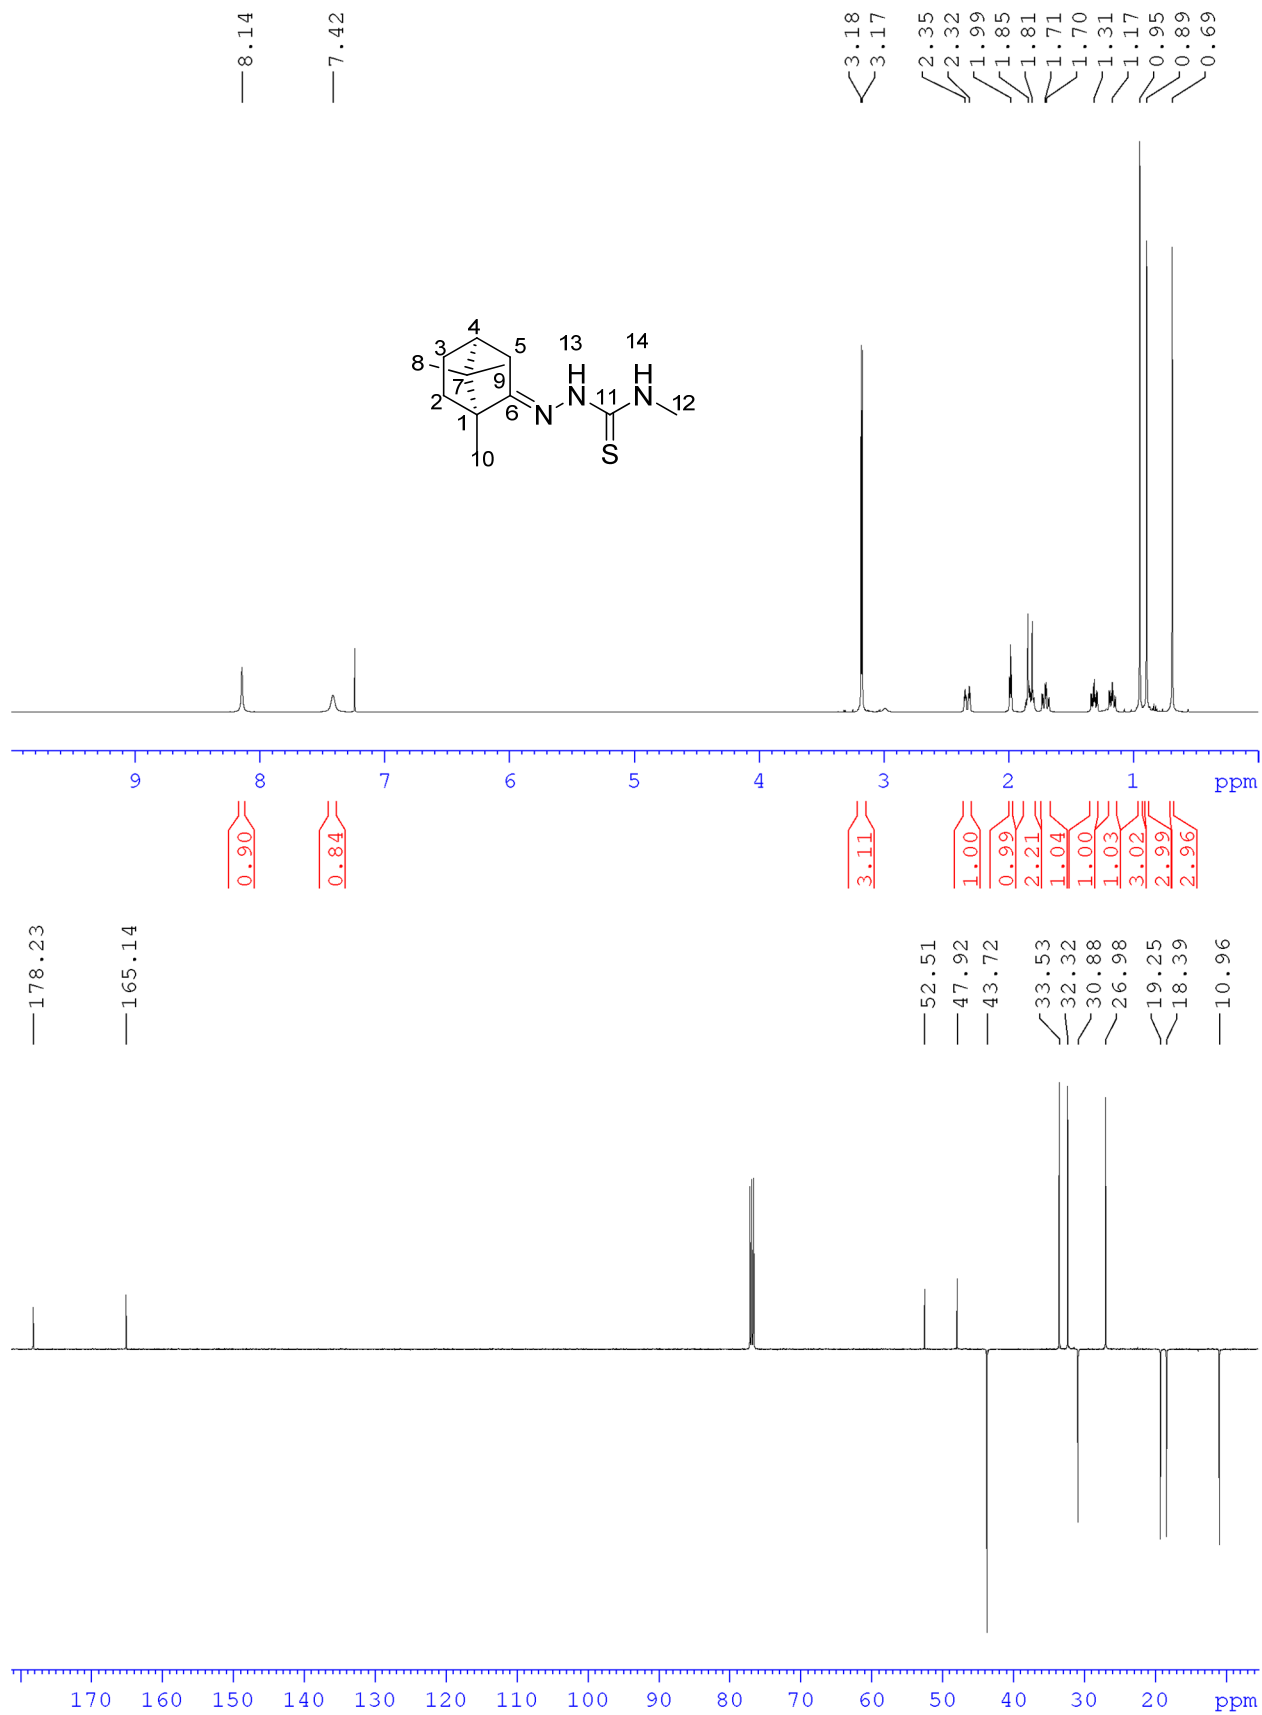

1.9.  $^1\text{H}$  NMR and  $^{13}\text{C}$  NMR spectra of compound 3a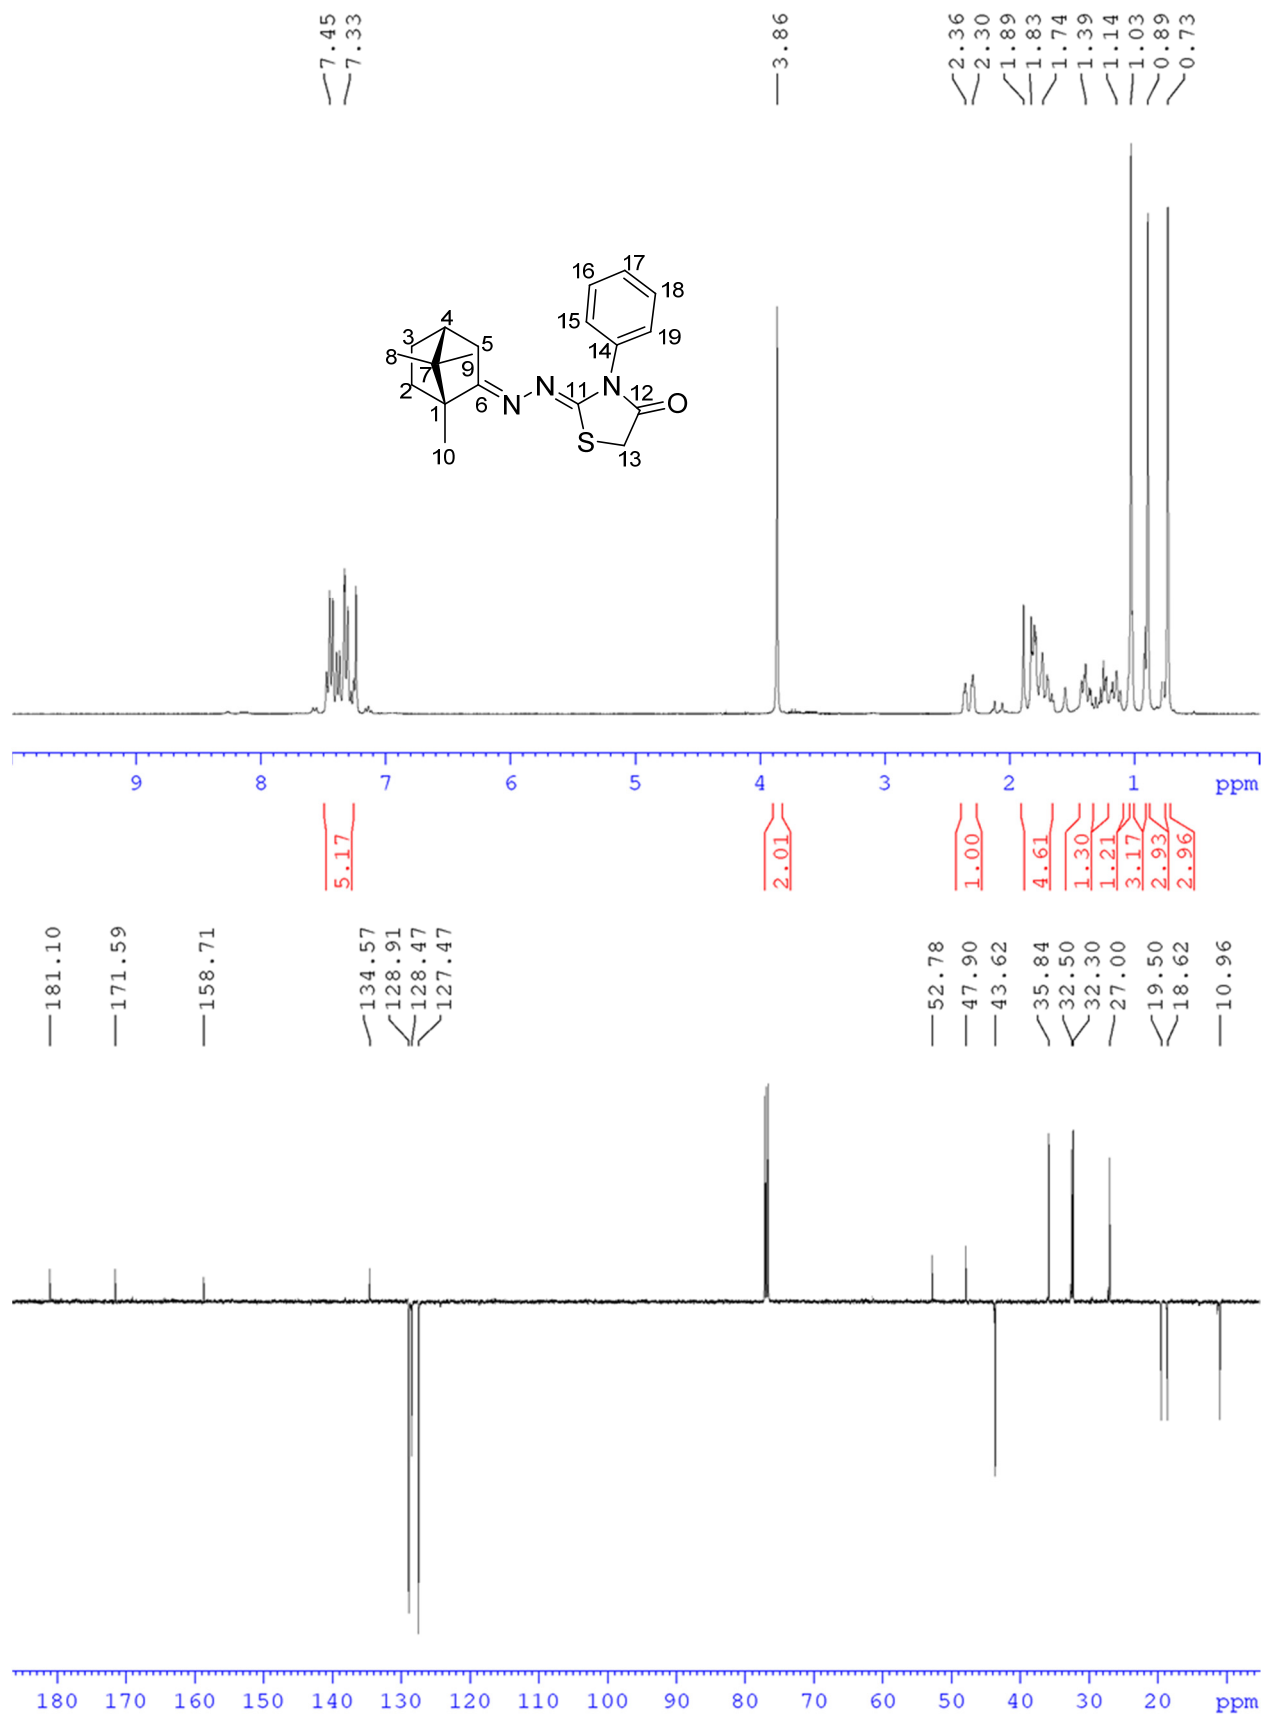

1.10.  $^1\text{H}$  NMR and  $^{13}\text{C}$  NMR spectra of compound **3b**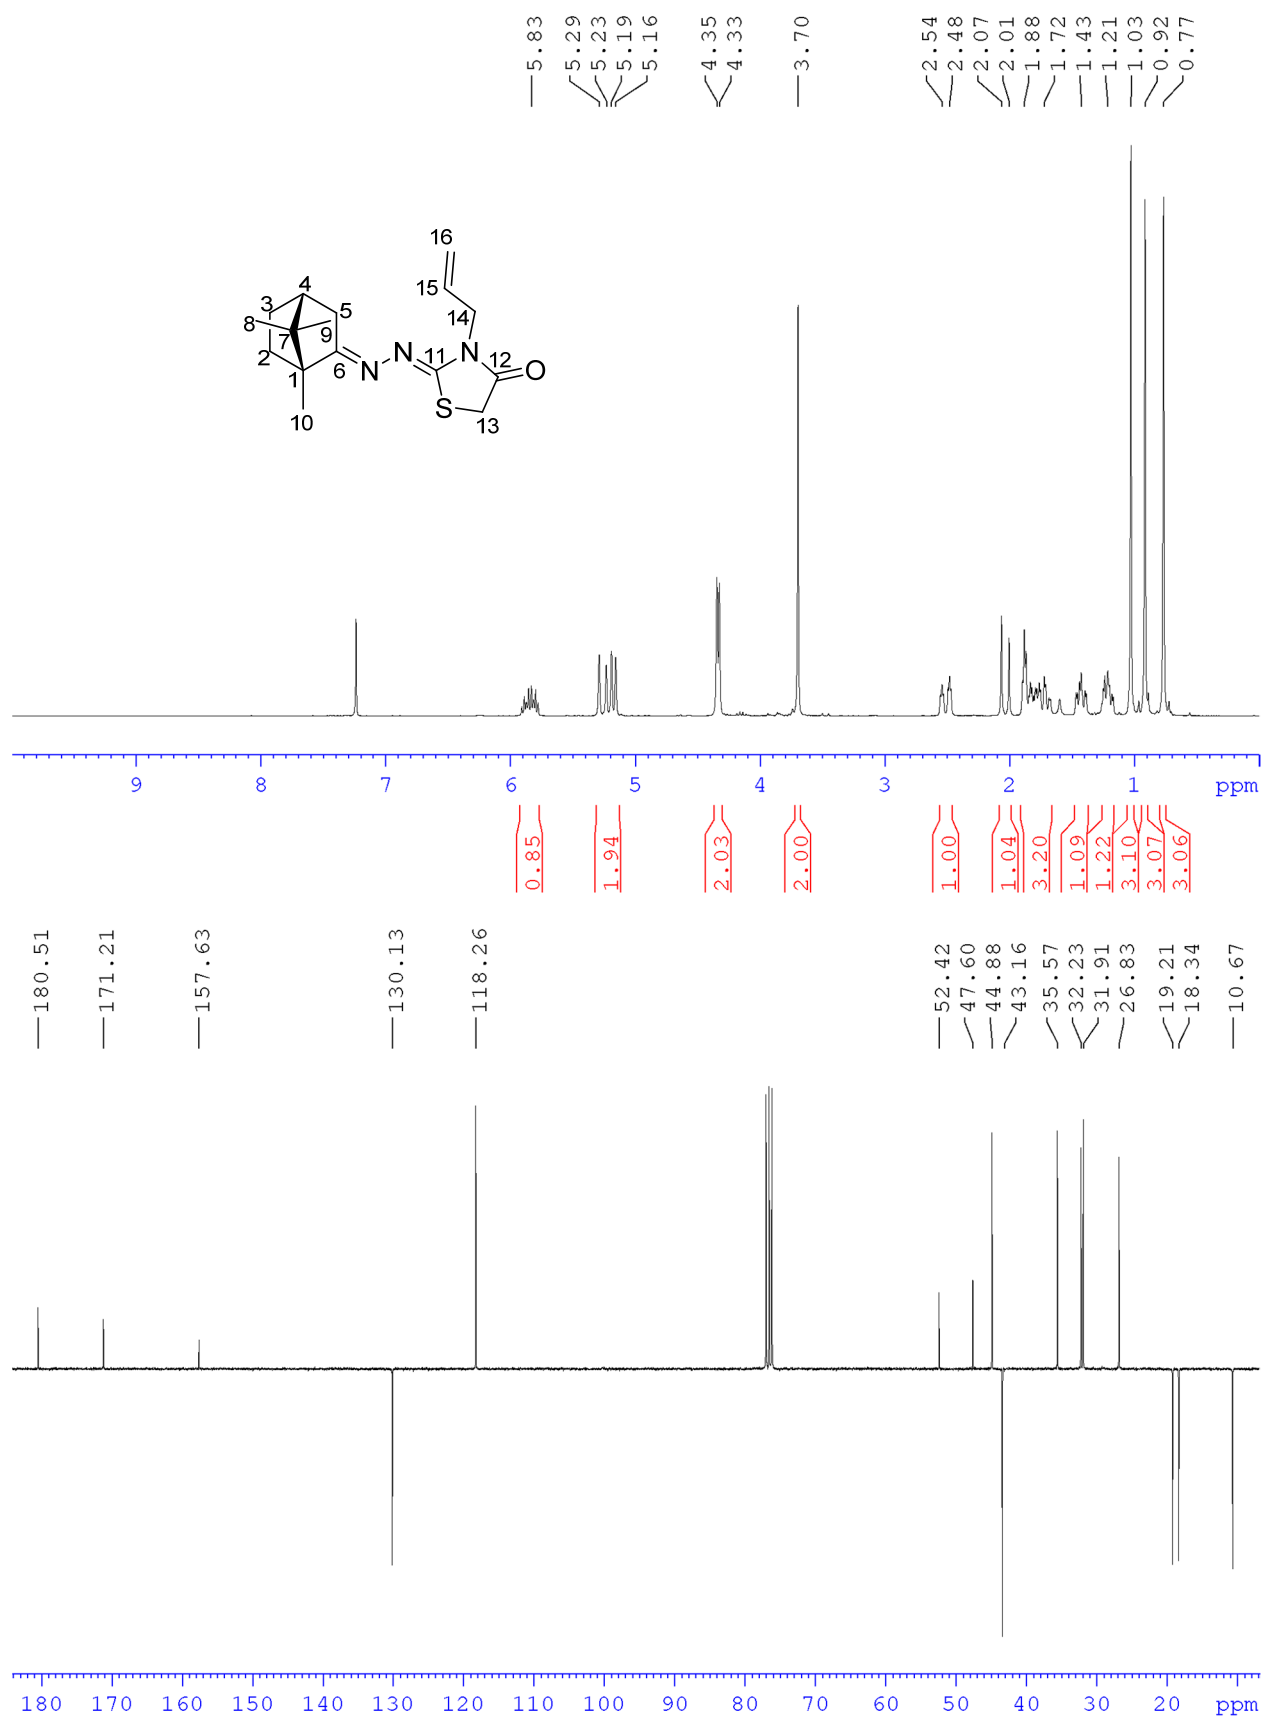

1.11.  $^1\text{H}$  NMR and  $^{13}\text{C}$  NMR spectra of compound 3c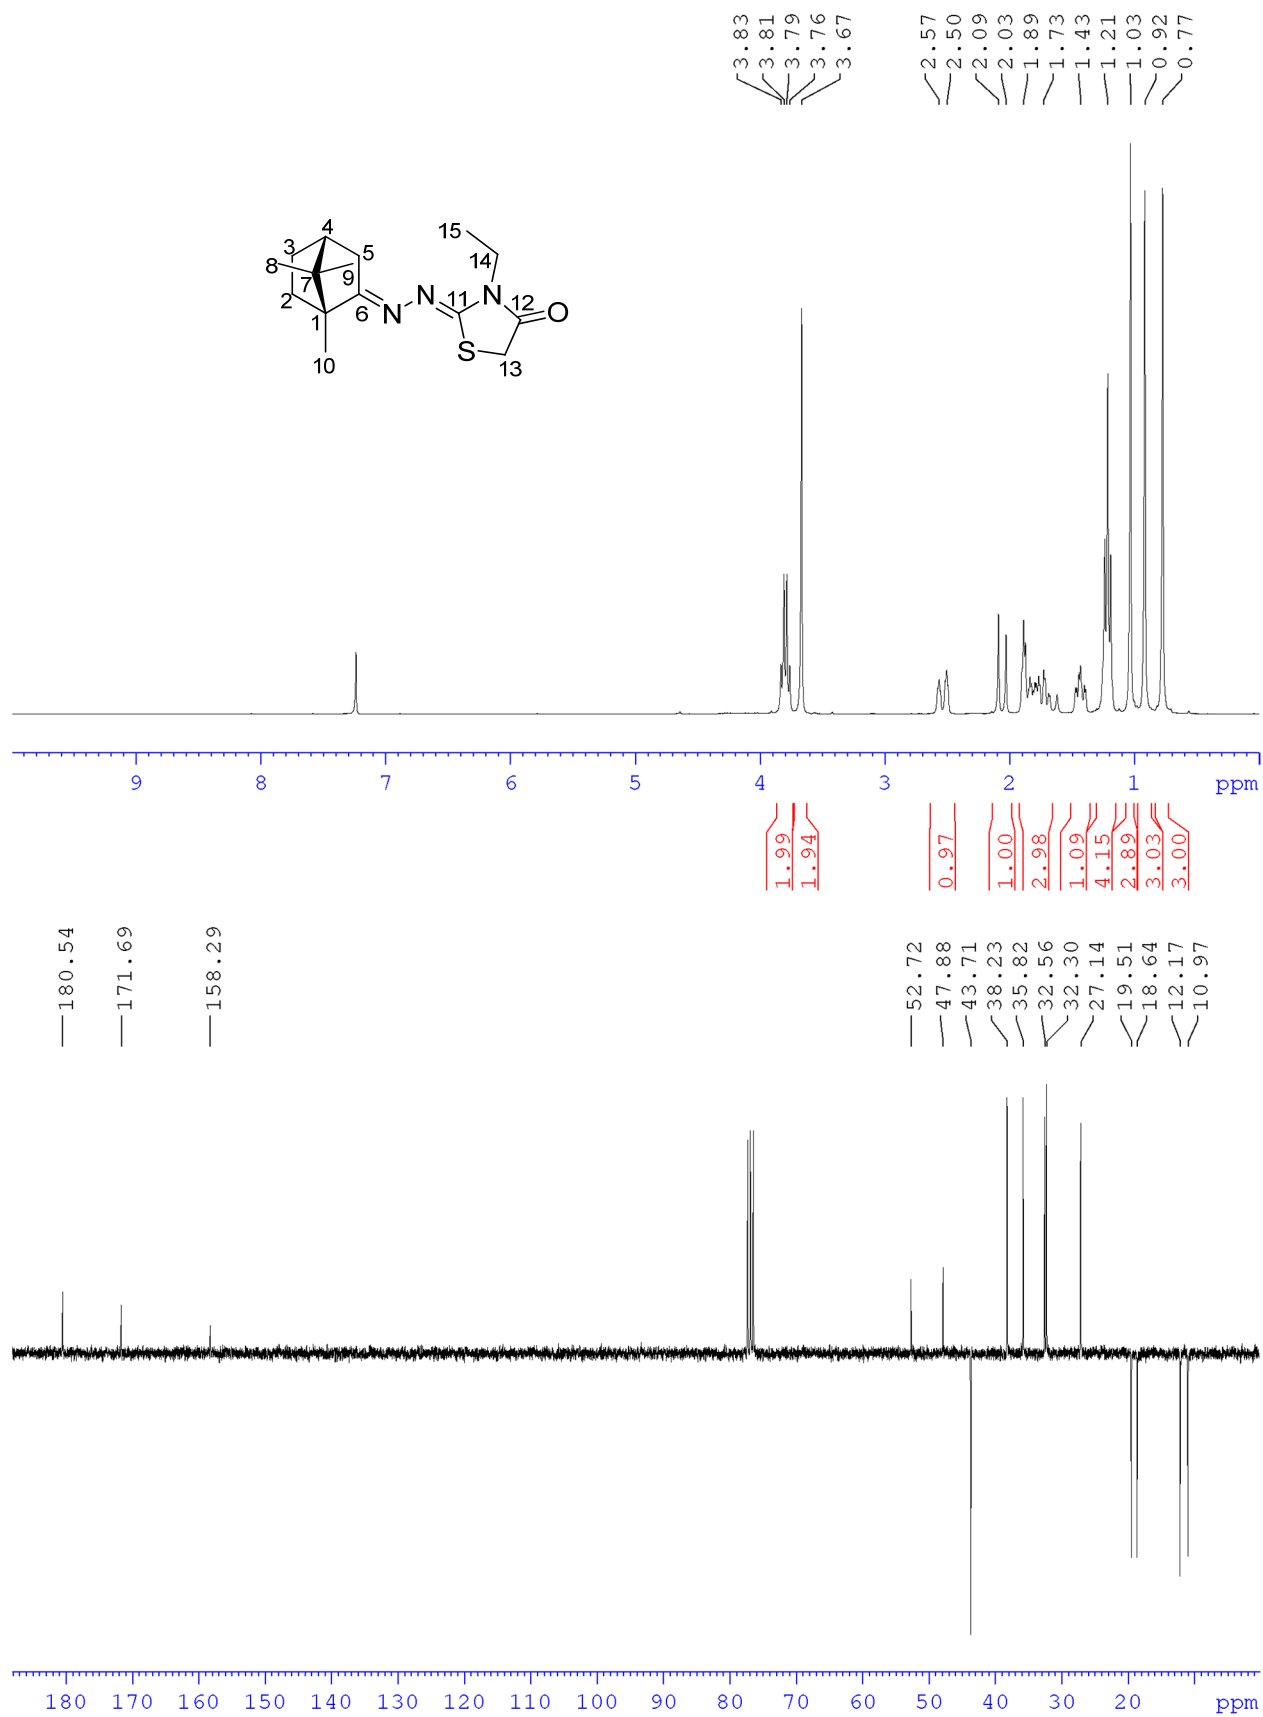

1.12.  $^1\text{H}$  NMR and  $^{13}\text{C}$  NMR spectra of compound 3d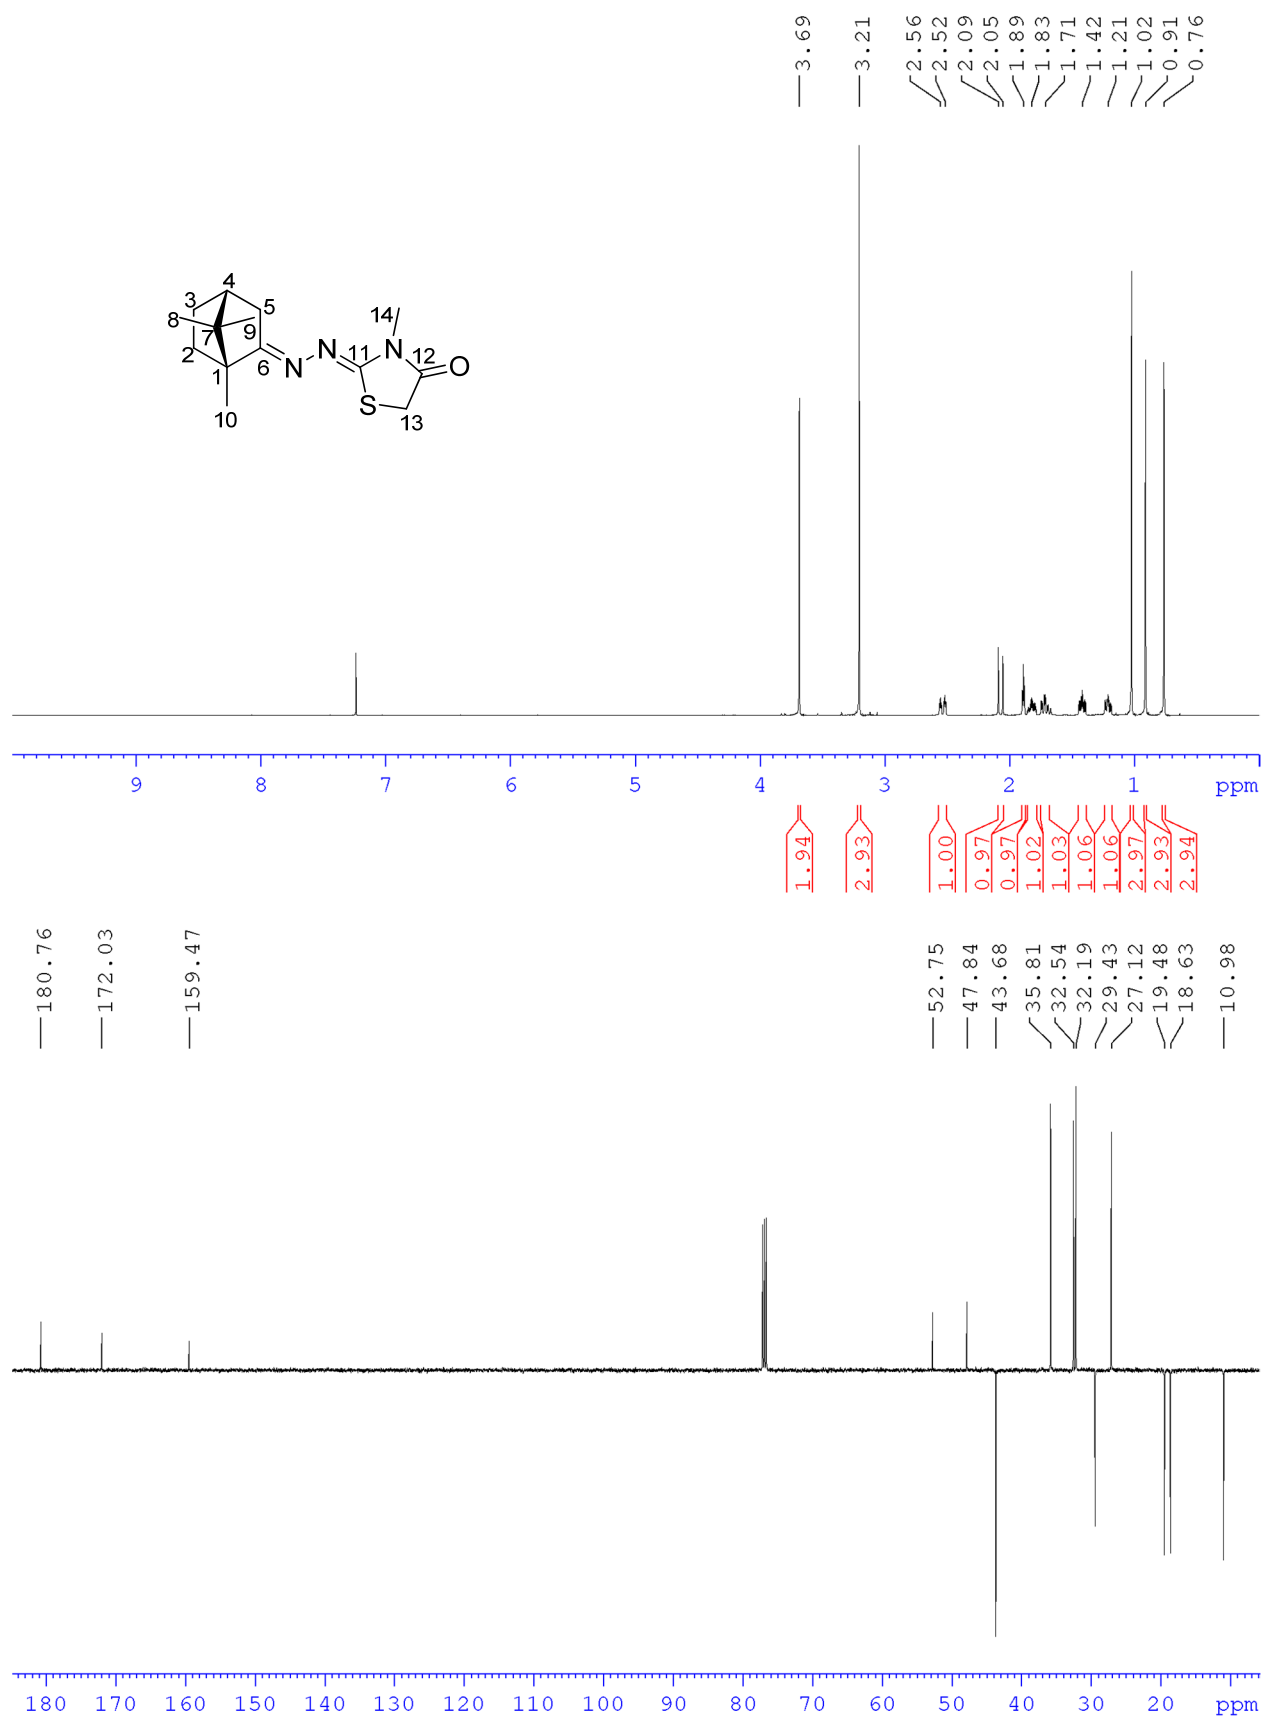

1.13.  $^1\text{H}$  NMR and  $^{13}\text{C}$  NMR spectra of compound 3'a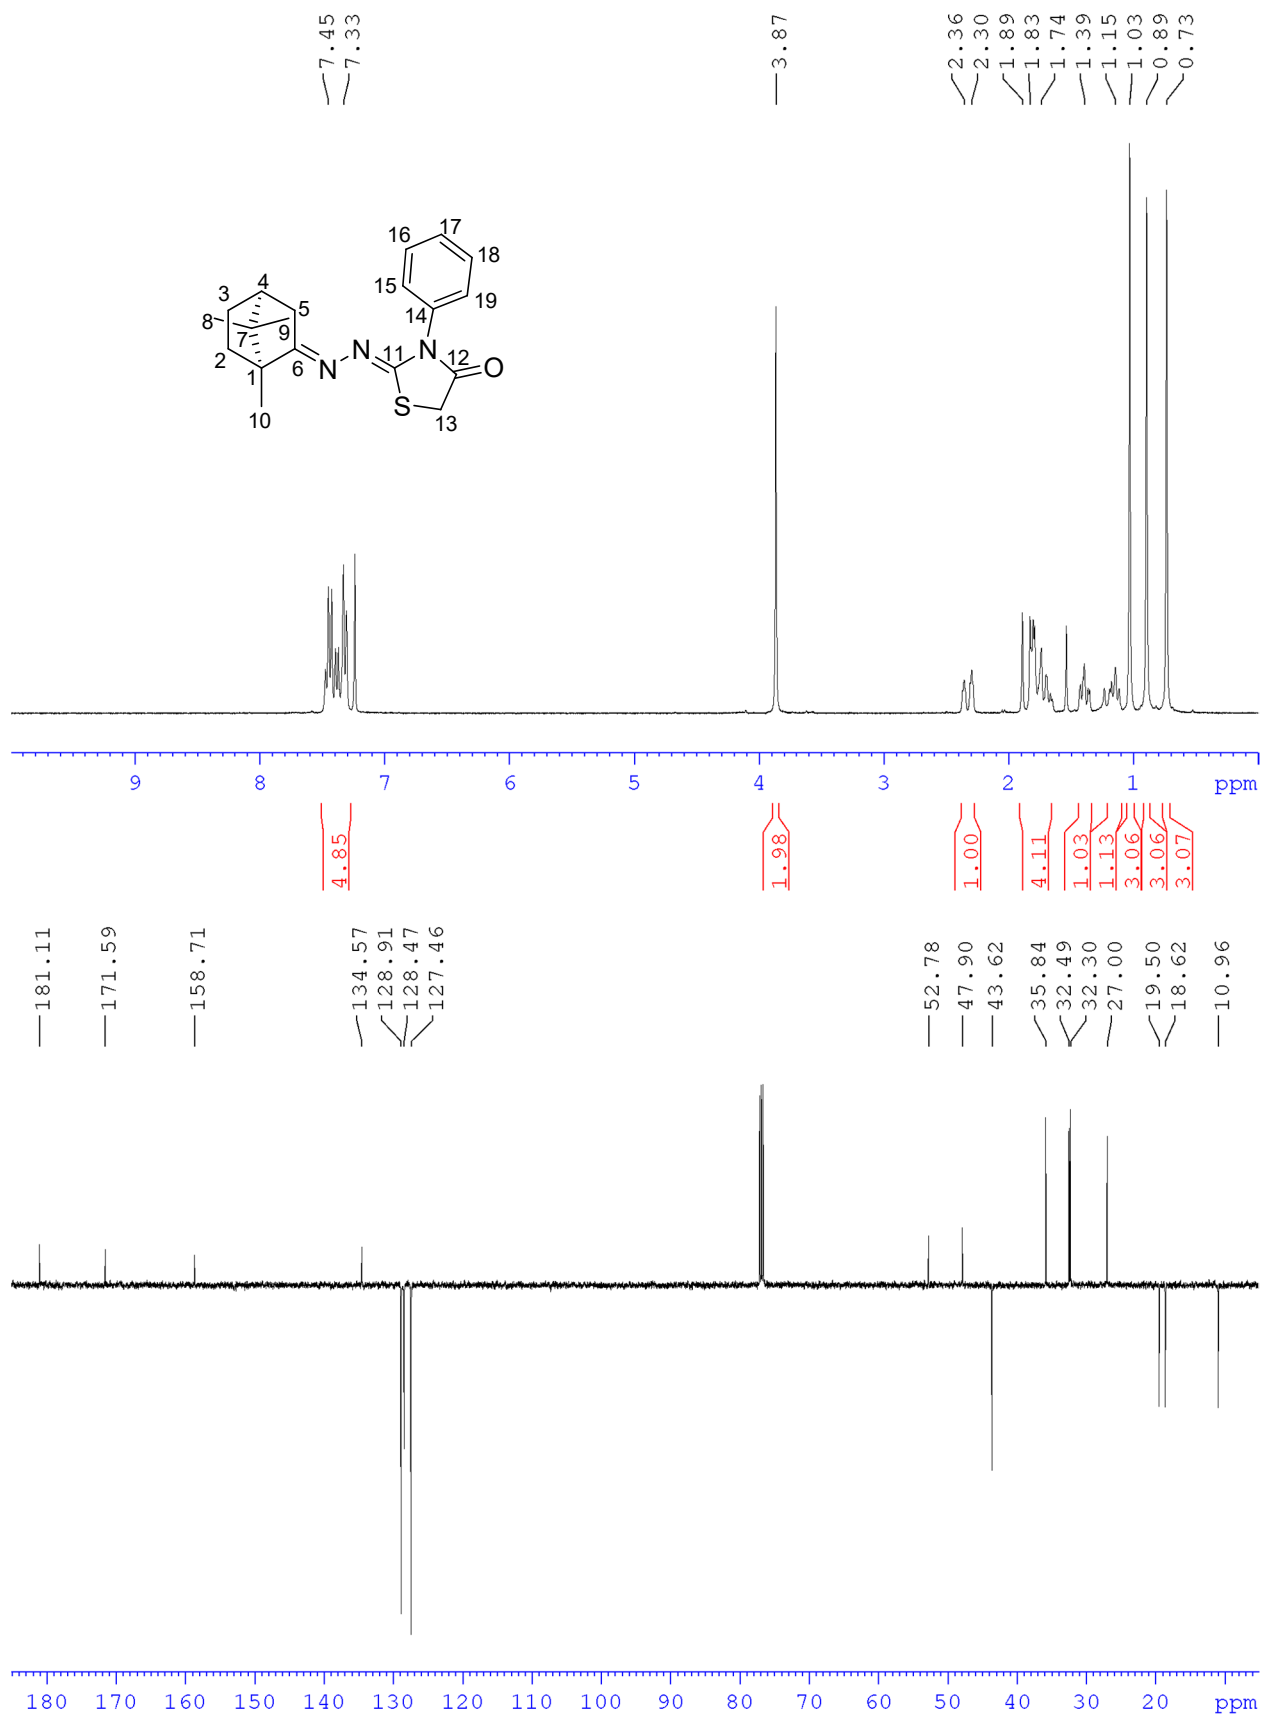

1.14.  $^1\text{H}$  NMR and  $^{13}\text{C}$  NMR spectra of compound 3'b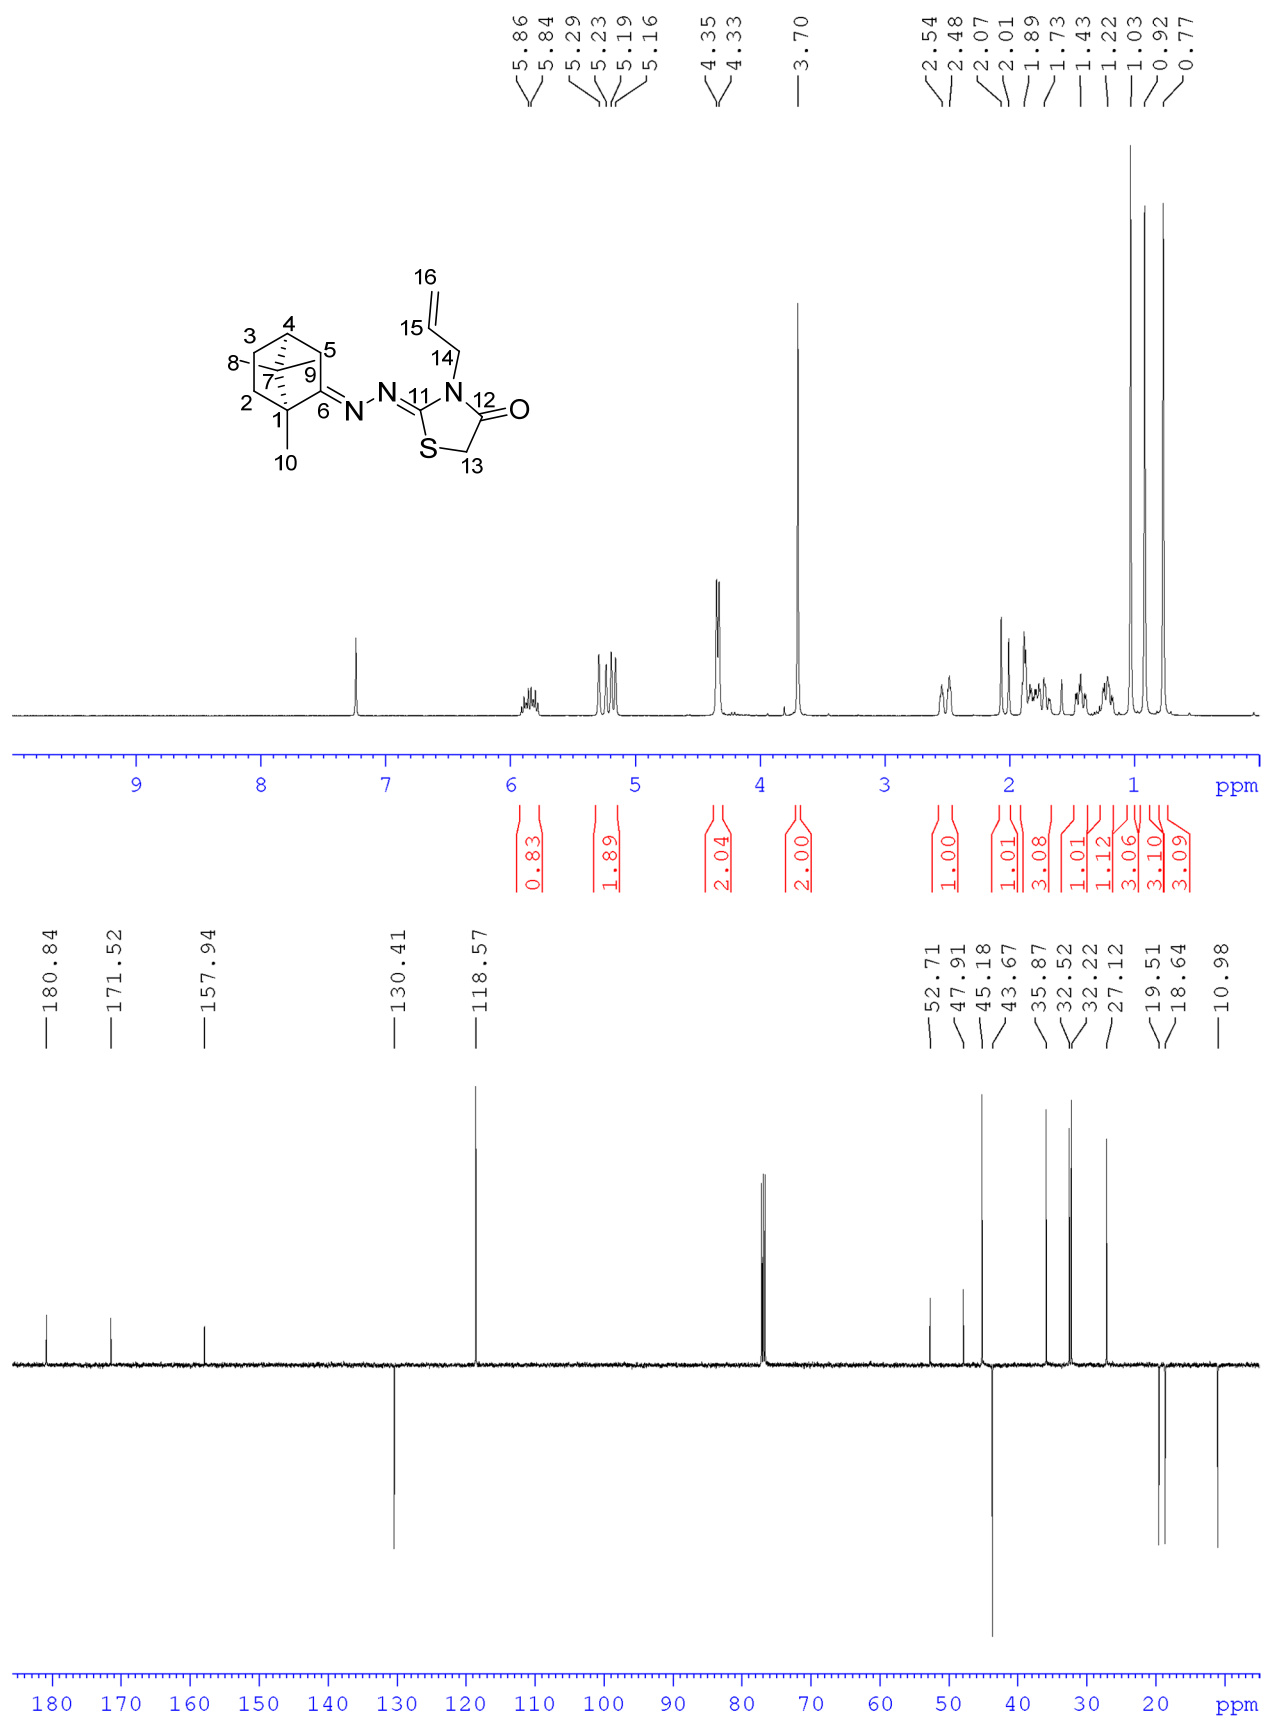

1.15.  $^1\text{H}$  NMR and  $^{13}\text{C}$  NMR spectra of compound 3'c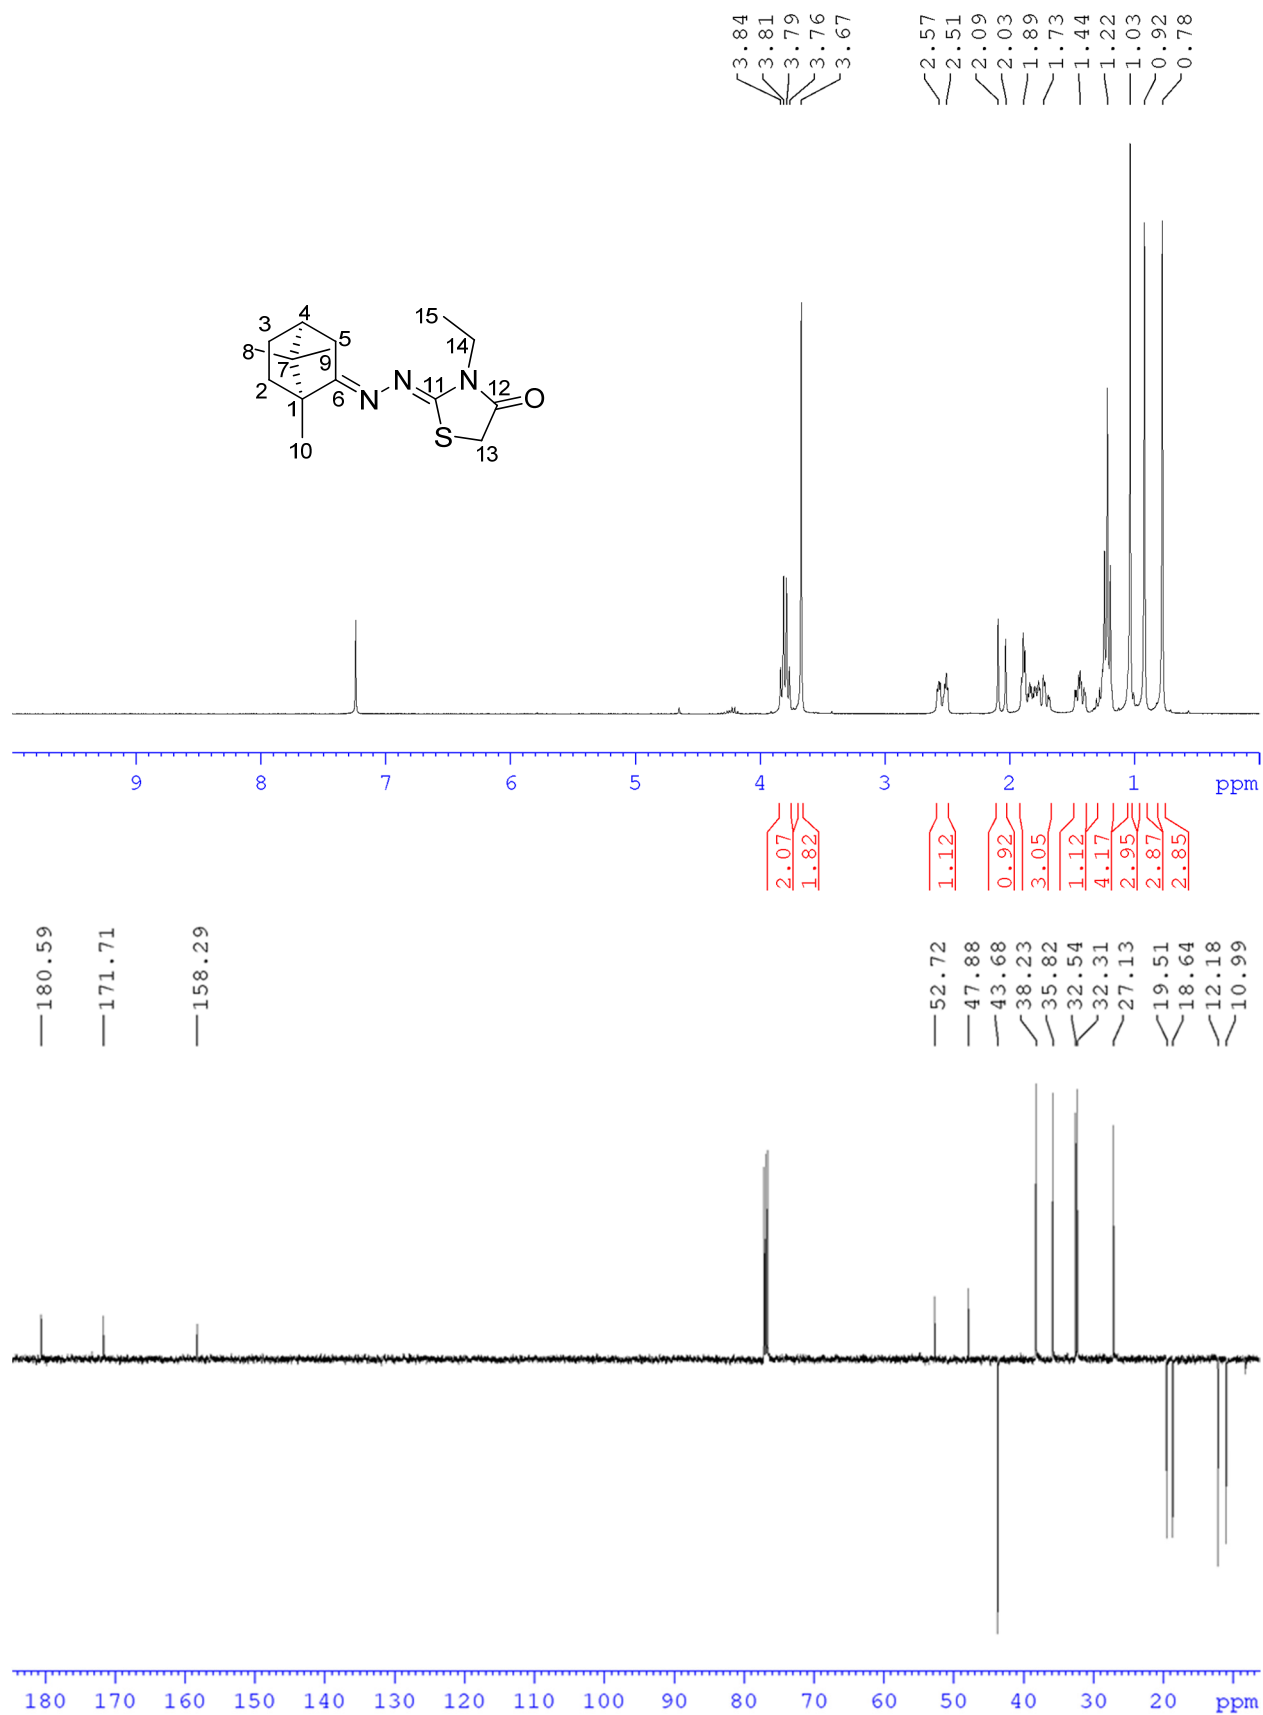



1.16.  $^1\text{H}$  NMR and  $^{13}\text{C}$  NMR spectra of compound 3'd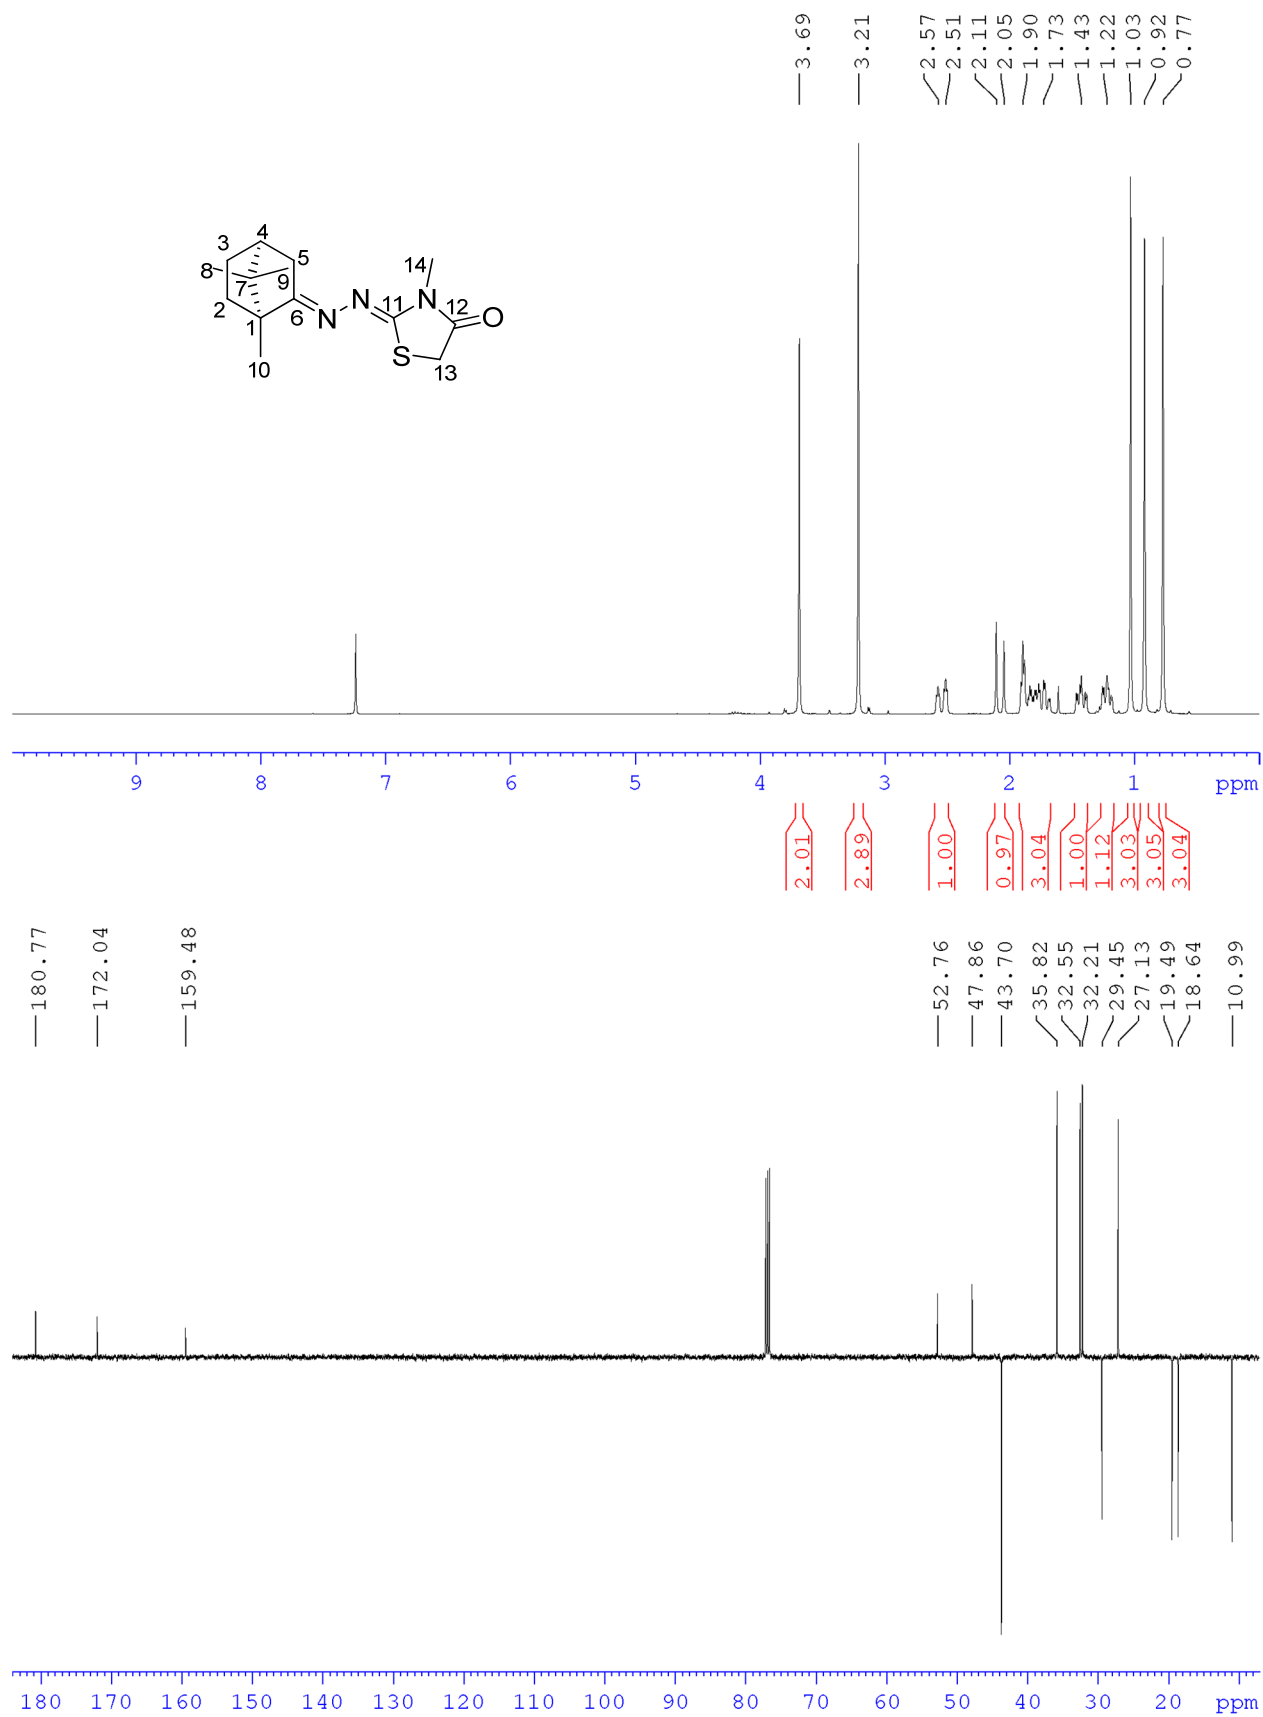

1.17.  $^1\text{H}$  NMR and  $^{13}\text{C}$  NMR spectra of compound 4a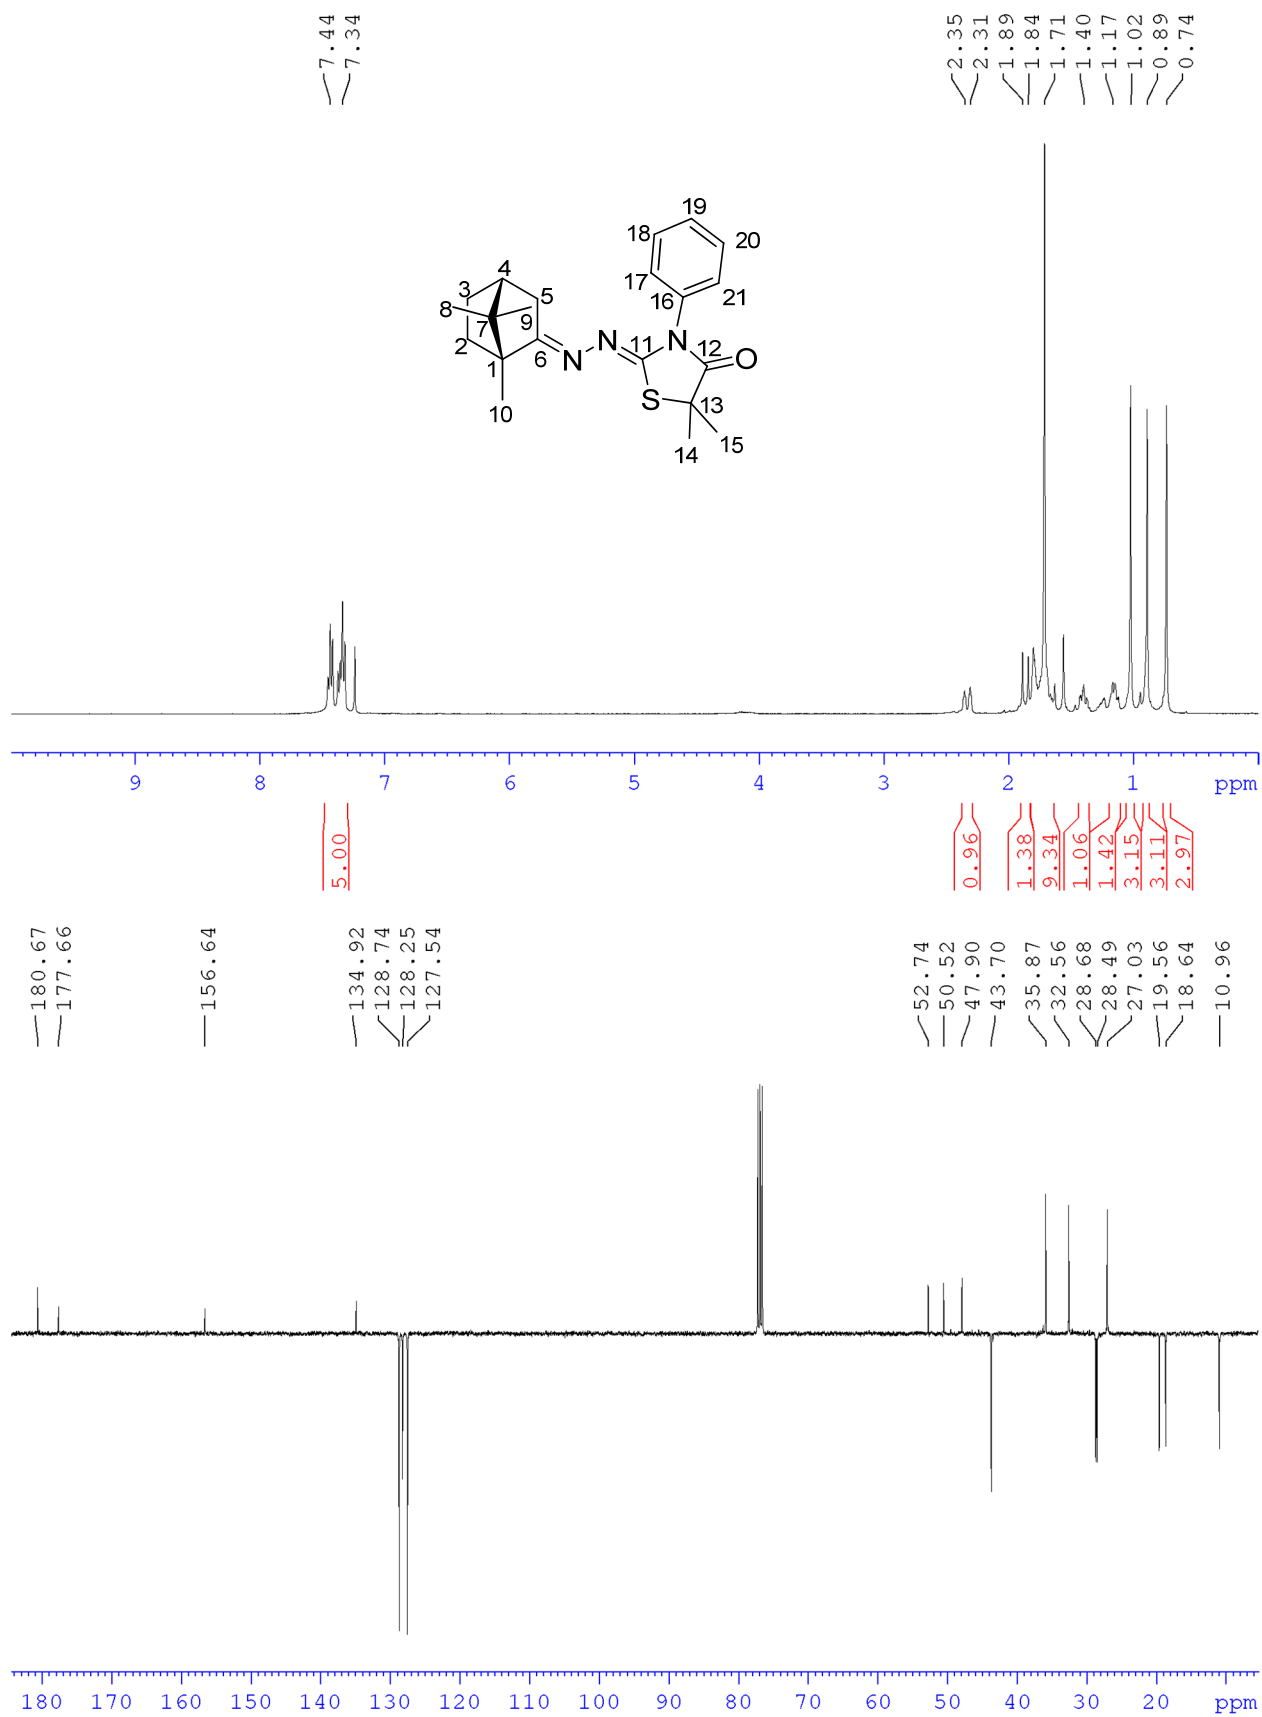

1.18.  $^1\text{H}$  NMR and  $^{13}\text{C}$  NMR spectra of compound 4b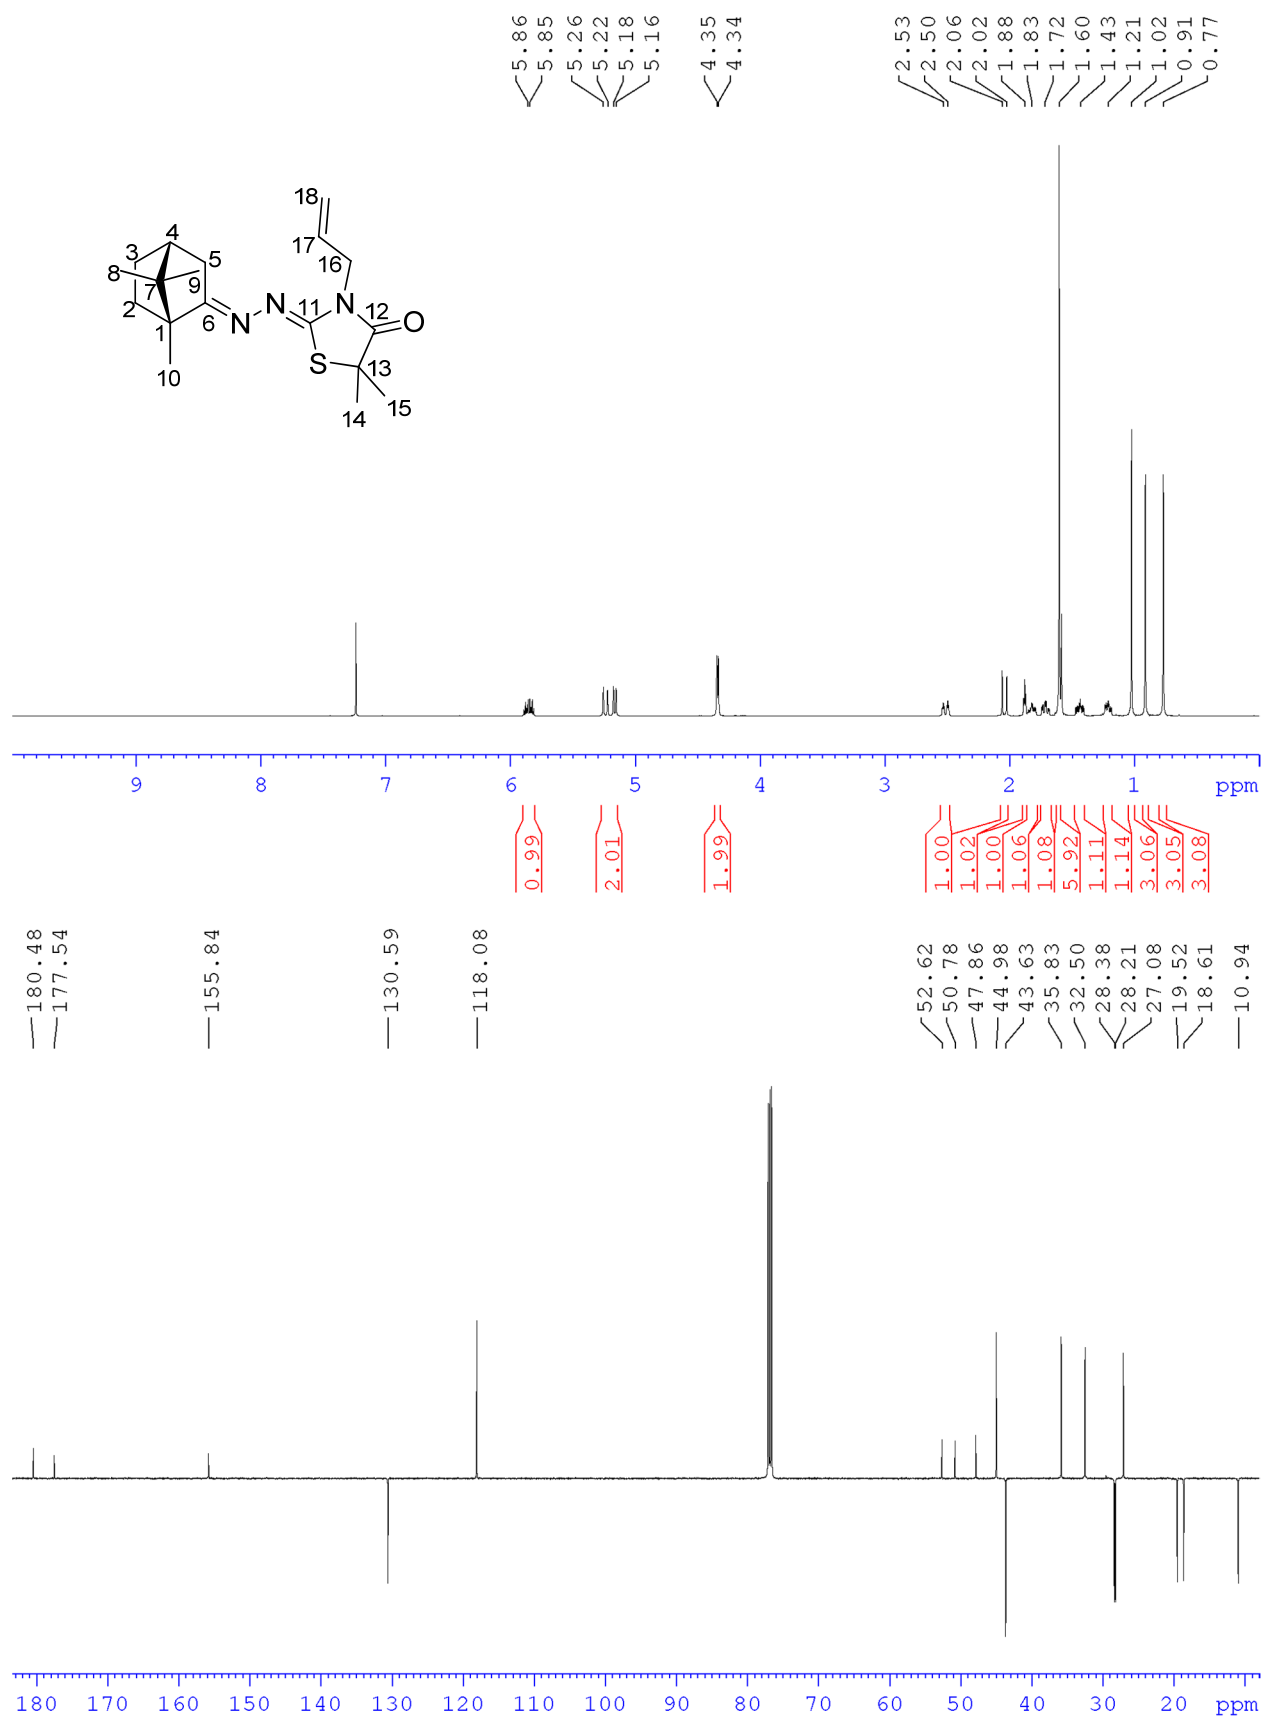

1.19.  $^1\text{H}$  NMR and  $^{13}\text{C}$  NMR spectra of compound 4c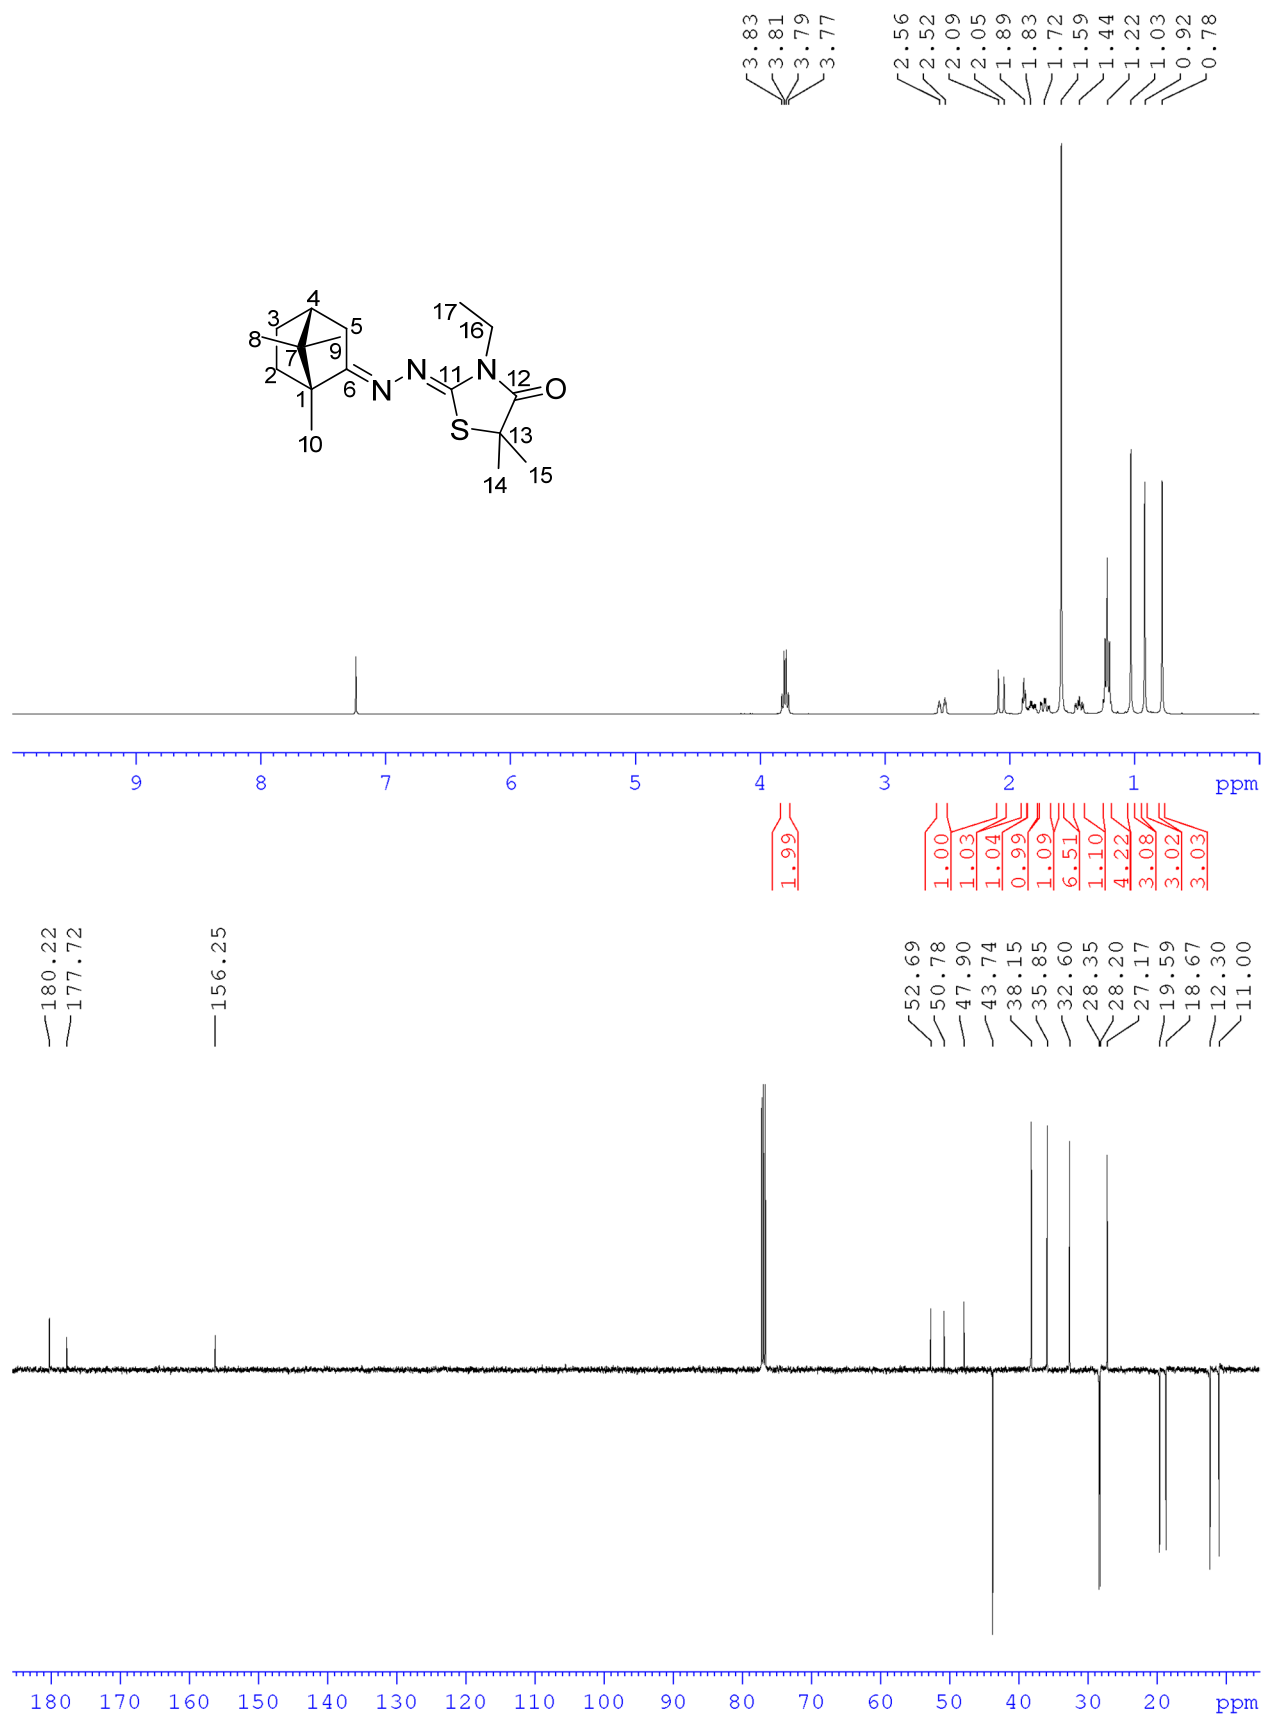

1.20.  $^1\text{H}$  NMR and  $^{13}\text{C}$  NMR spectra of compound 4d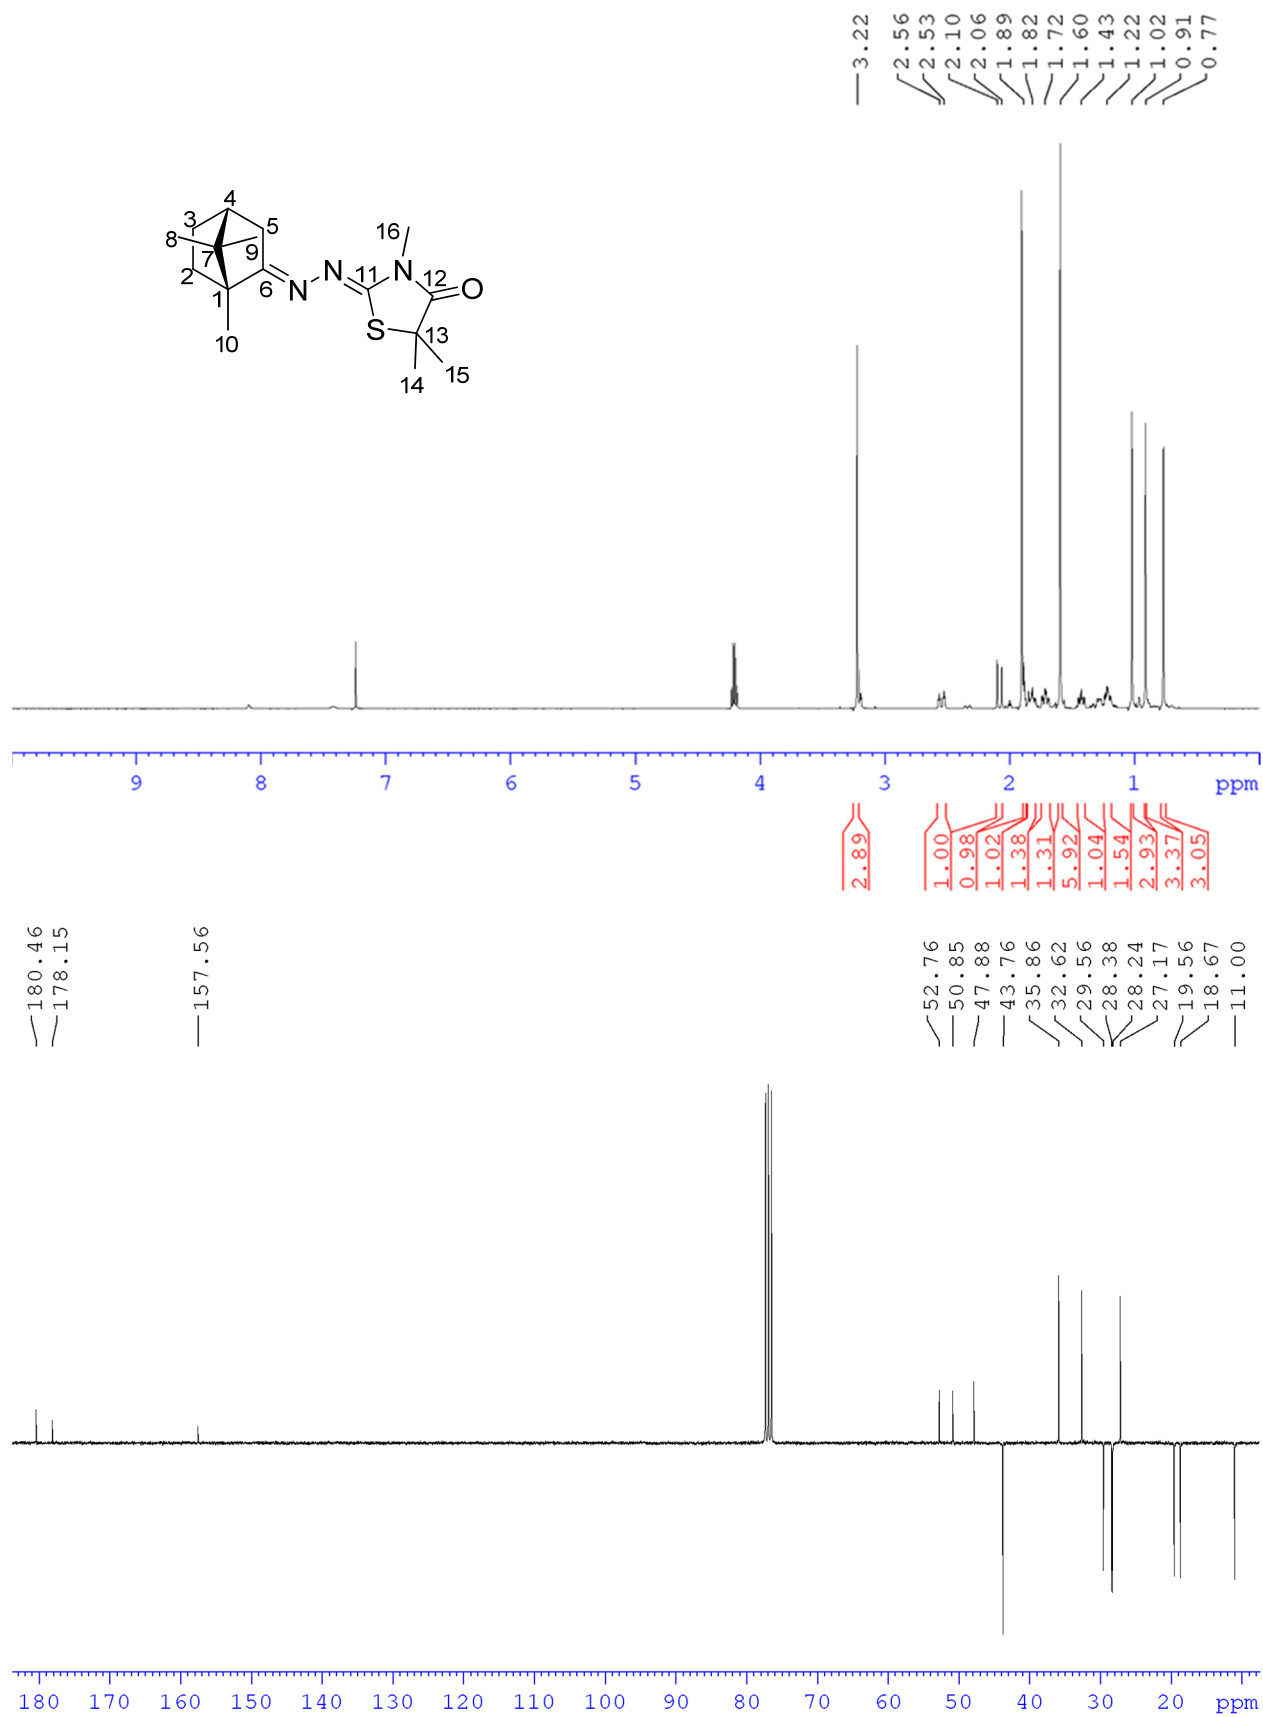

1.21.  $^1\text{H}$  NMR and  $^{13}\text{C}$  NMR spectra of compound 5a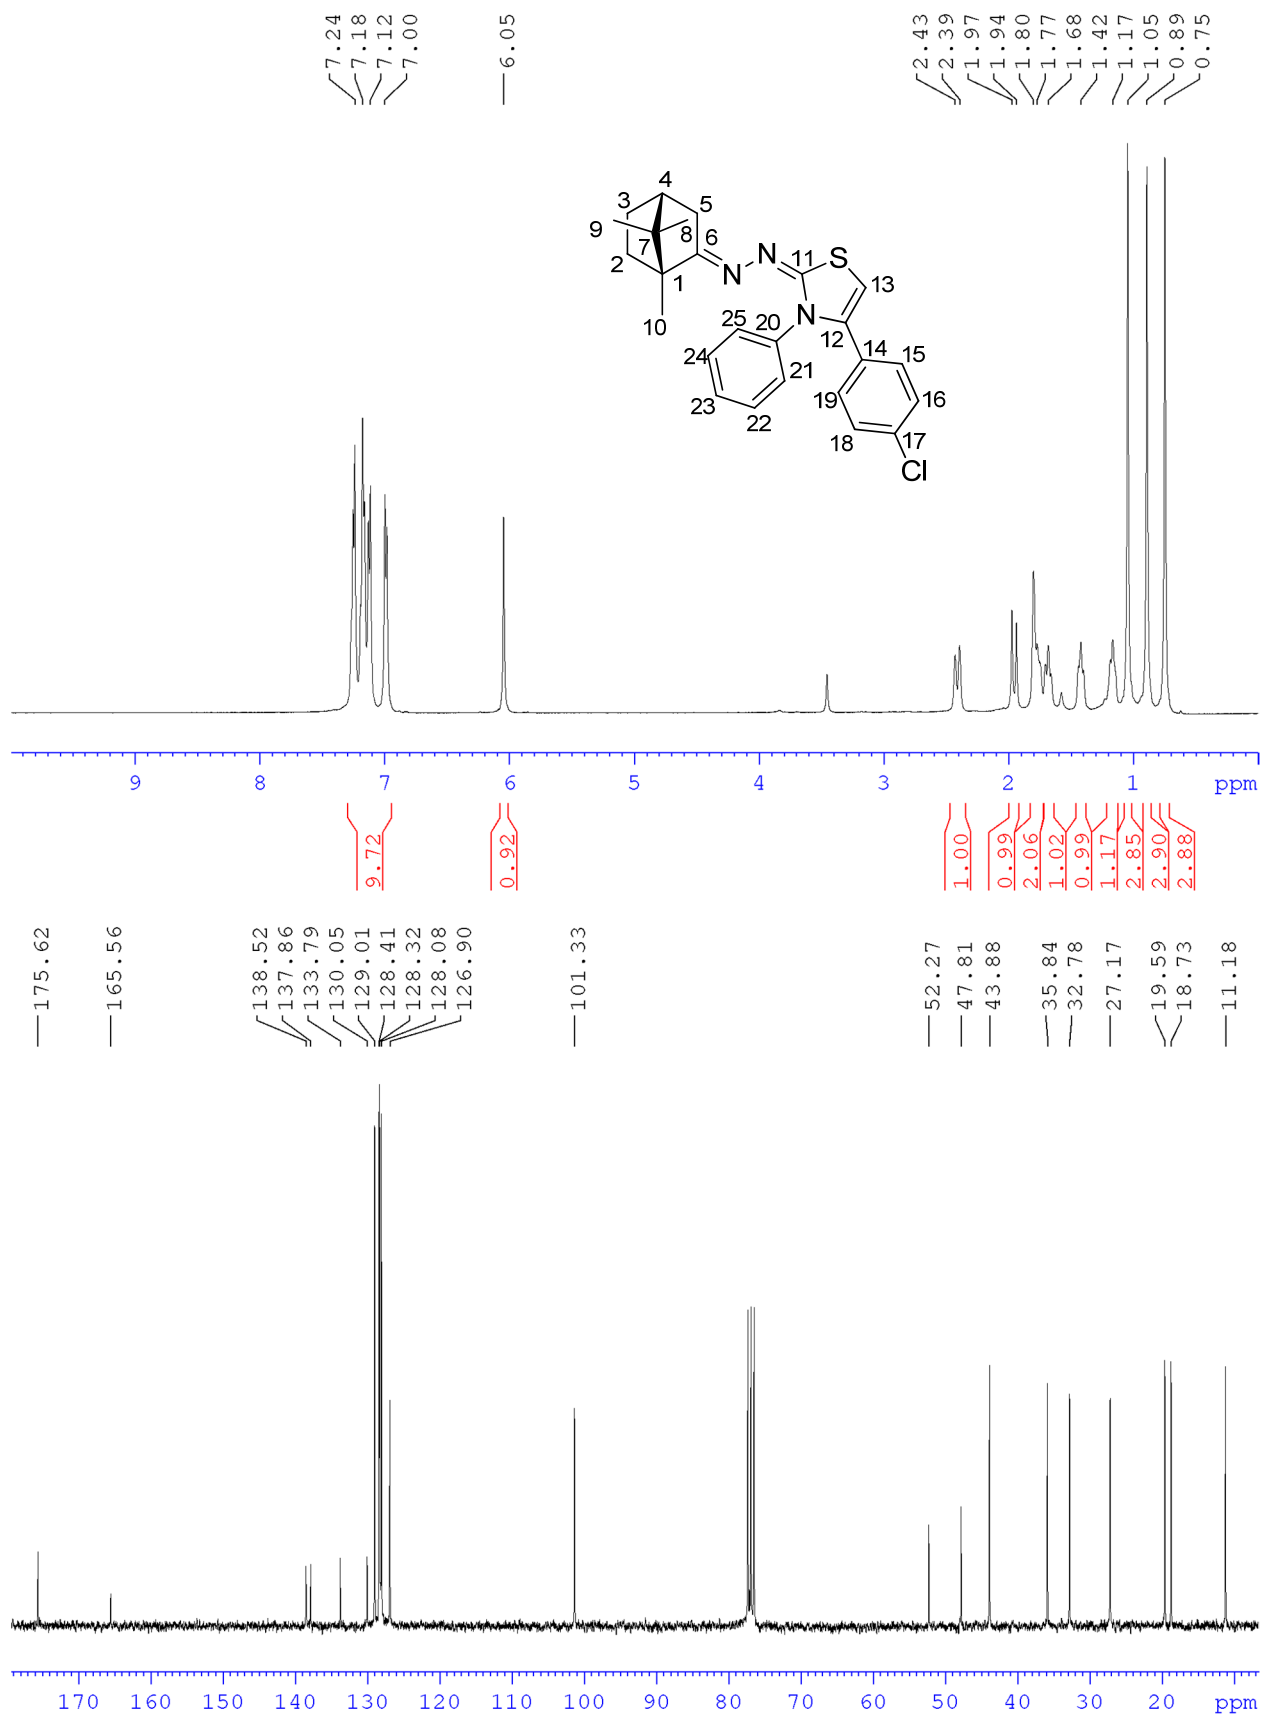

1.22.  $^1\text{H}$  NMR and  $^{13}\text{C}$  NMR spectra of compound 5b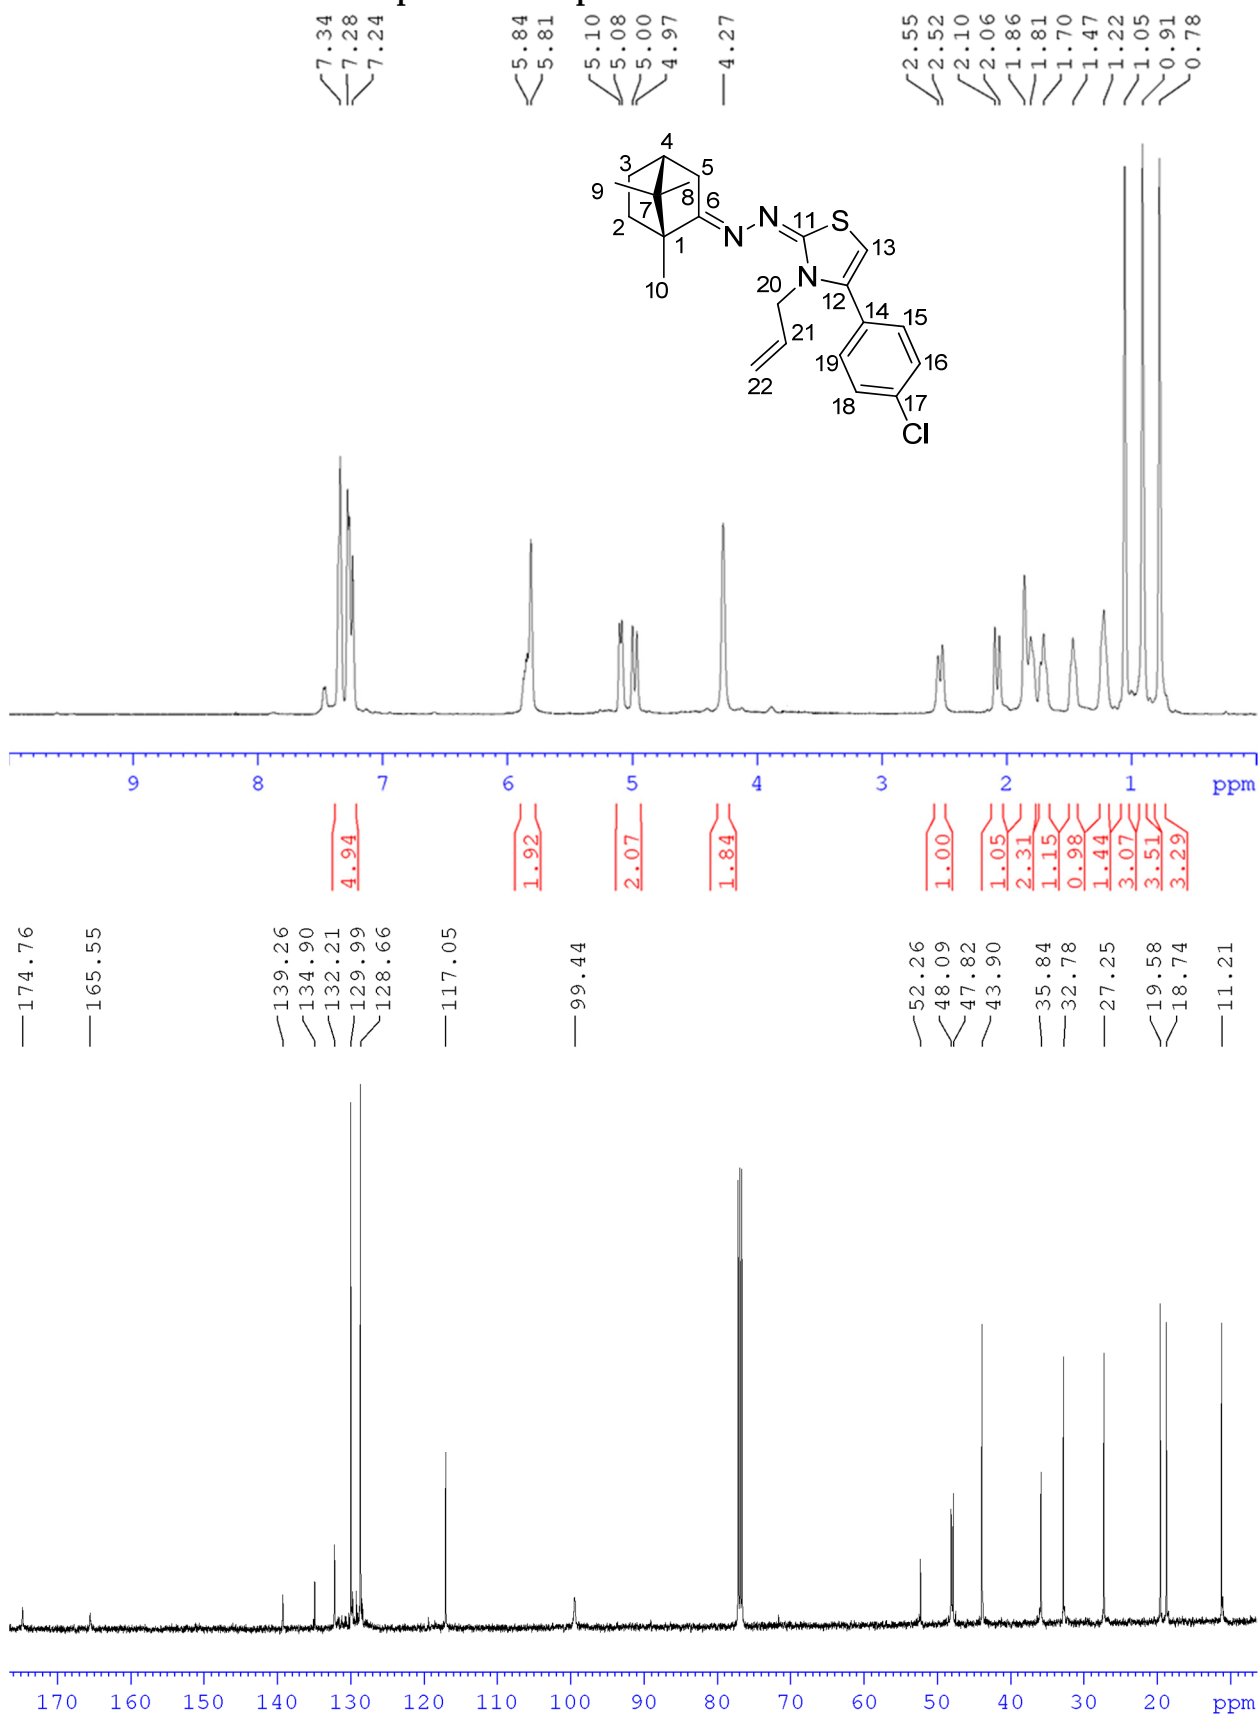

1.23.  $^1\text{H}$  NMR and  $^{13}\text{C}$  NMR spectra of compound 5c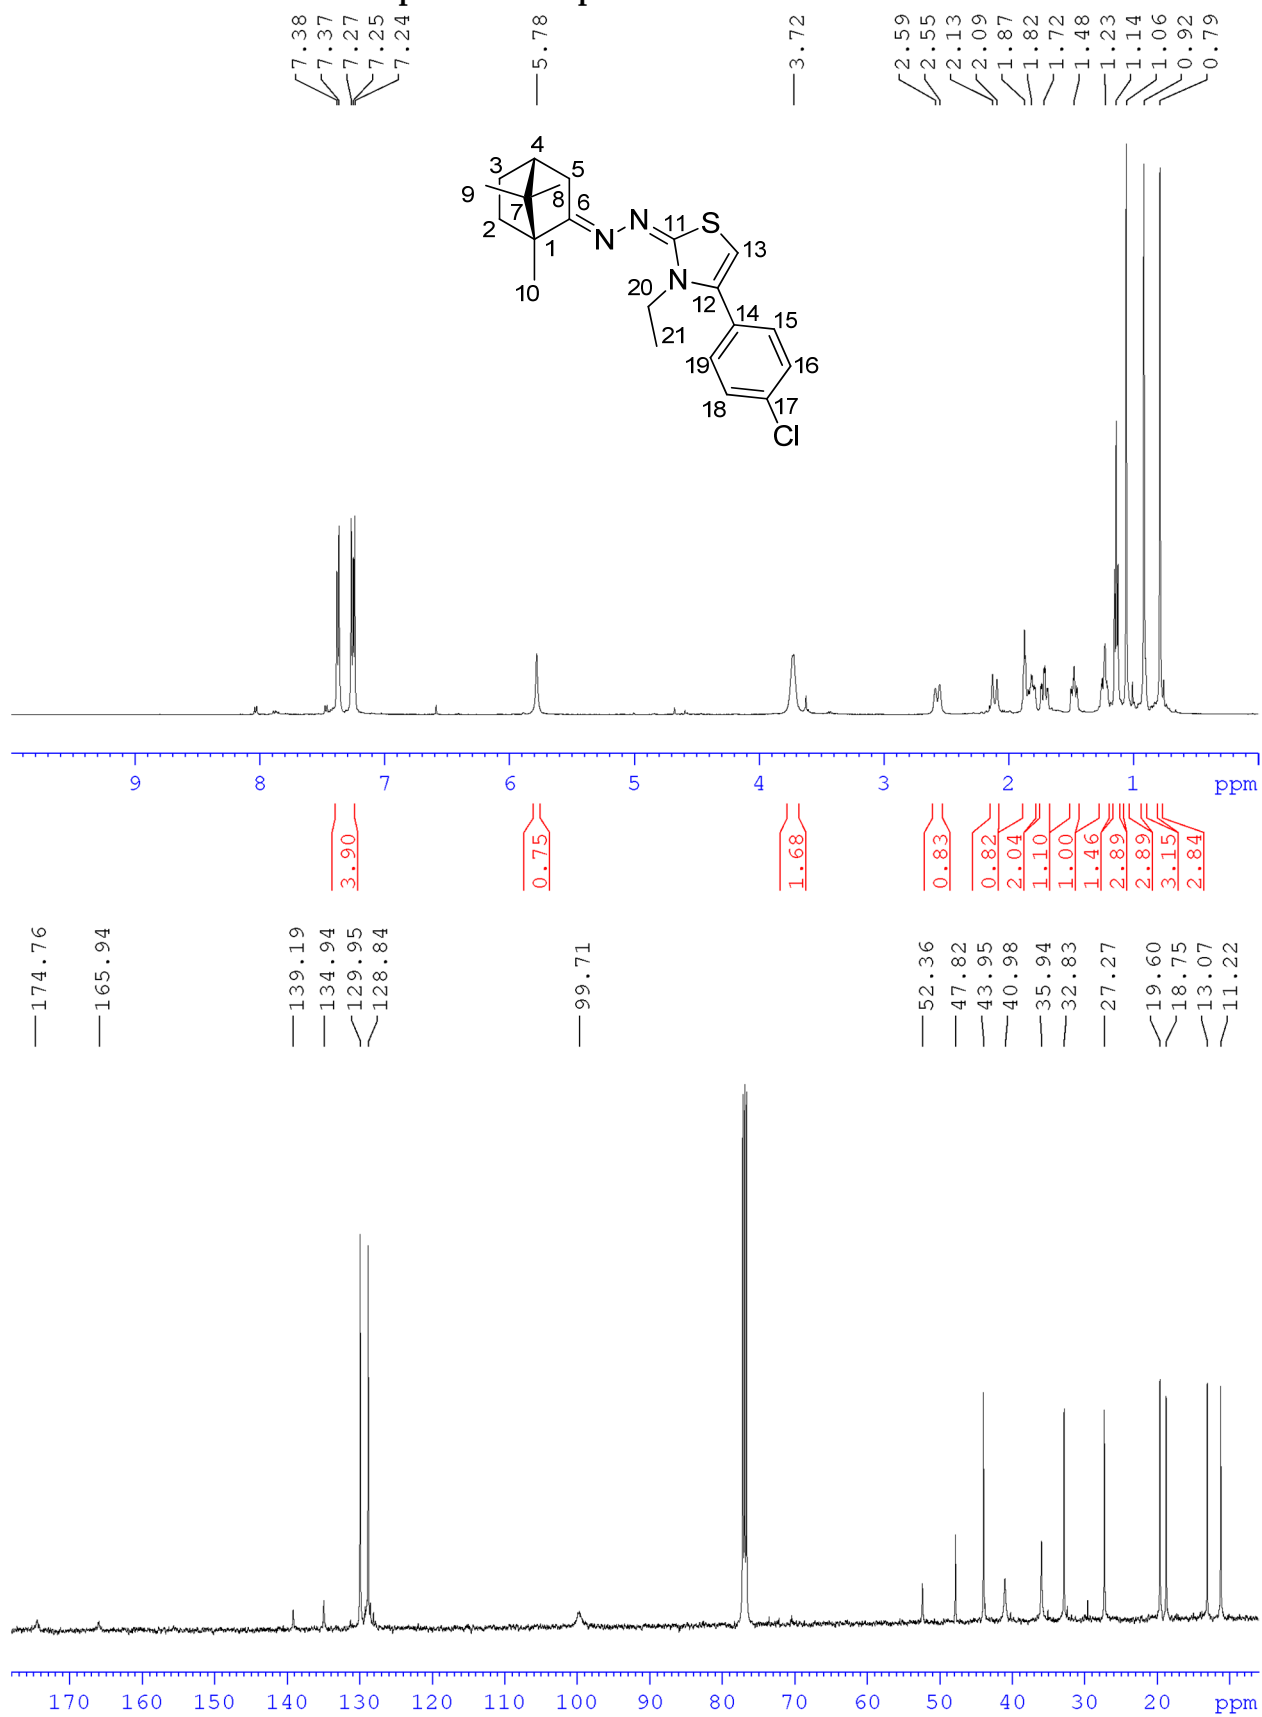



1.24.  $^1\text{H}$  NMR and  $^{13}\text{C}$  NMR spectra of compound 5d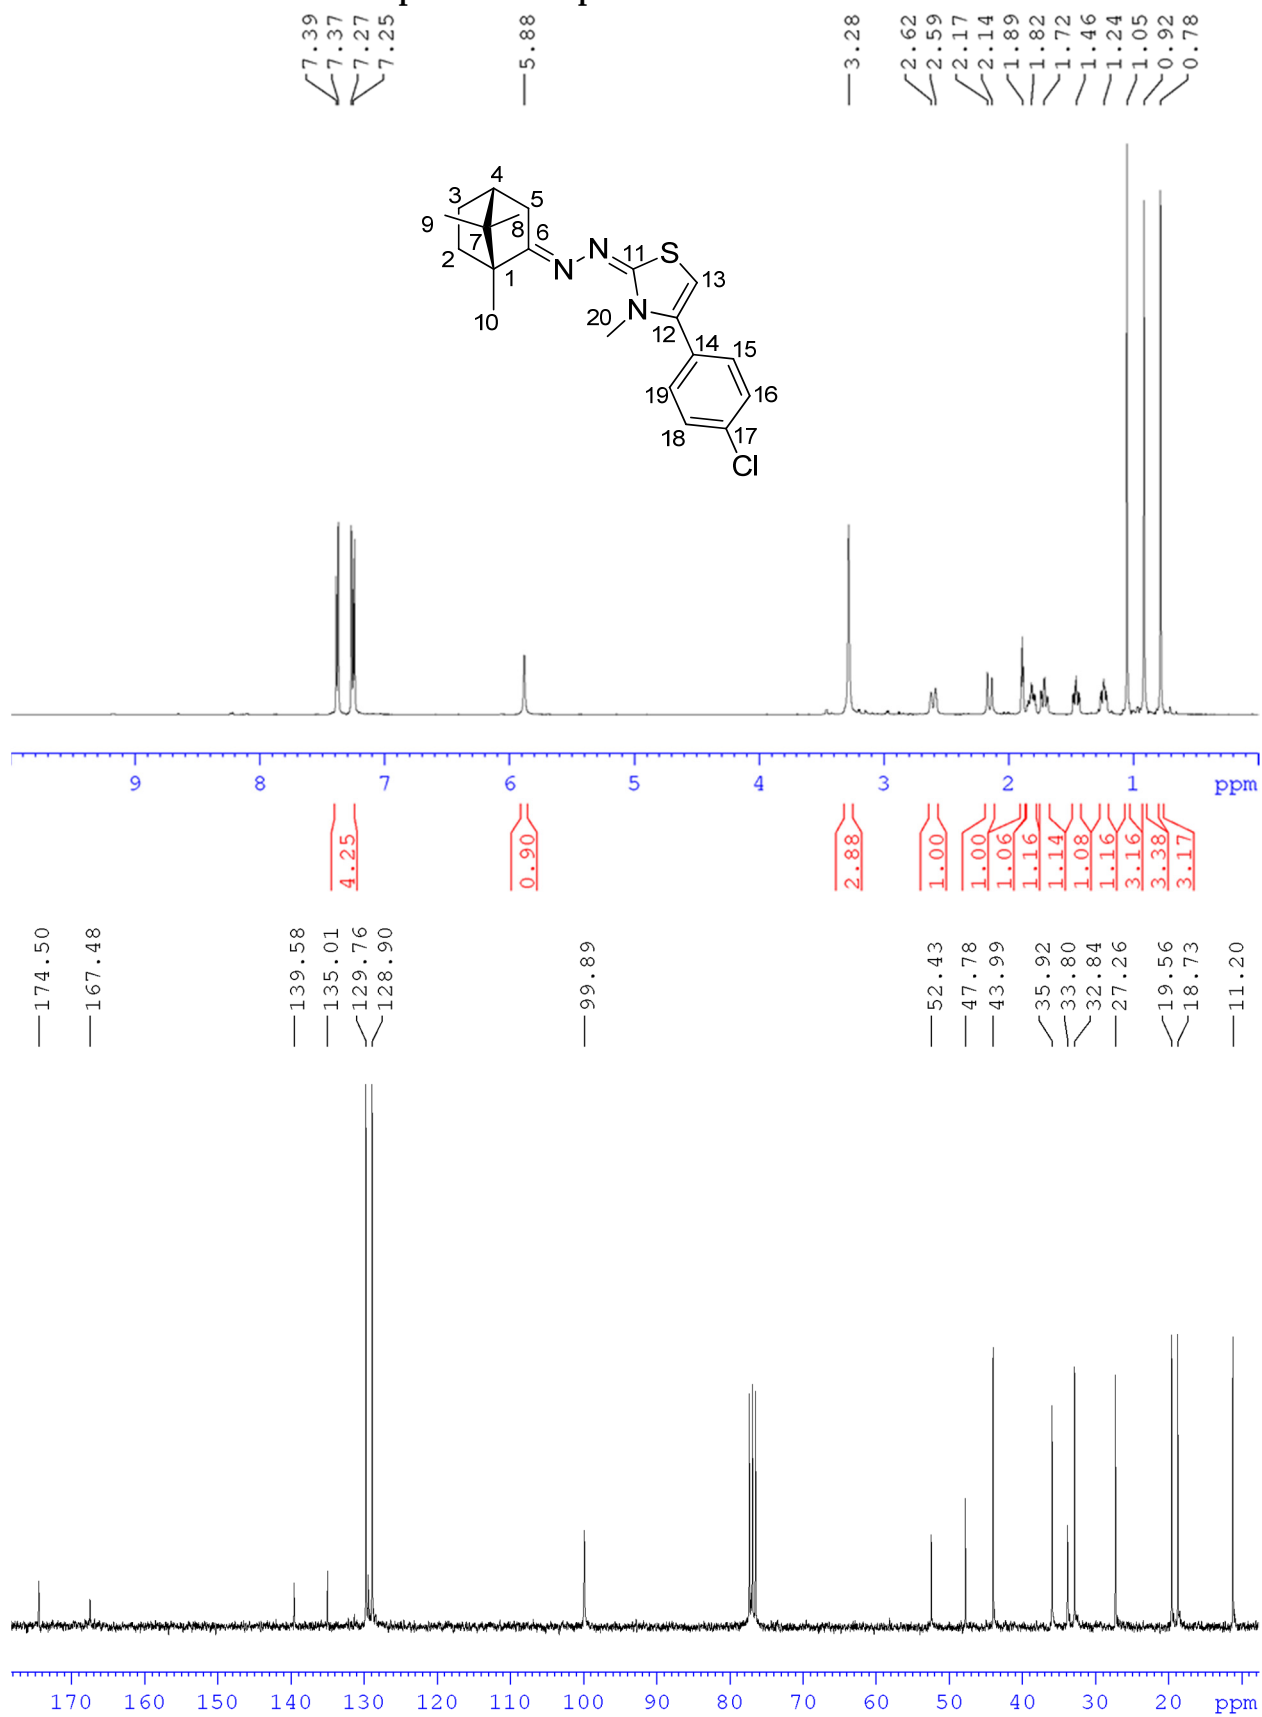

1.25.  $^1\text{H}$  NMR and  $^{13}\text{C}$  NMR spectra of compound 6a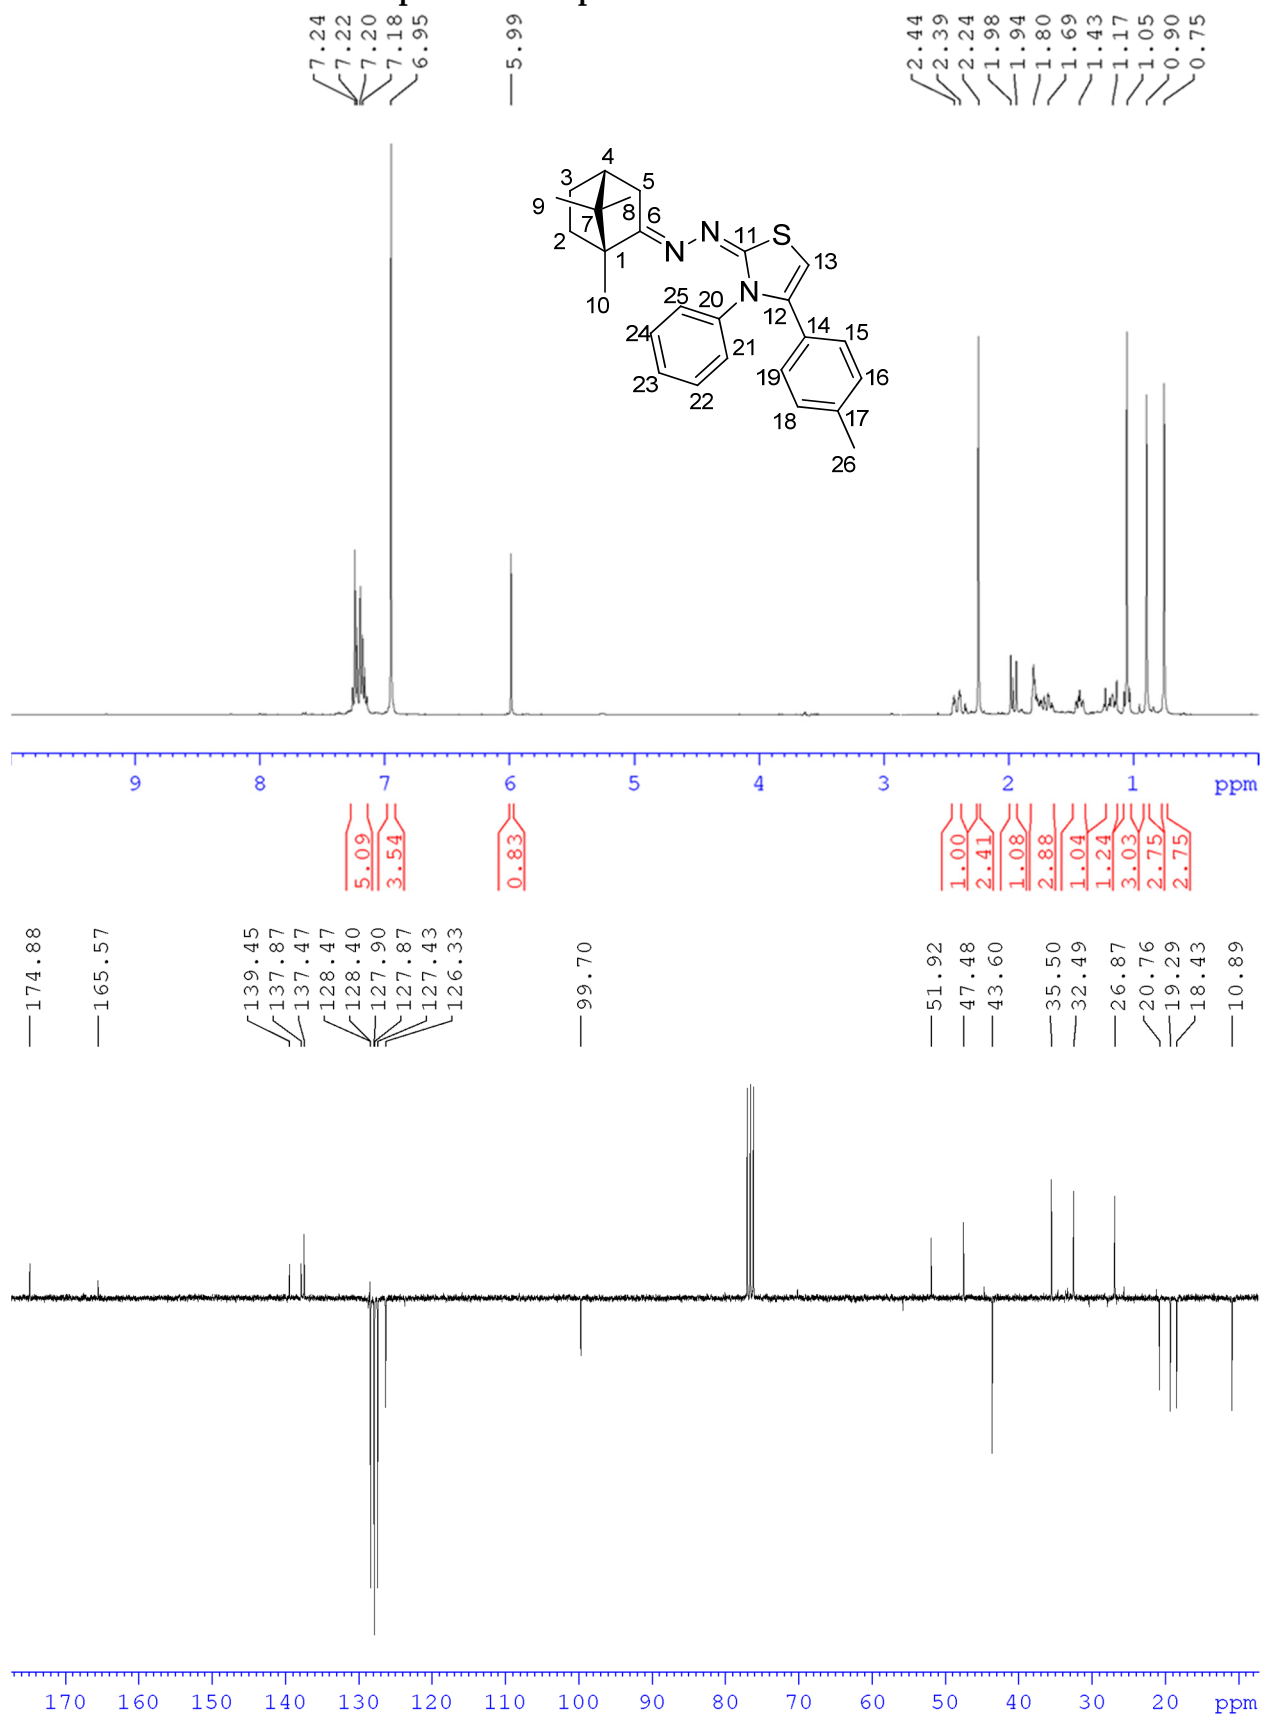

1.26.  $^1\text{H}$  NMR and  $^{13}\text{C}$  NMR spectra of compound 6b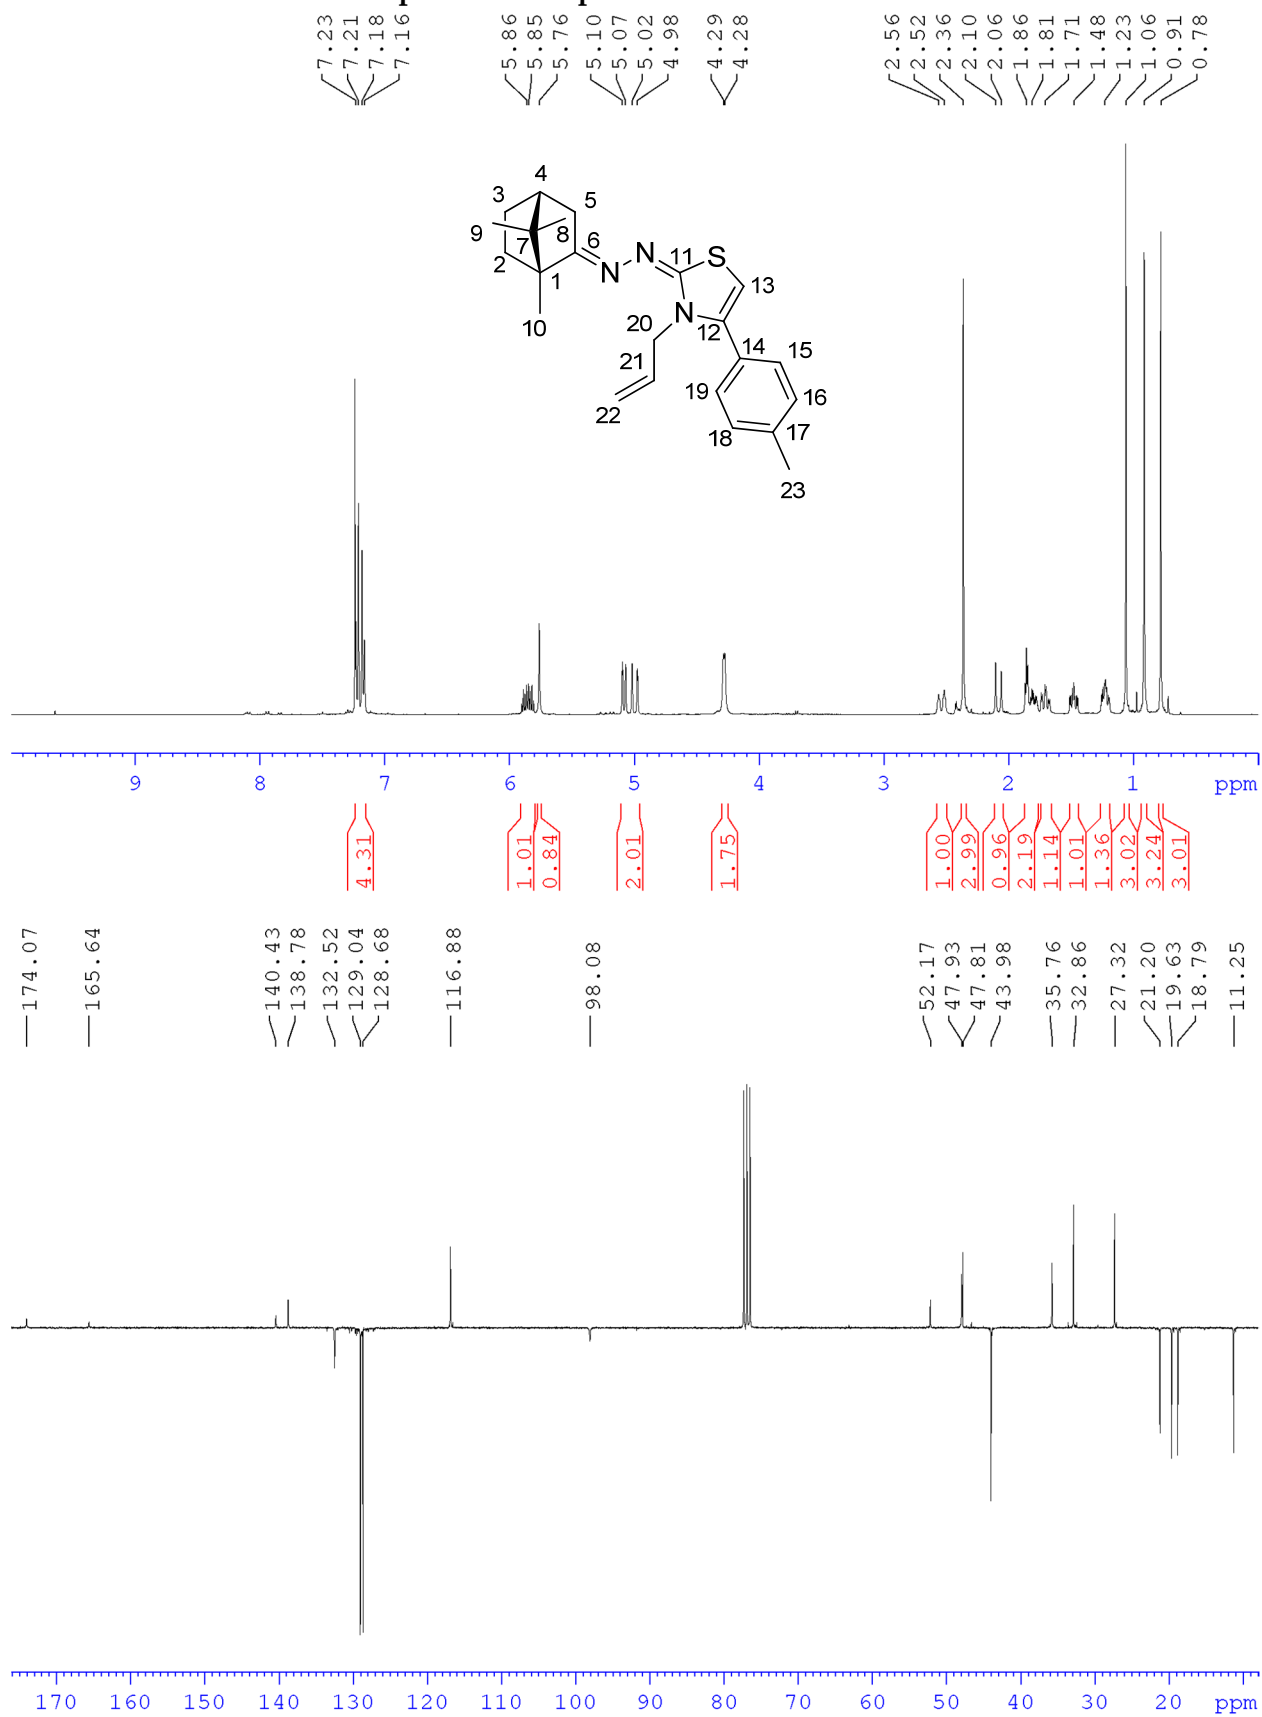

1.27.  $^1\text{H}$  NMR and  $^{13}\text{C}$  NMR spectra of compound 6c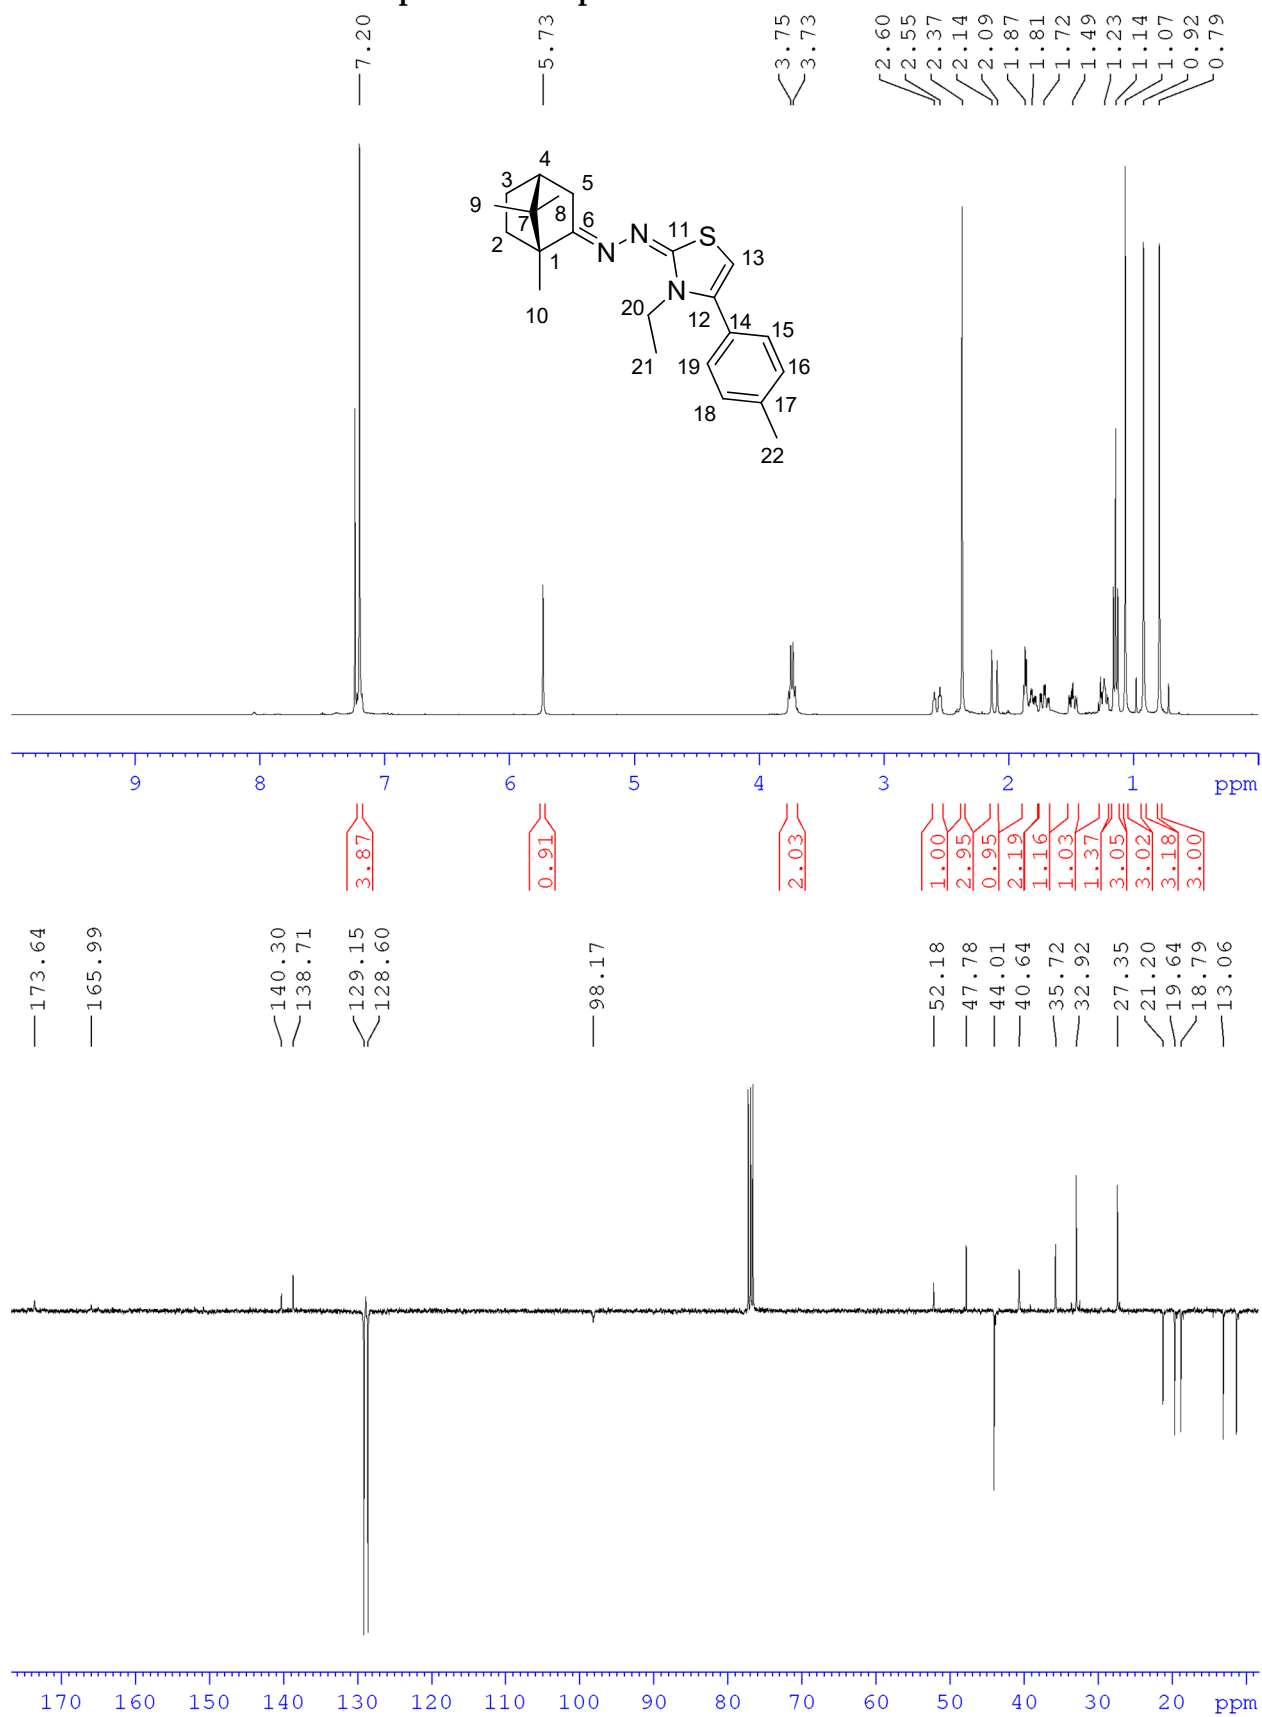

1.28.  $^1\text{H}$  NMR and  $^{13}\text{C}$  NMR spectra of compound 6d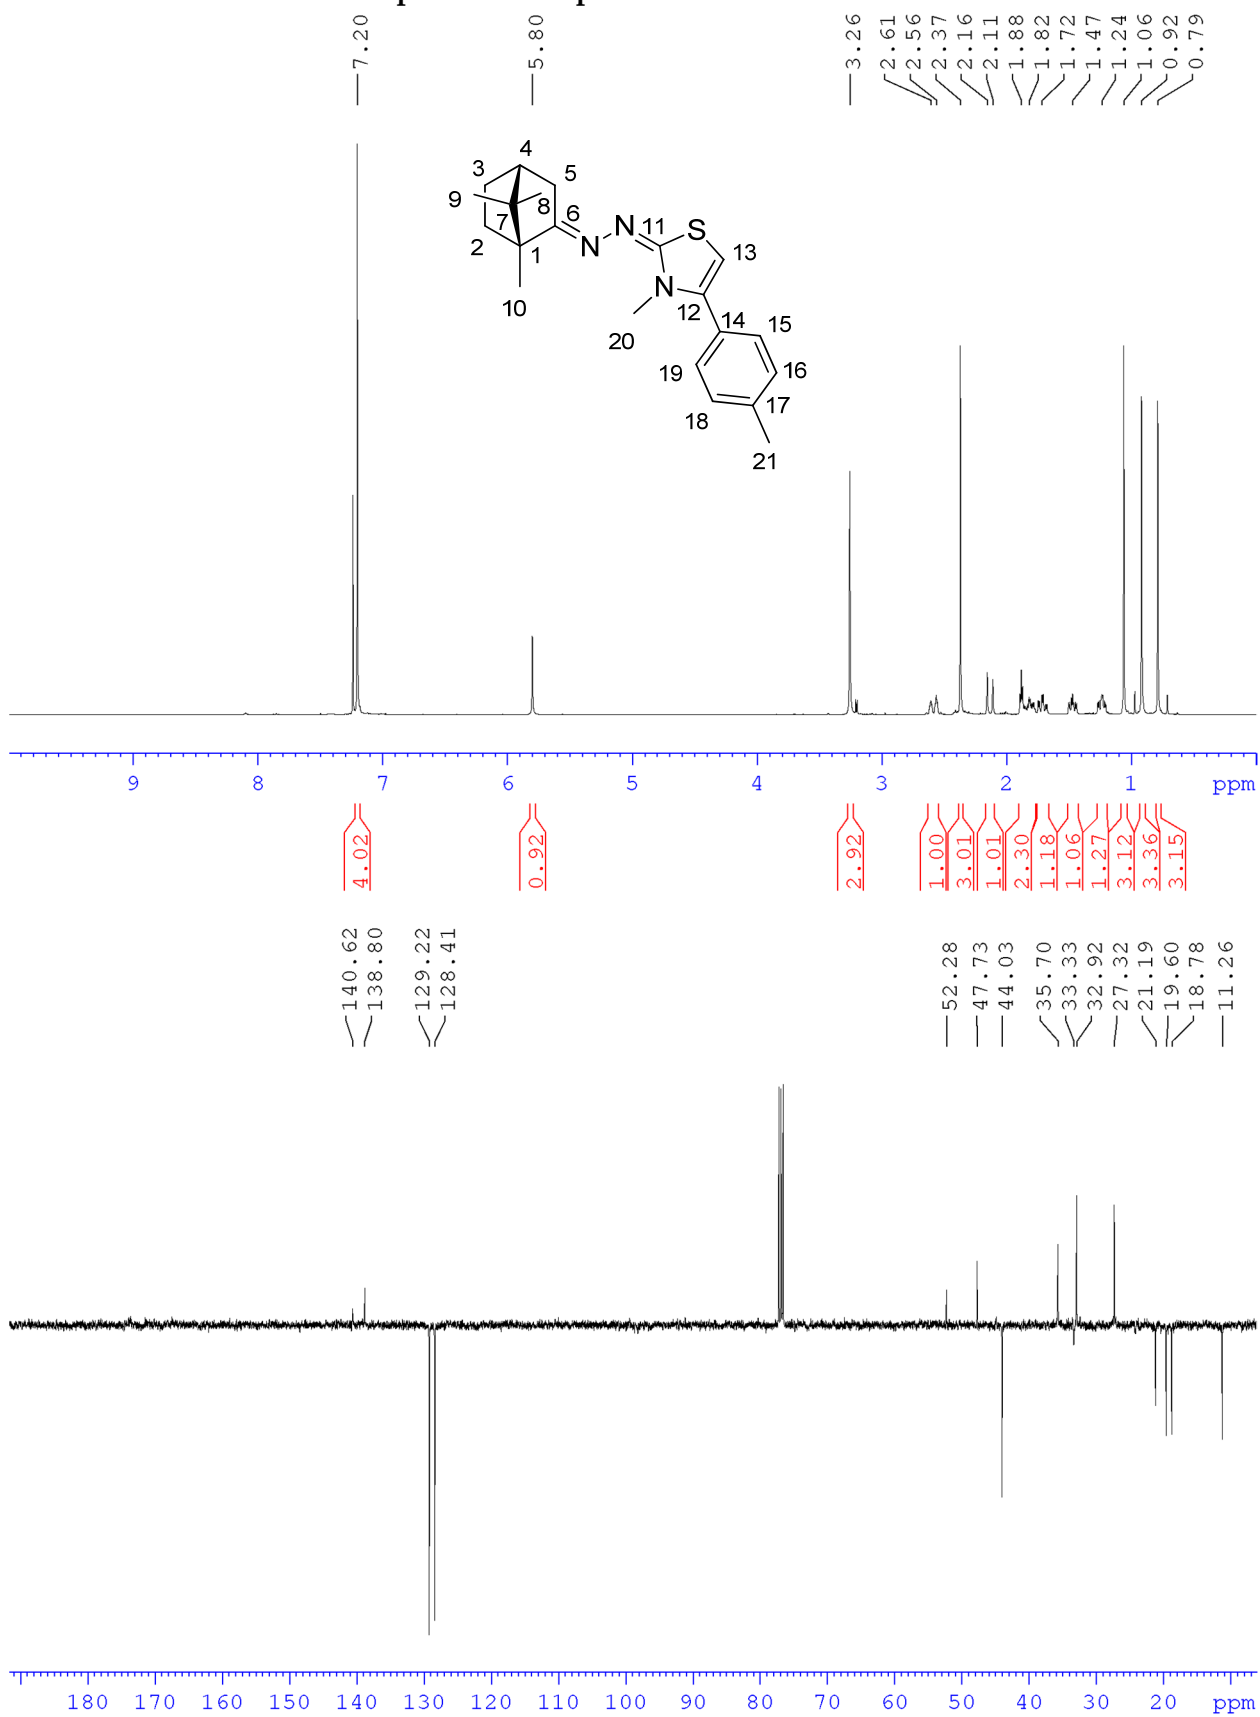

1.29.  $^1\text{H}$  NMR and  $^{13}\text{C}$  NMR spectra of compound 7a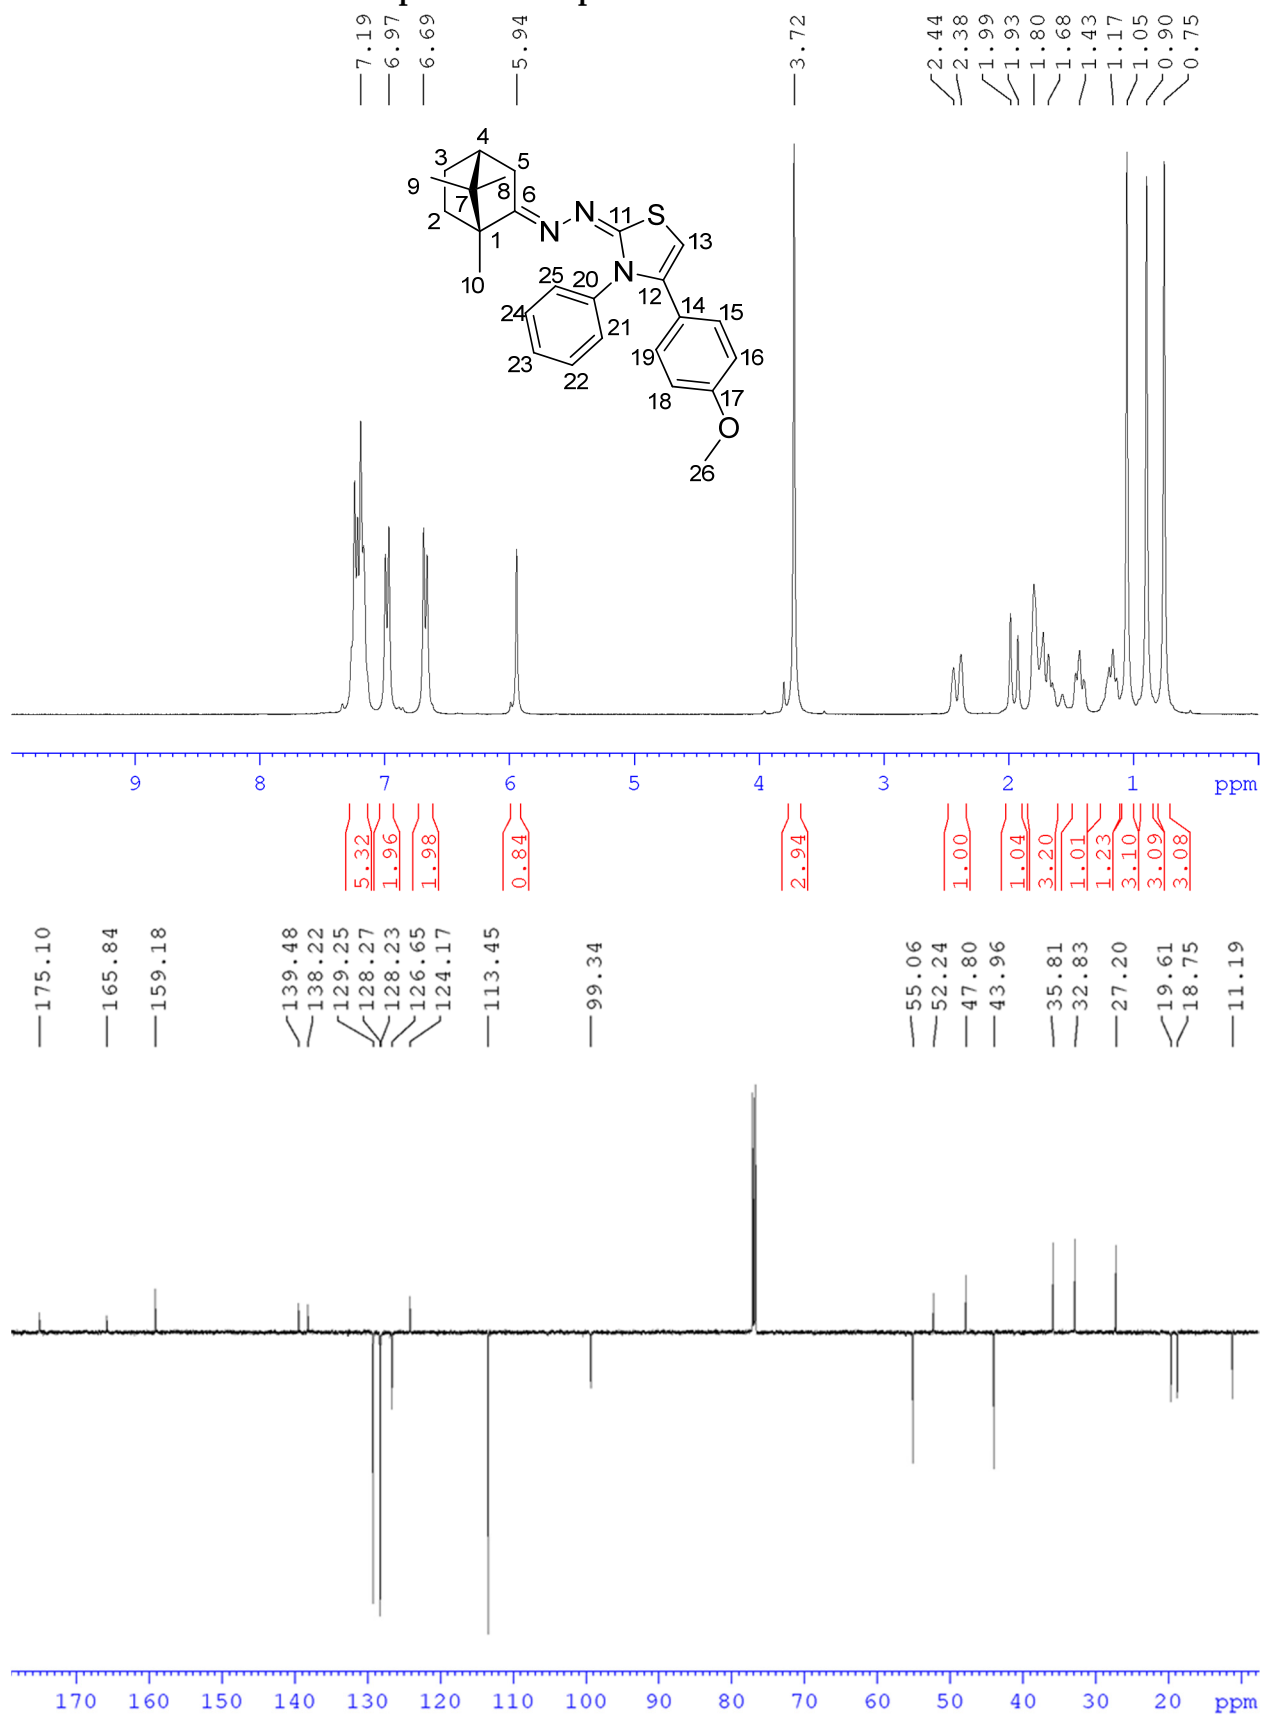

1.30.  $^1\text{H}$  NMR and  $^{13}\text{C}$  NMR spectra of compound 7b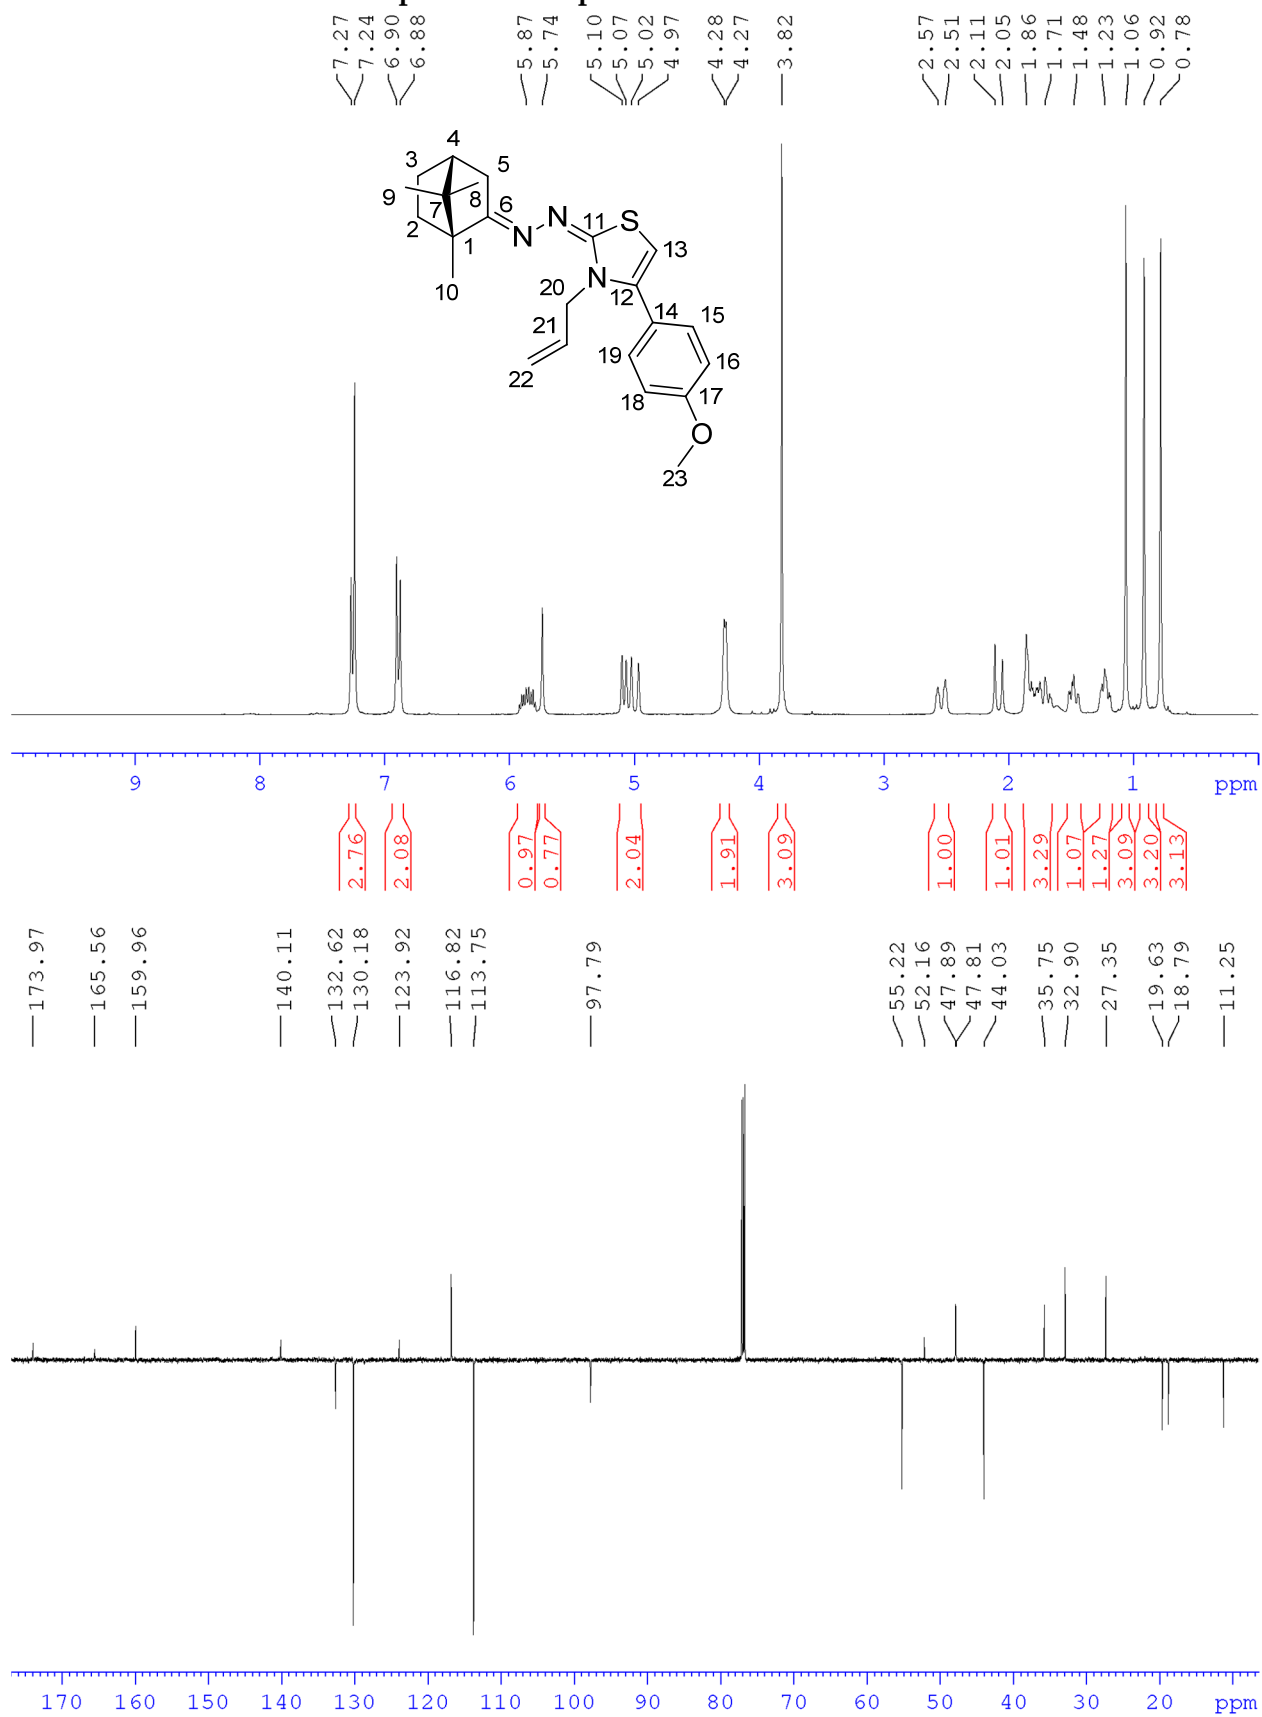

1.31.  $^1\text{H}$  NMR and  $^{13}\text{C}$  NMR spectra of compound **7c**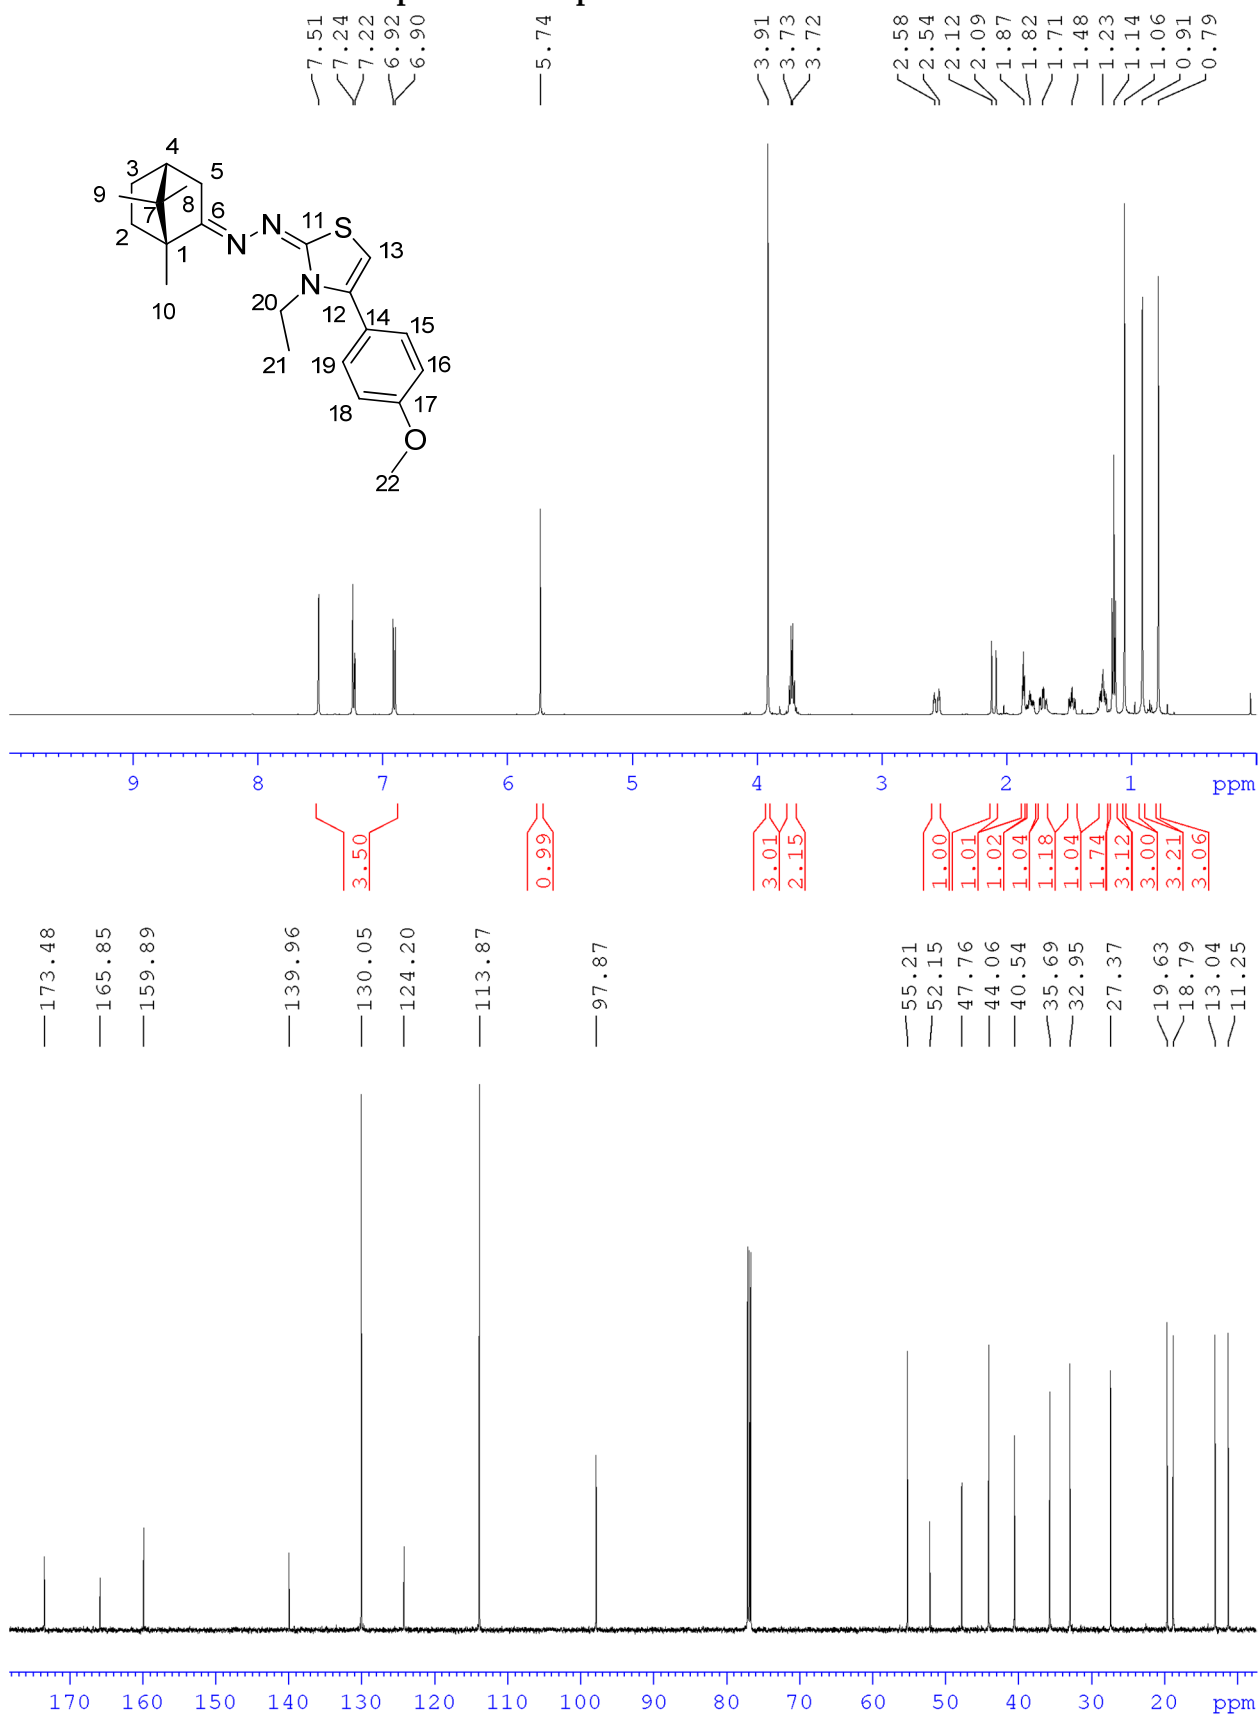



1.32.  $^1\text{H}$  NMR and  $^{13}\text{C}$  NMR spectra of compound 7d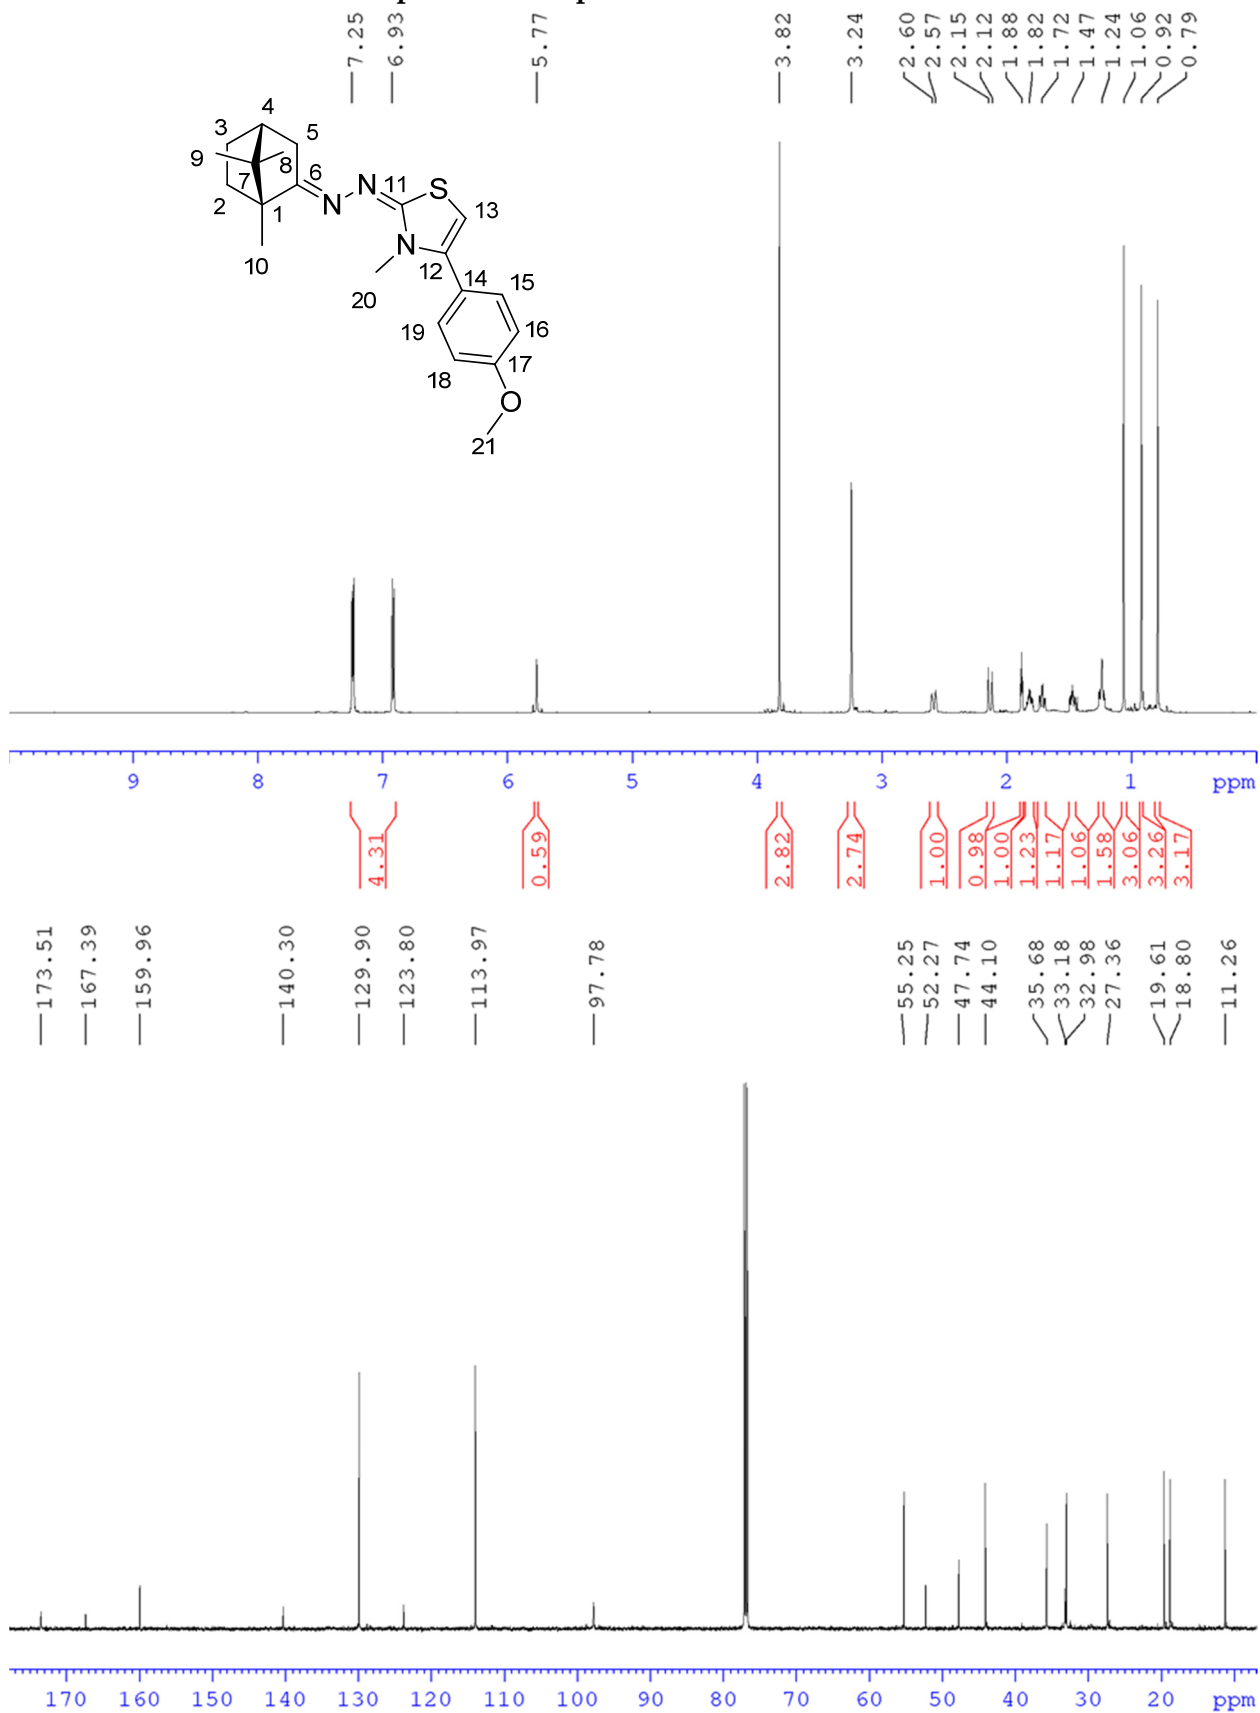

1.33.  $^1\text{H}$  NMR and  $^{13}\text{C}$  NMR spectra of compound 8a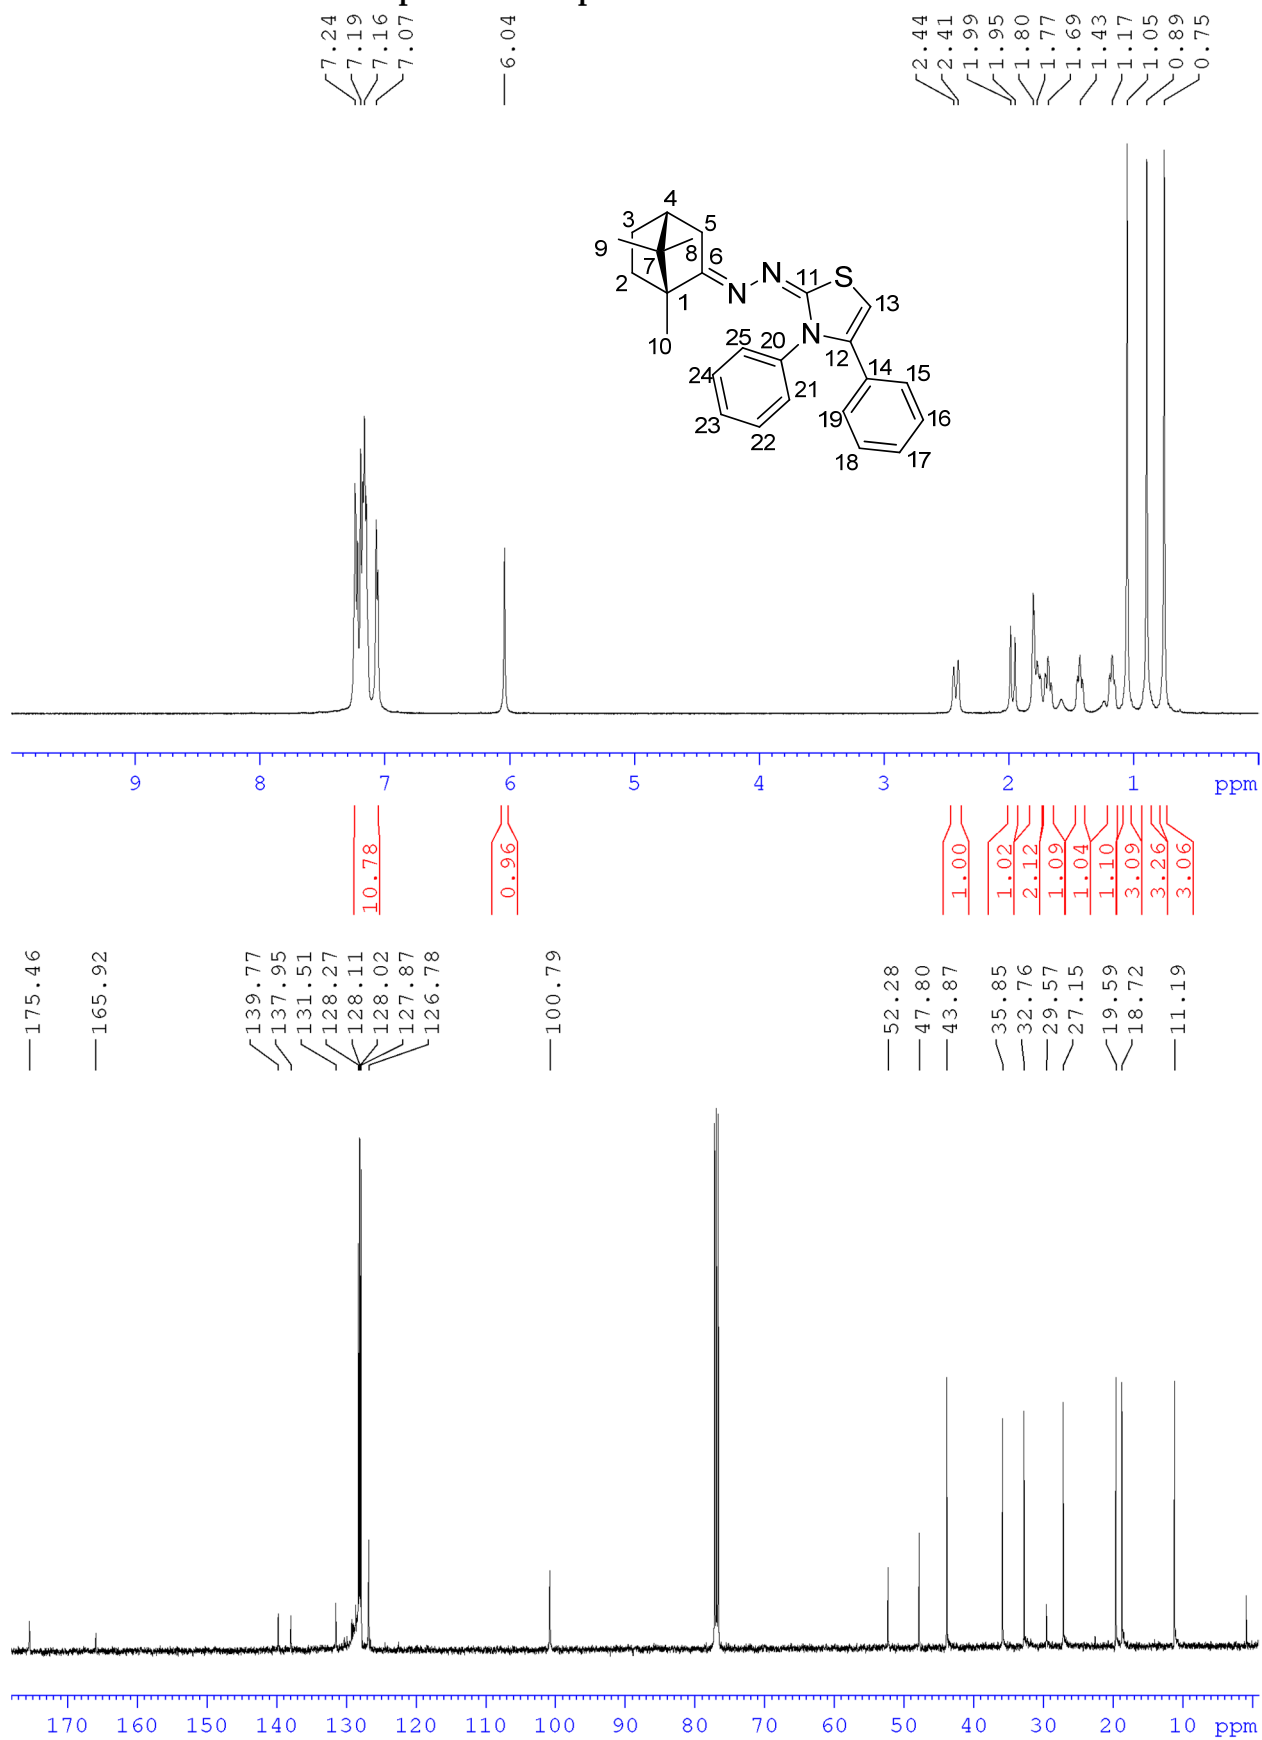

1.34.  $^1\text{H}$  NMR and  $^{13}\text{C}$  NMR spectra of compound 8b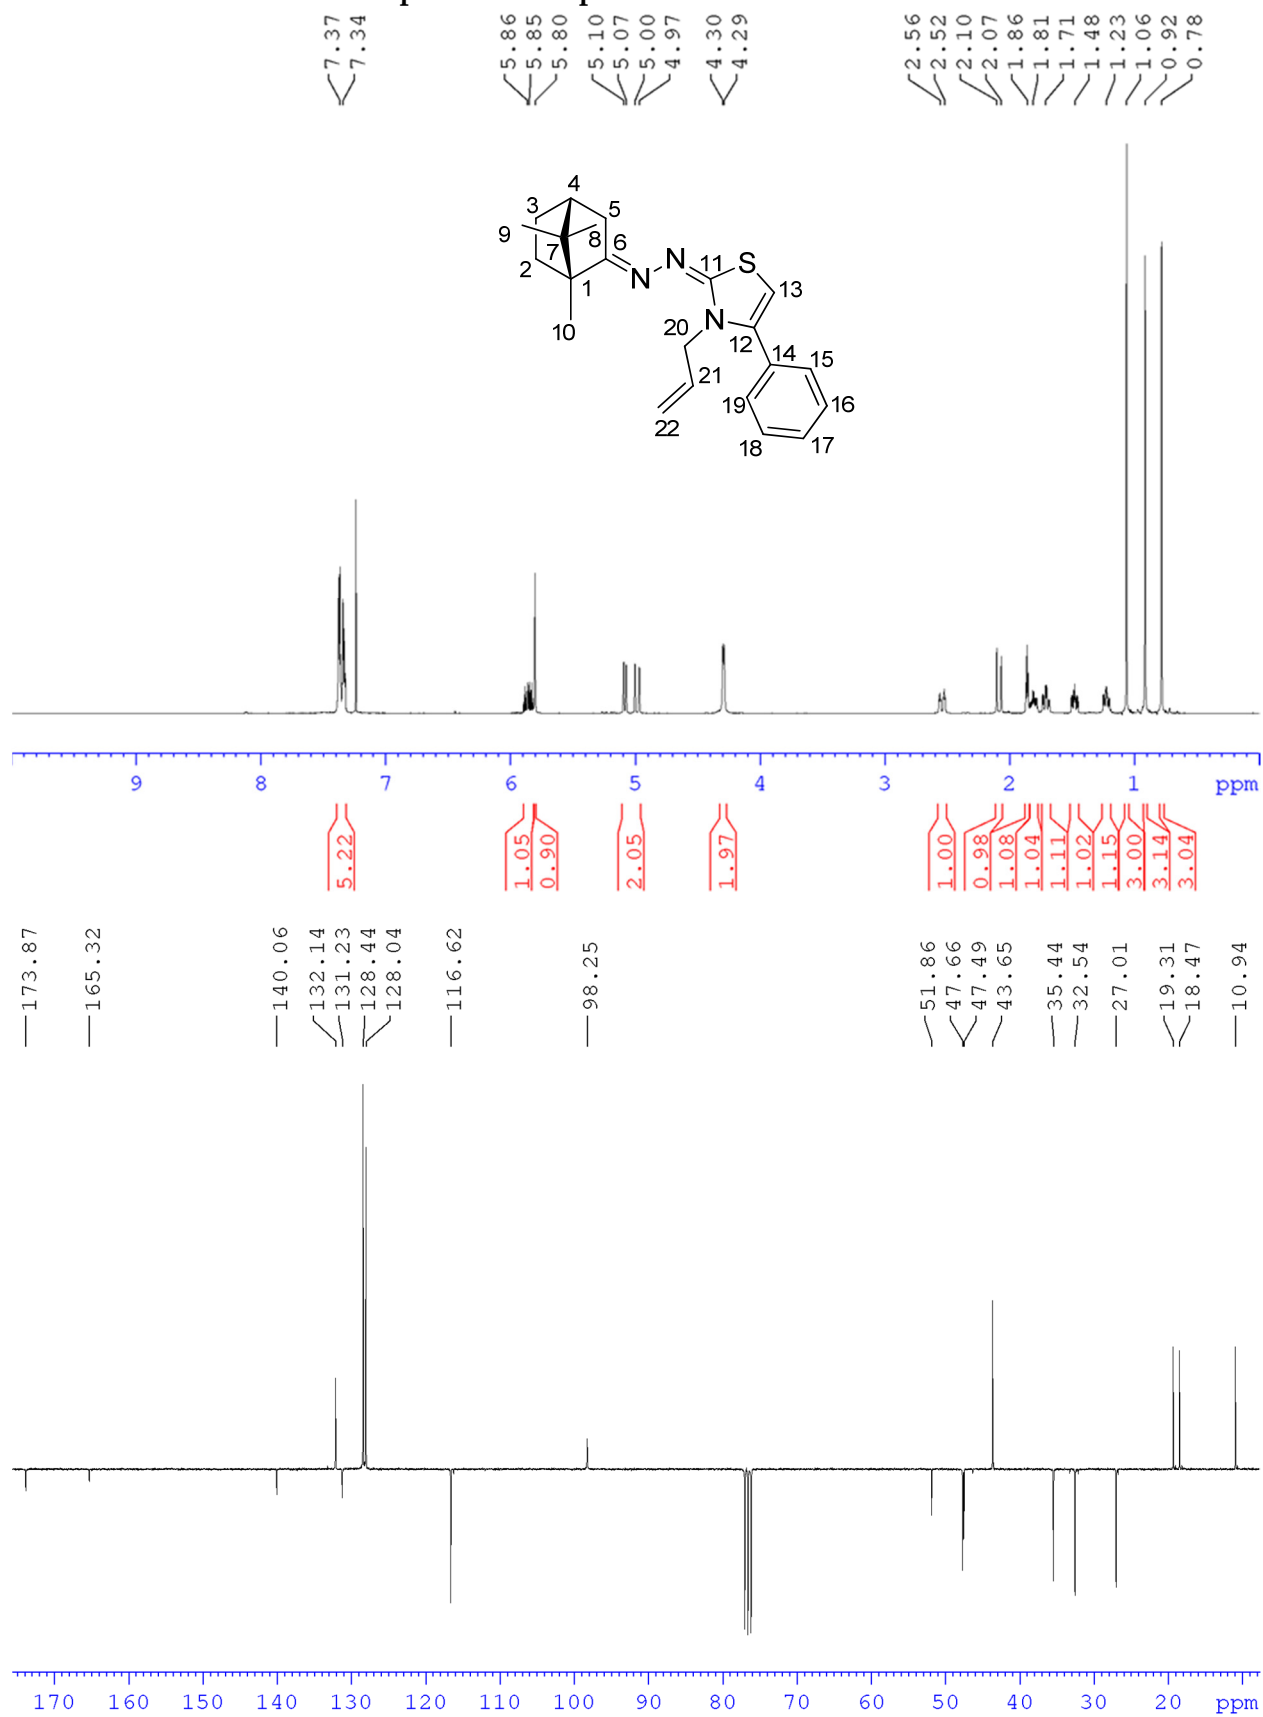

1.35.  $^1\text{H}$  NMR and  $^{13}\text{C}$  NMR spectra of compound 8c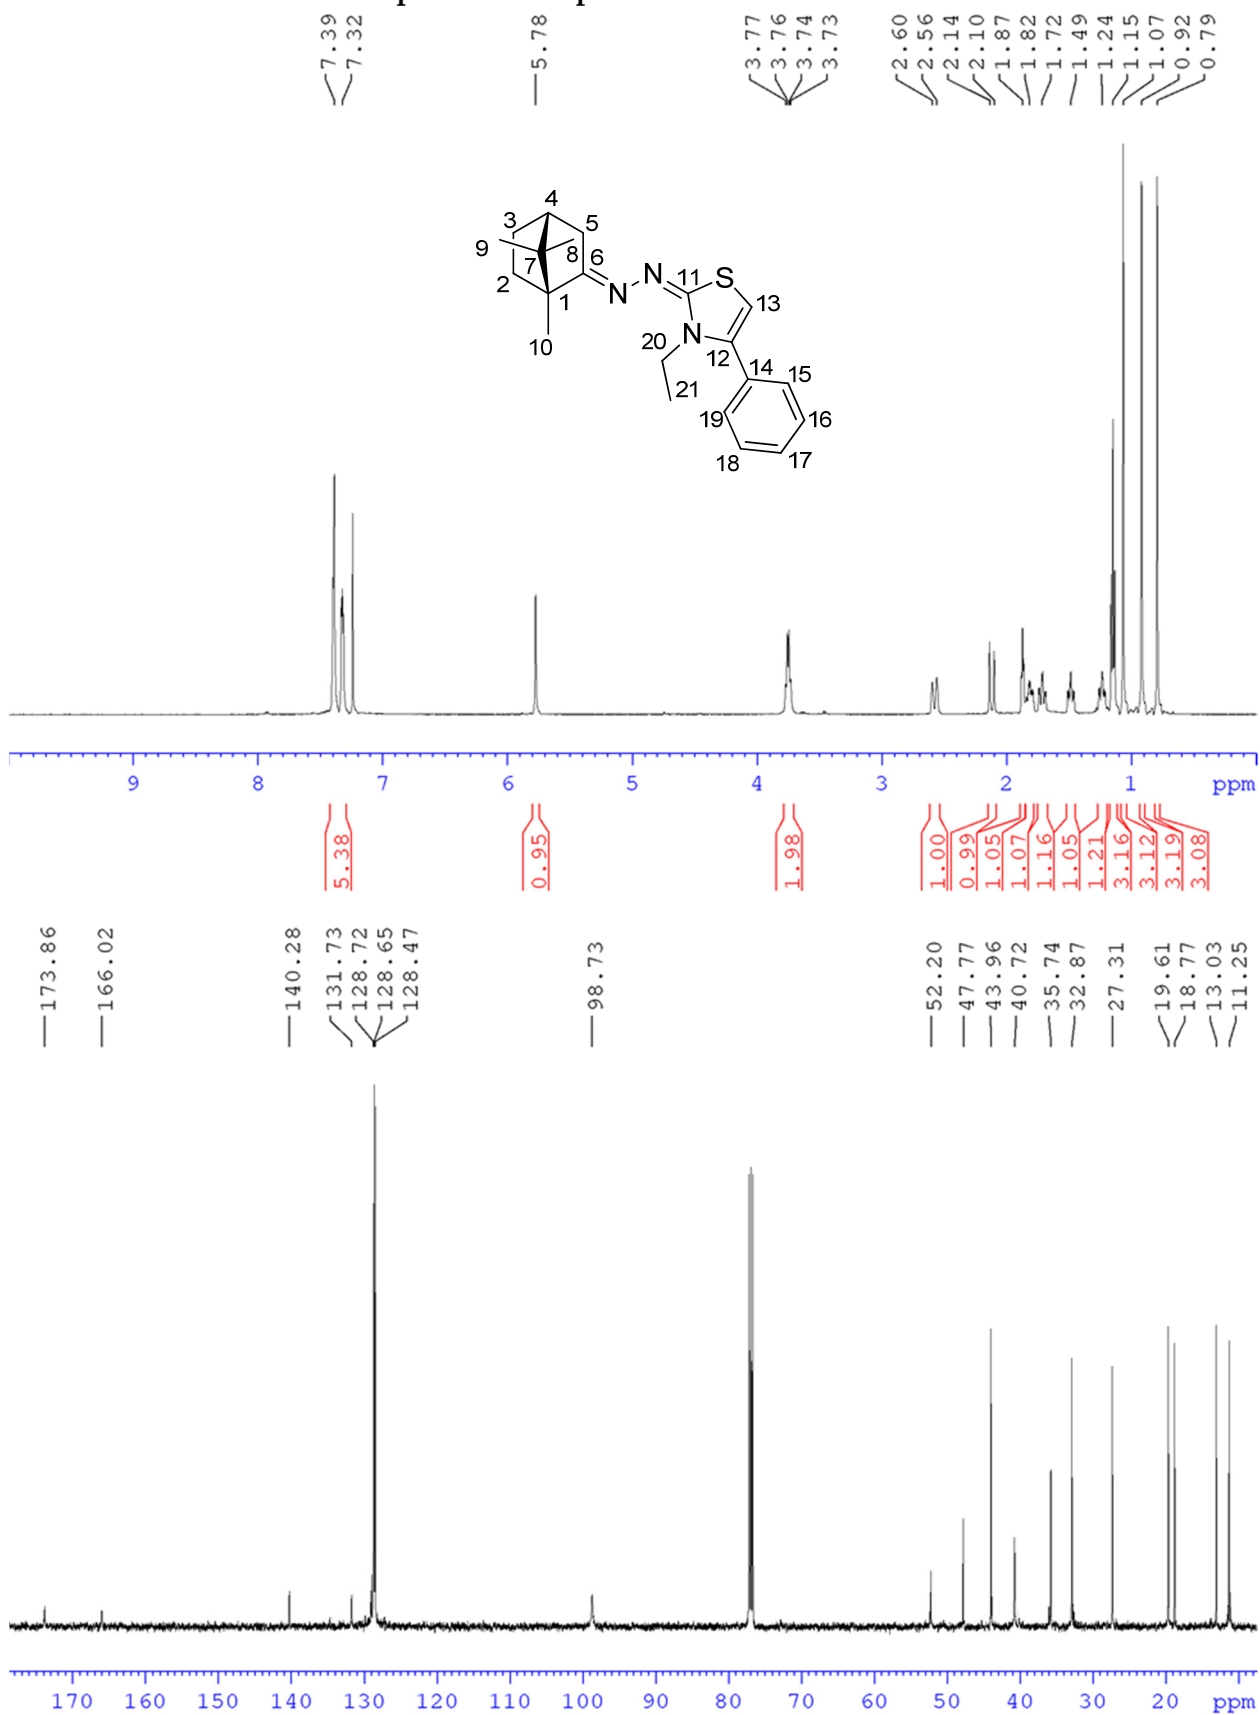

1.36.  $^1\text{H}$  NMR and  $^{13}\text{C}$  NMR spectra of compound 8d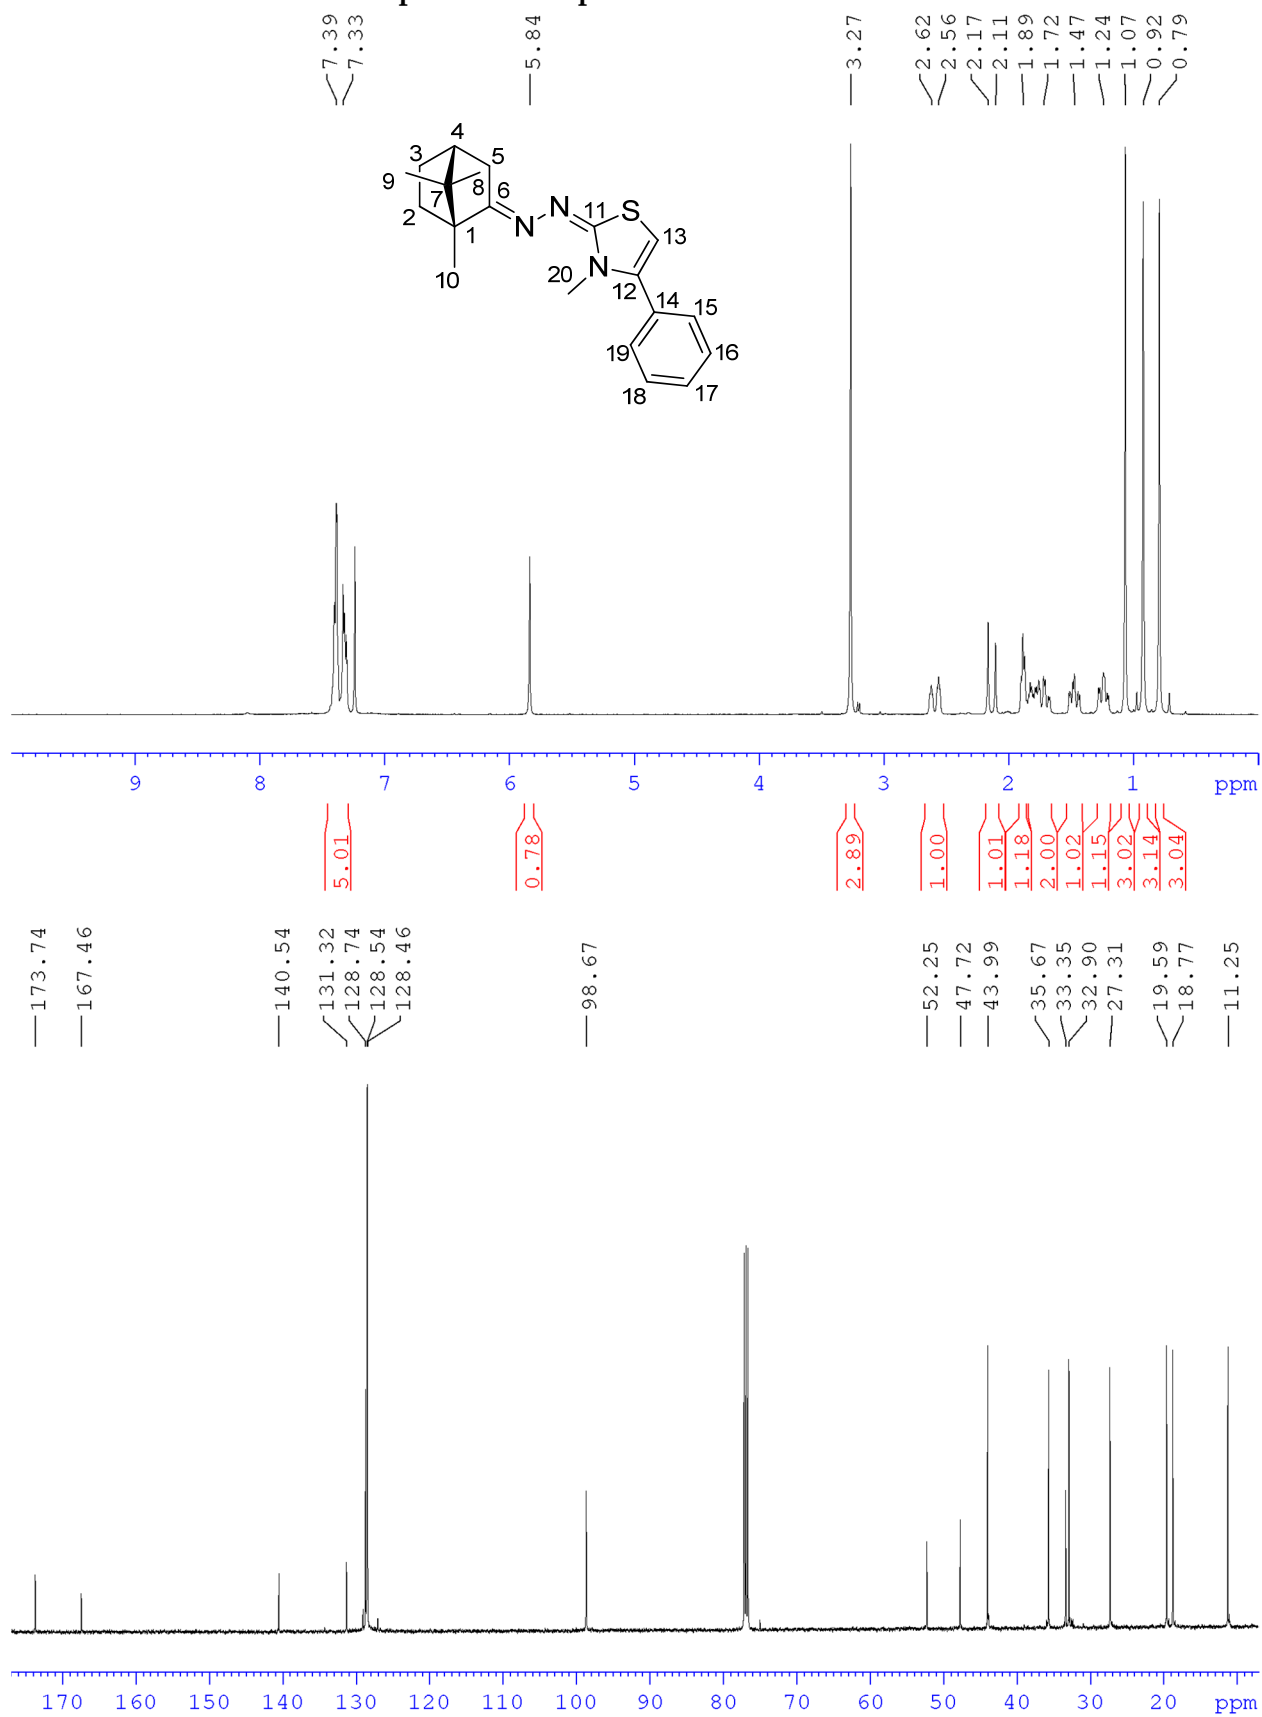

## 2. High Resolution Mass Spectra of Compounds 2a-8d

### 2.1. High Resolution Mass Spectra of Compound 2a

OV-14\_201126152211 #3 RT: 0.15 AV: 1 NL: 2.34E6  
T: + c EI Full ms [ 14.50-350.50]

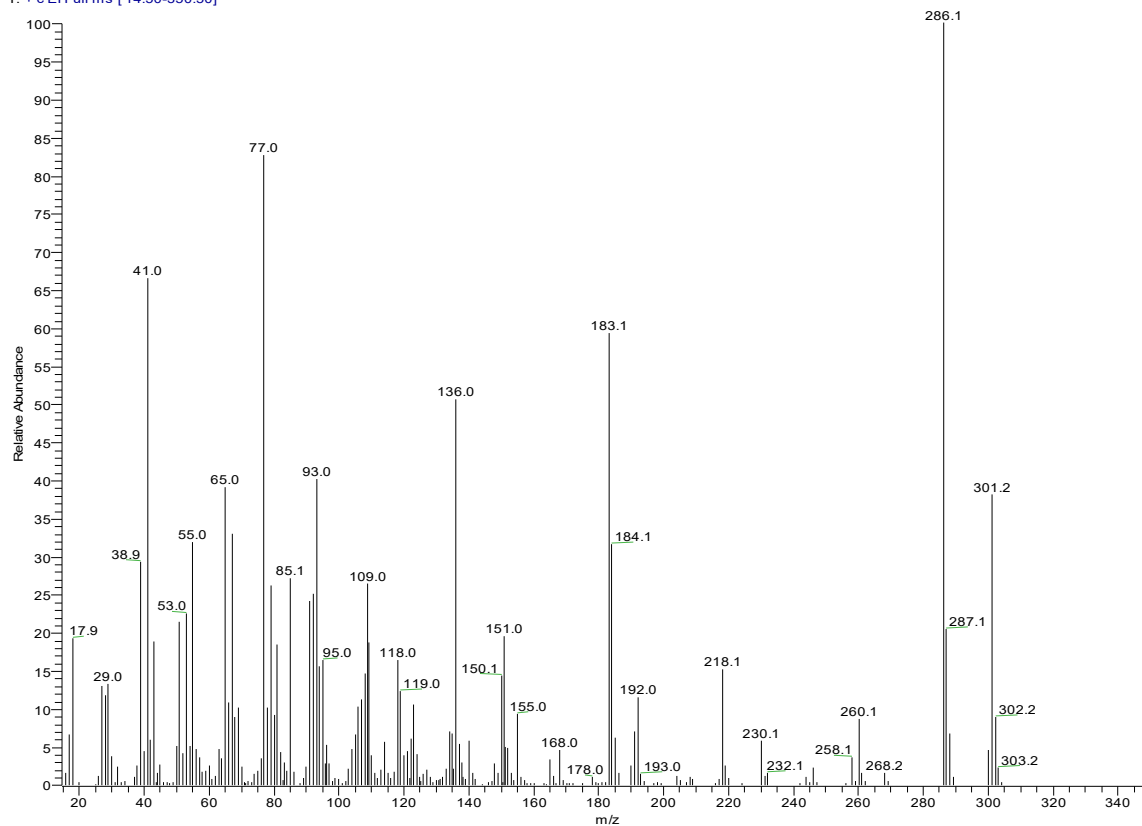

### 2.2. High Resolution Mass Spectra of Compound 2b

OV-15-1 #4 RT: 0.18 AV: 1 NL: 1.29E7  
T: + c EI Full ms [ 14.50-300.50]

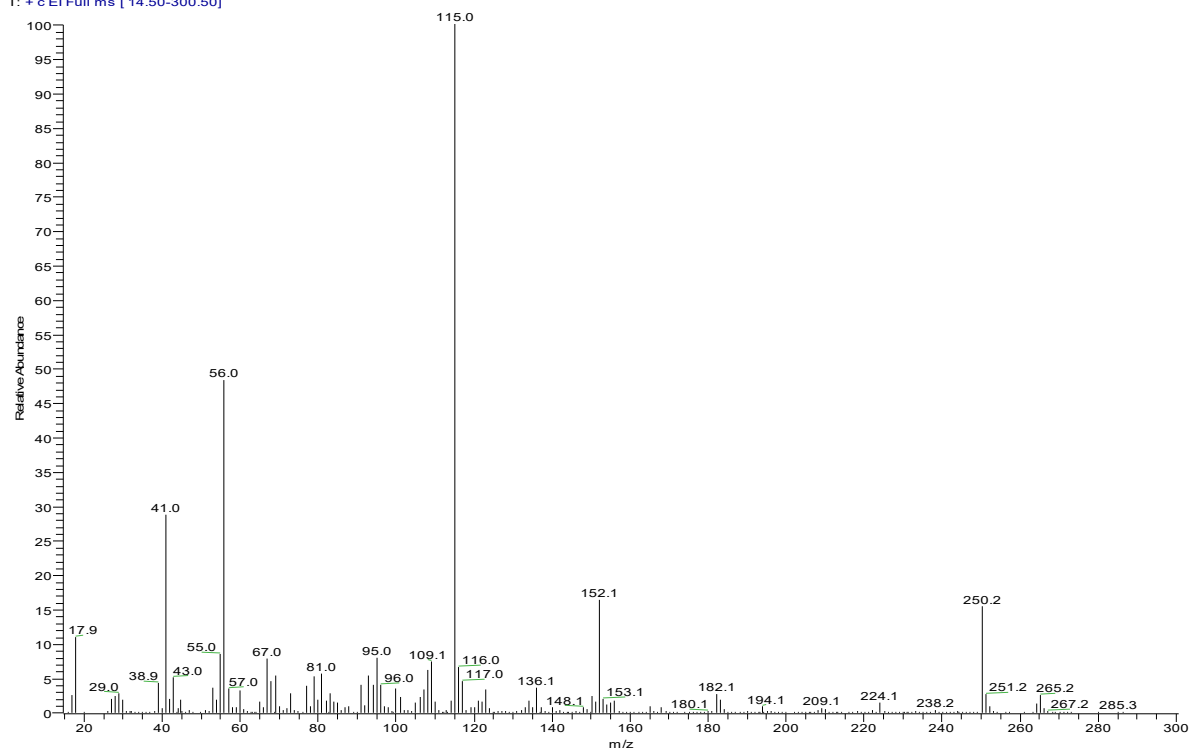

## 2.3. High Resolution Mass Spectra of Compound 2c

OV-98 #10 RT: 0.50 AV: 1 NL: 3.99E6  
T: + c EI Full ms [ 32.50-280.50]

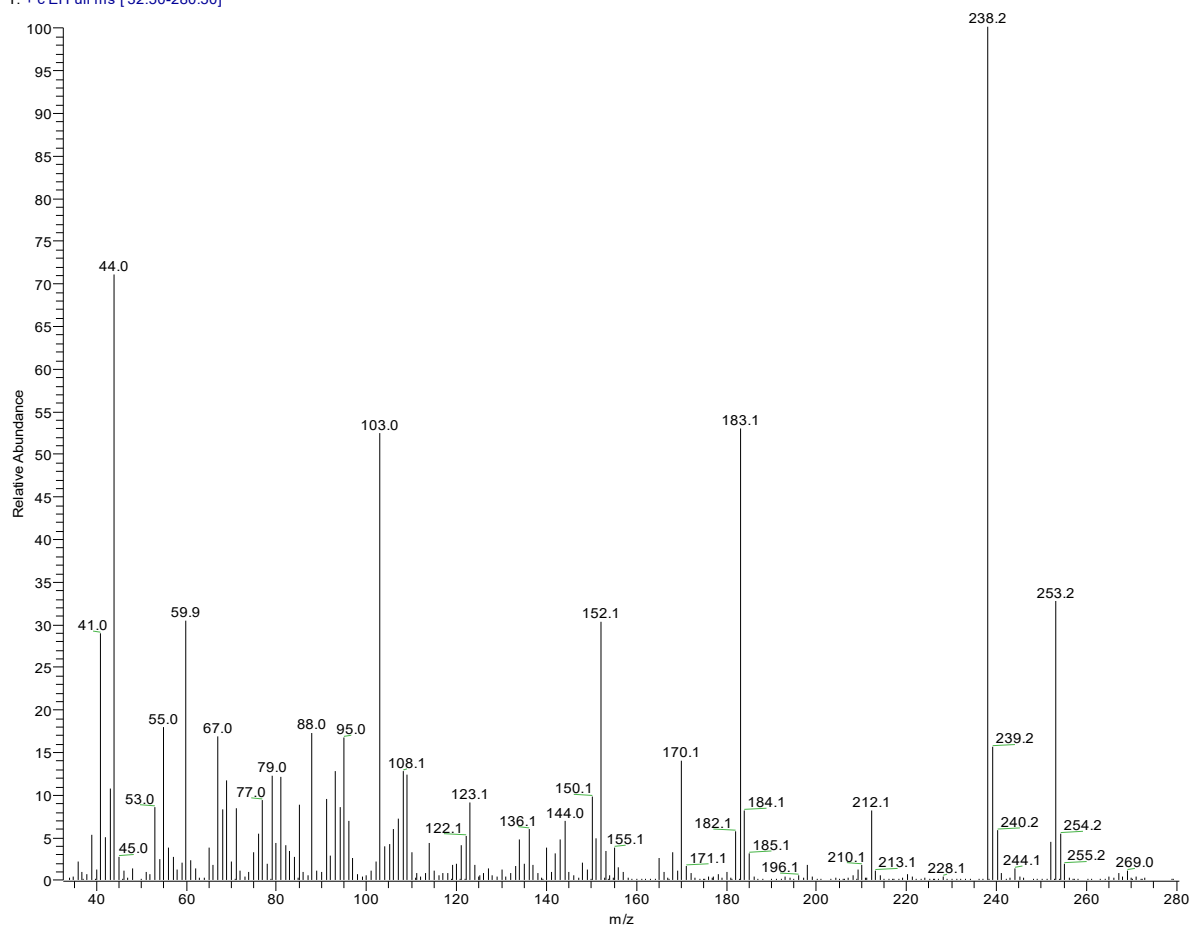

## 2.4. High Resolution Mass Spectra of Compound 2d

OV-16 #12 RT: 0.75 AV: 1 NL: 1.62E6  
T: + c EI Full ms [ 14.50-280.50]

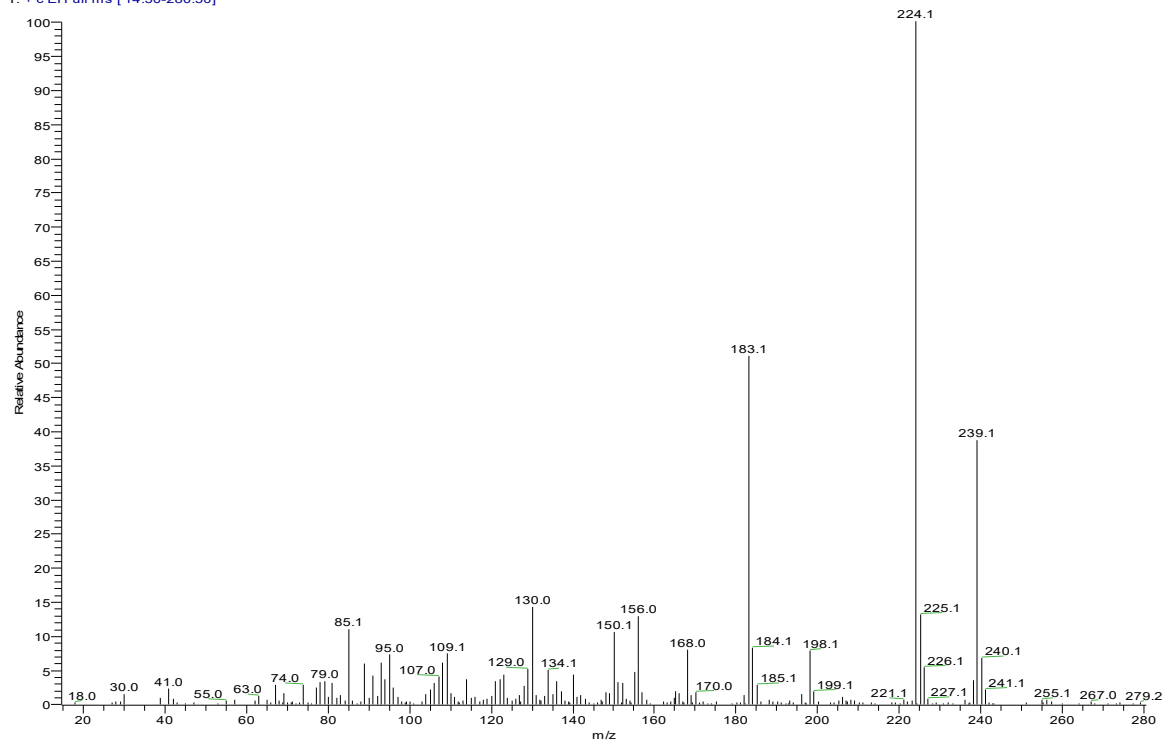

## 2.5. High Resolution Mass Spectra of Compound 2'a

OV-21 #3 RT: 0.22 AV: 1 NL: 6.87E7  
T: + c EI Full ms [ 14.50-330.50]

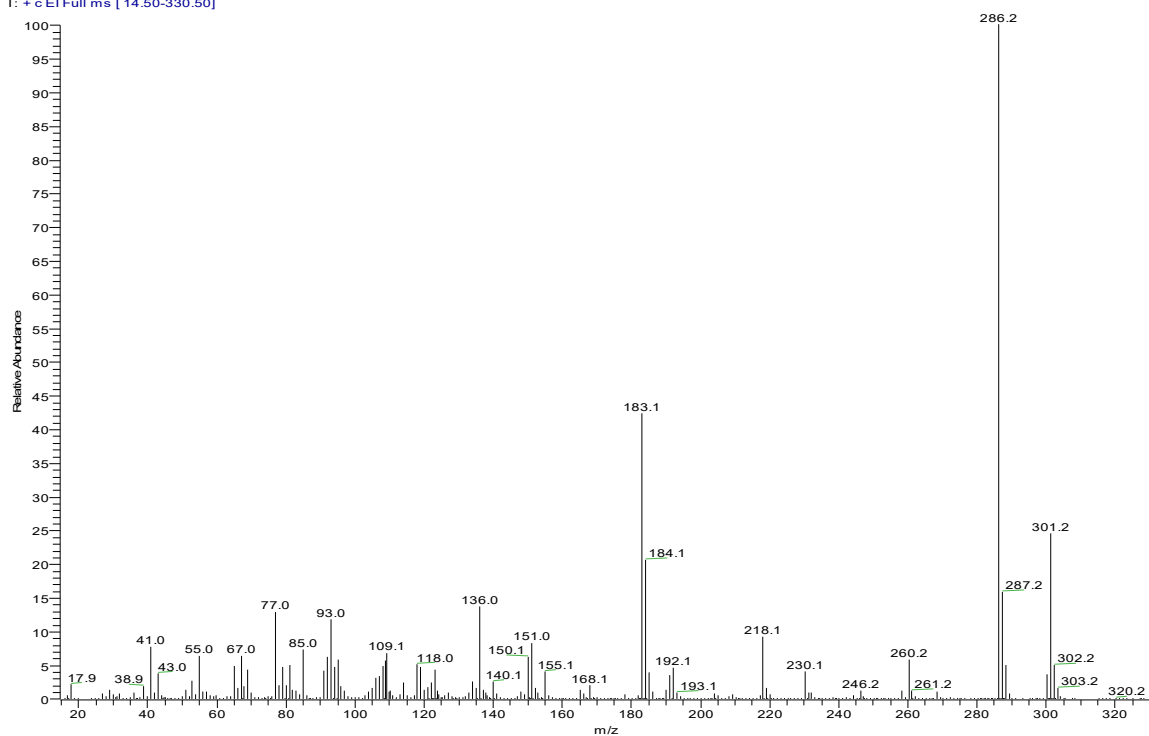

## 2.6. High Resolution Mass Spectra of Compound 2'b

OV-25 #4 RT: 0.21 AV: 1 NL: 1.37E6  
T: + c EI Full ms [ 14.50-300.50]

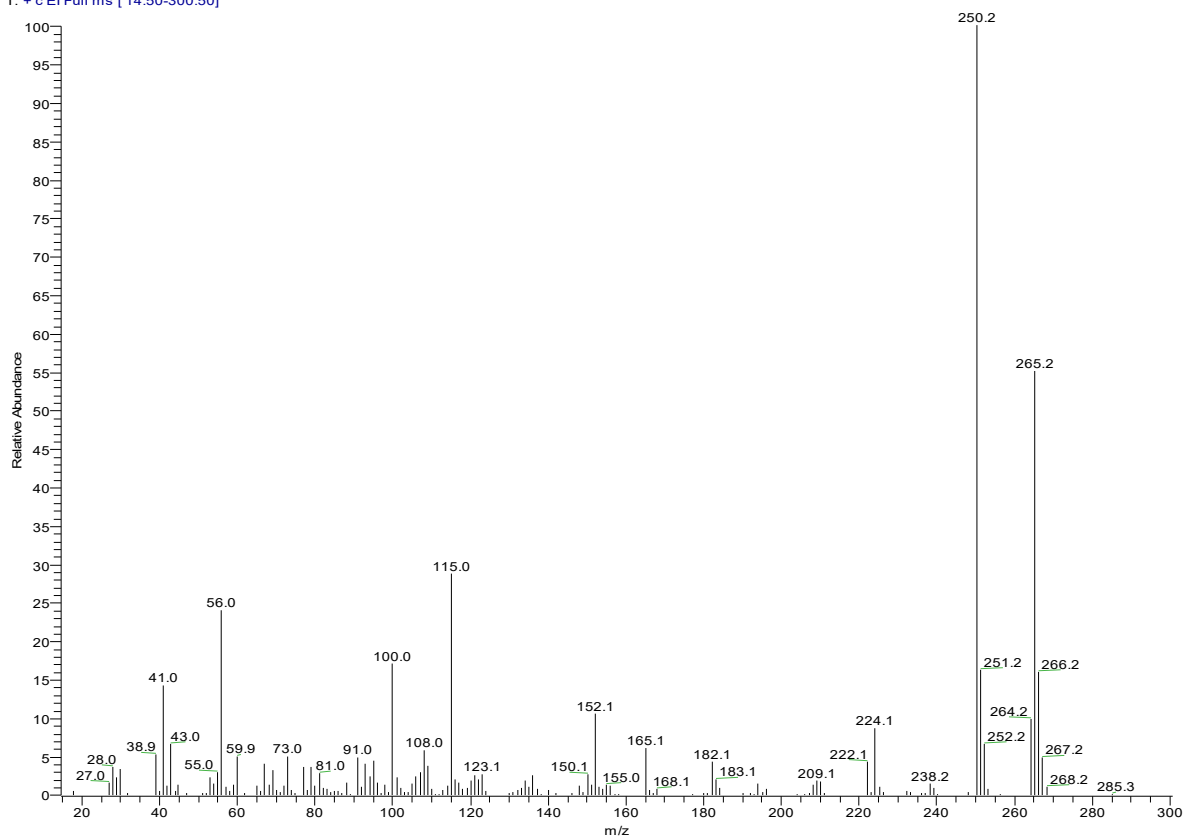



## 2.7. High Resolution Mass Spectra of Compound 2'c

OV-22 #10 RT: 0.58 AV: 1 NL: 6.96E7  
T: + c EI Full ms [ 14.50-280.50]

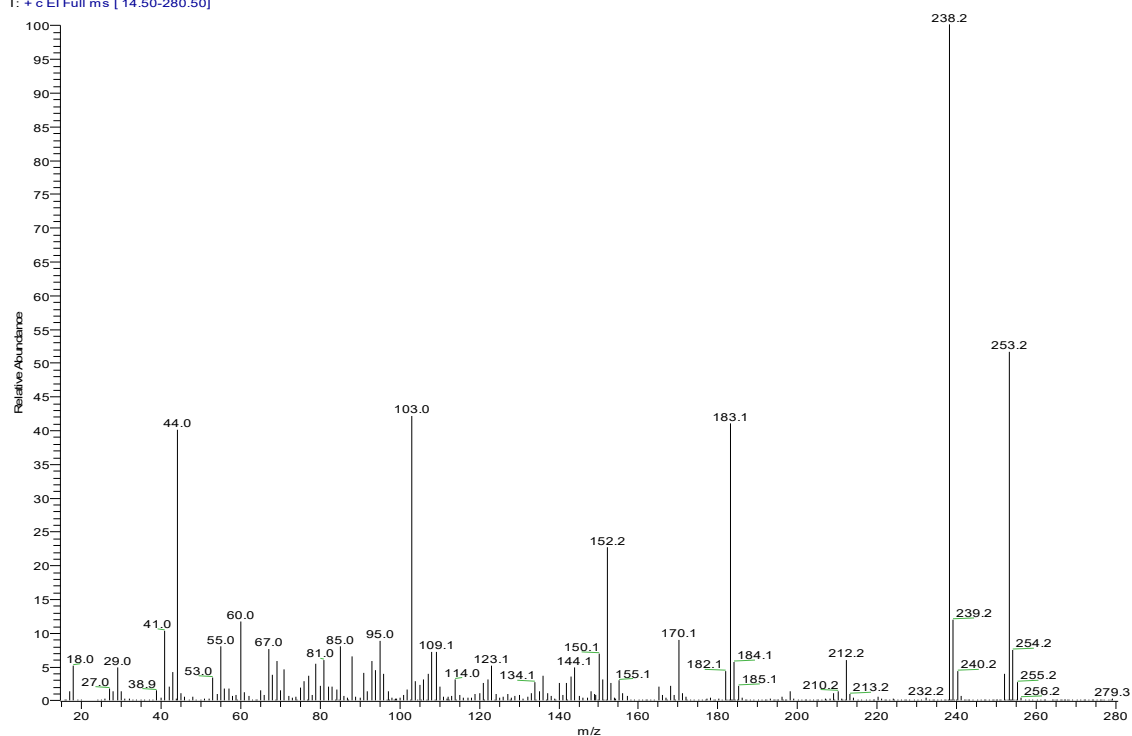

## 2.8. High Resolution Mass Spectra of Compound 2'd

OV-24 #6 RT: 0.34 AV: 1 NL: 1.03E7  
T: + c EI Full ms [ 14.50-280.50]

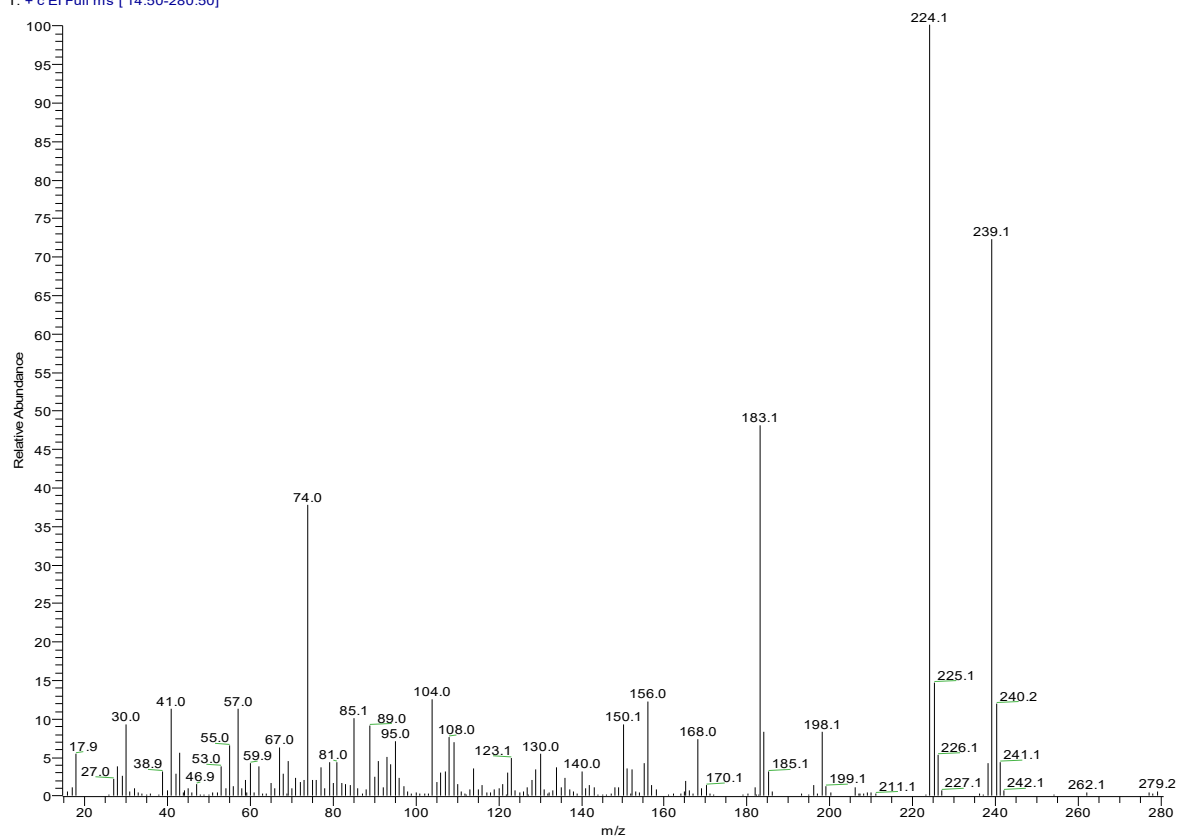

## 2.9. High Resolution Mass Spectra of Compound 3a

OV-17 #13 RT: 0.89 AV: 1 NL: 1.10E7  
T: + c EI Full ms [14.50-370.50]

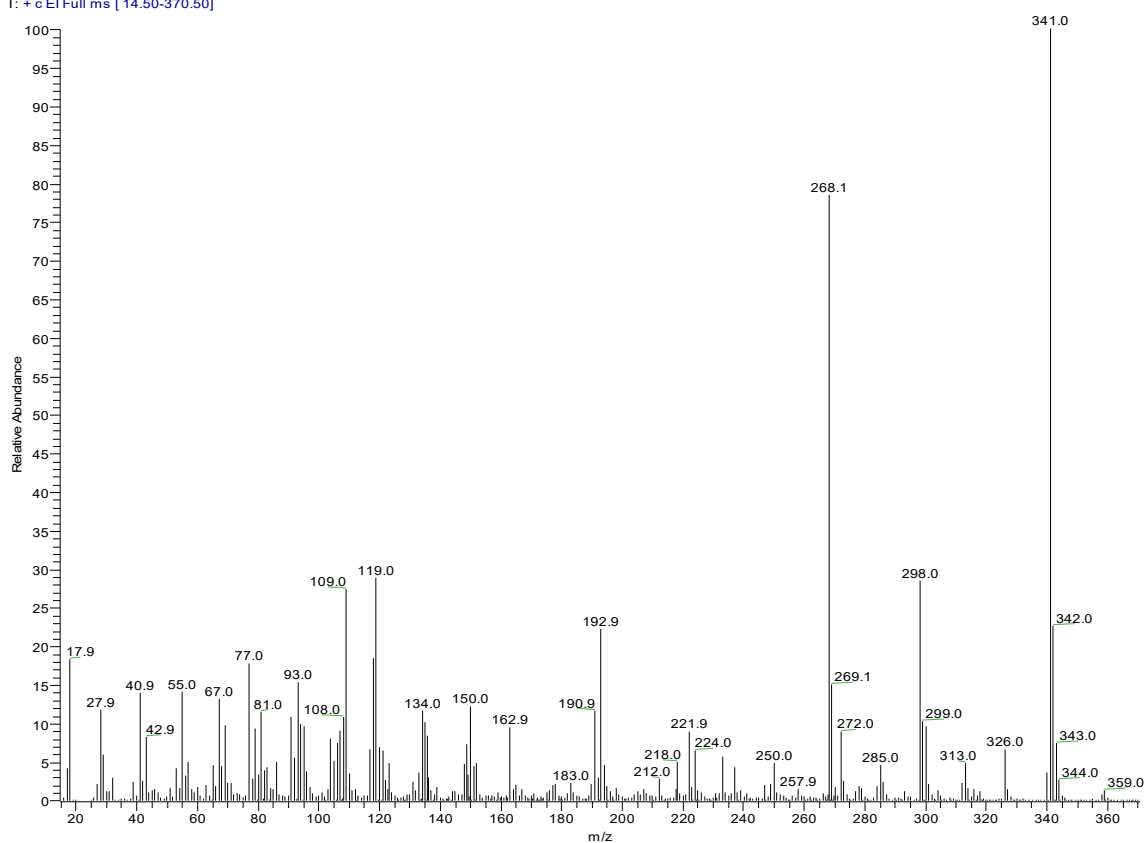

## 2.10. High Resolution Mass Spectra of Compound 3b

OV-18 #3 RT: 0.11 AV: 1 NL: 6.59E5  
T: + c EI Full ms [32.50-330.50]

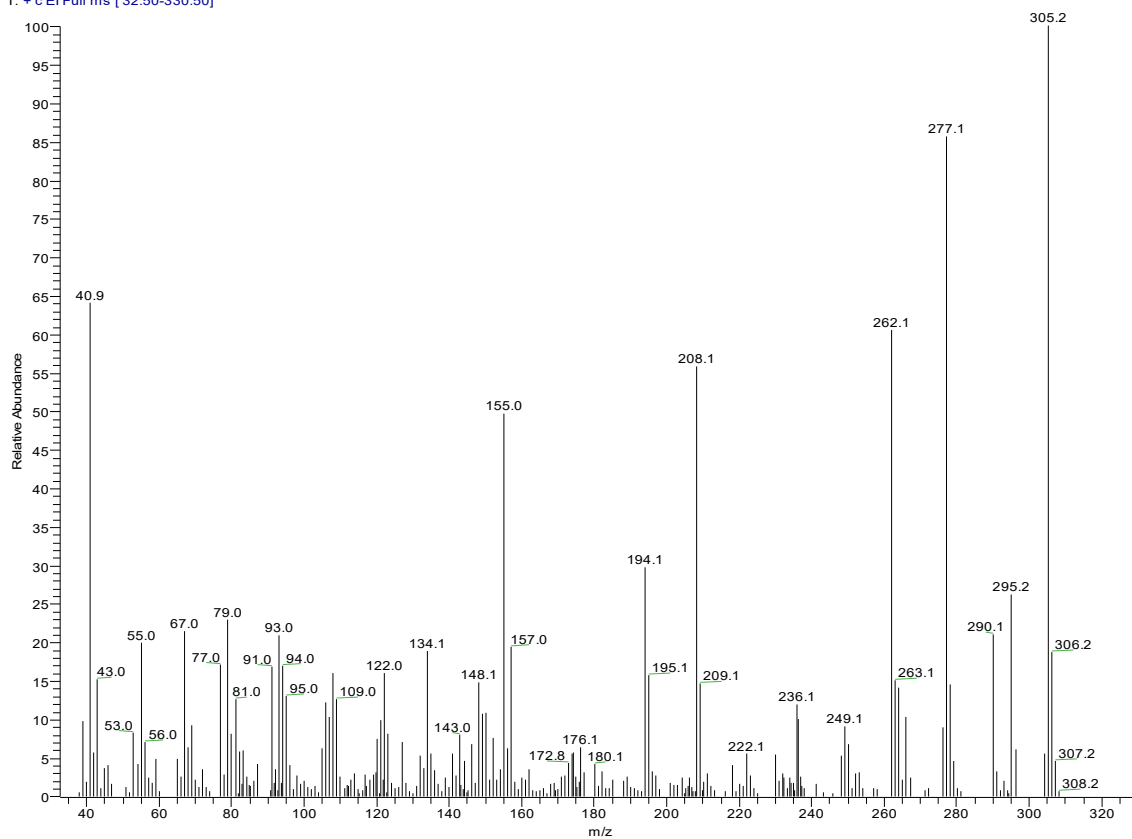

## 2.11. High Resolution Mass Spectra of Compound 3c

OV-13 #7 RT: 0.43 AV: 1 NL: 1.37E6  
T: + c EI Full ms [ 14.50-330.50]

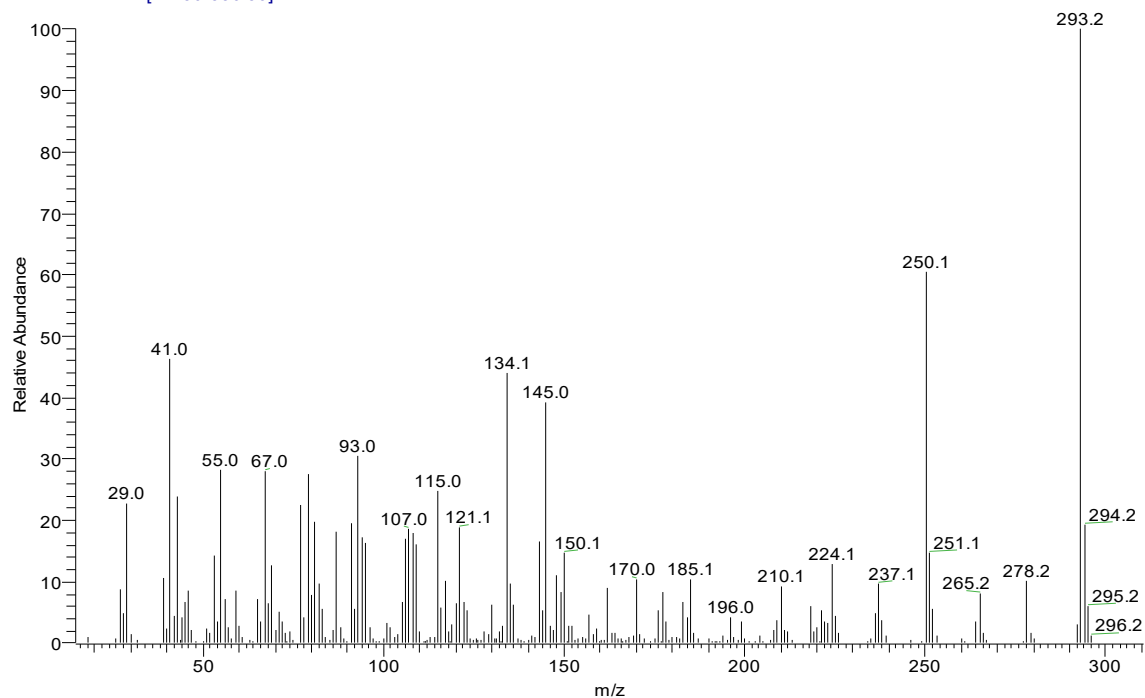

## 2.12. High Resolution Mass Spectra of Compound 3d

Ov\_19 #5 RT: 0.29 AV: 1 NL: 9.46E6  
T: + c EI Full ms [ 14.50-350.50]

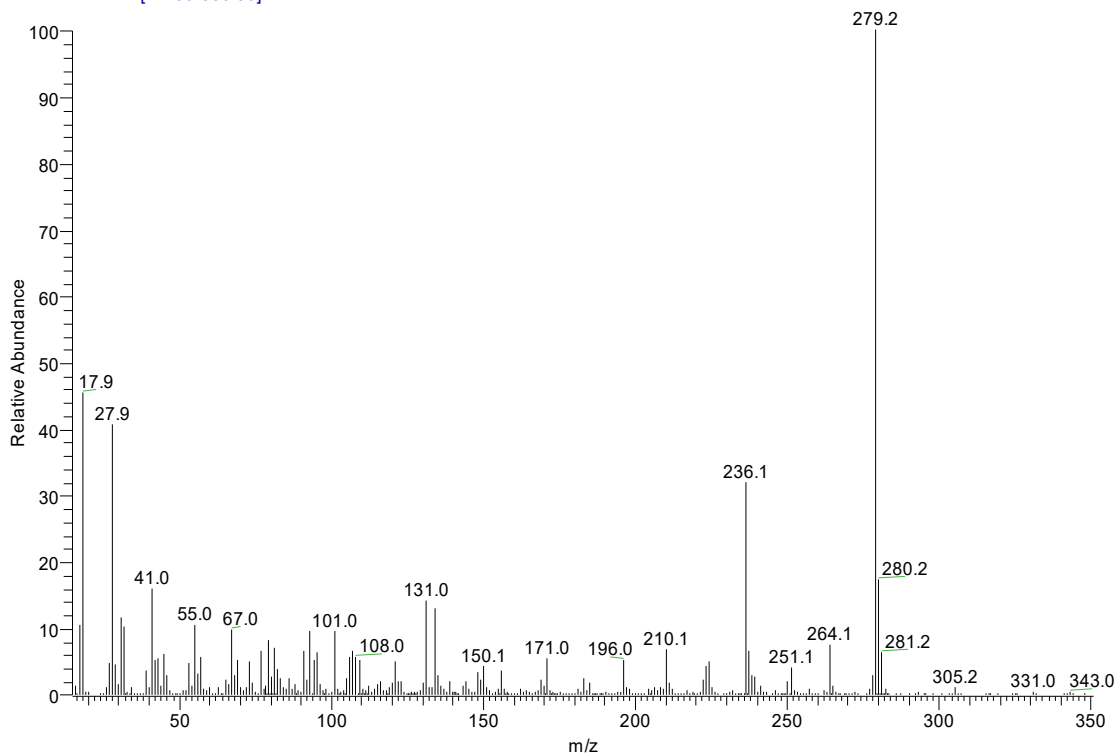

## 2.13. High Resolution Mass Spectra of Compound 3'a

OV-26 #12 RT: 0.97 AV: 1 NL: 9.78E6  
T: +c EI Full ms [14.50-380.50]

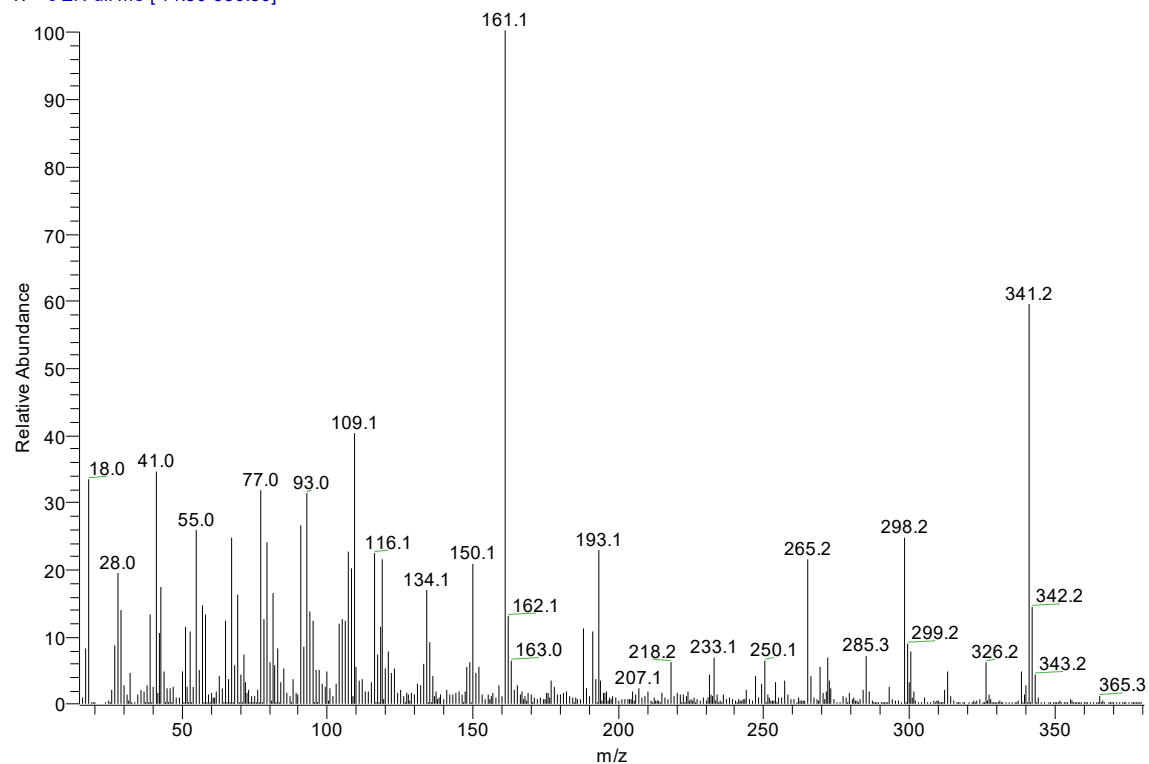

## 2.14. High Resolution Mass Spectra of Compound 3'b

OV-30 #4 RT: 0.22 AV: 1 NL: 5.30E6  
T: +c EI Full ms [14.50-340.50]

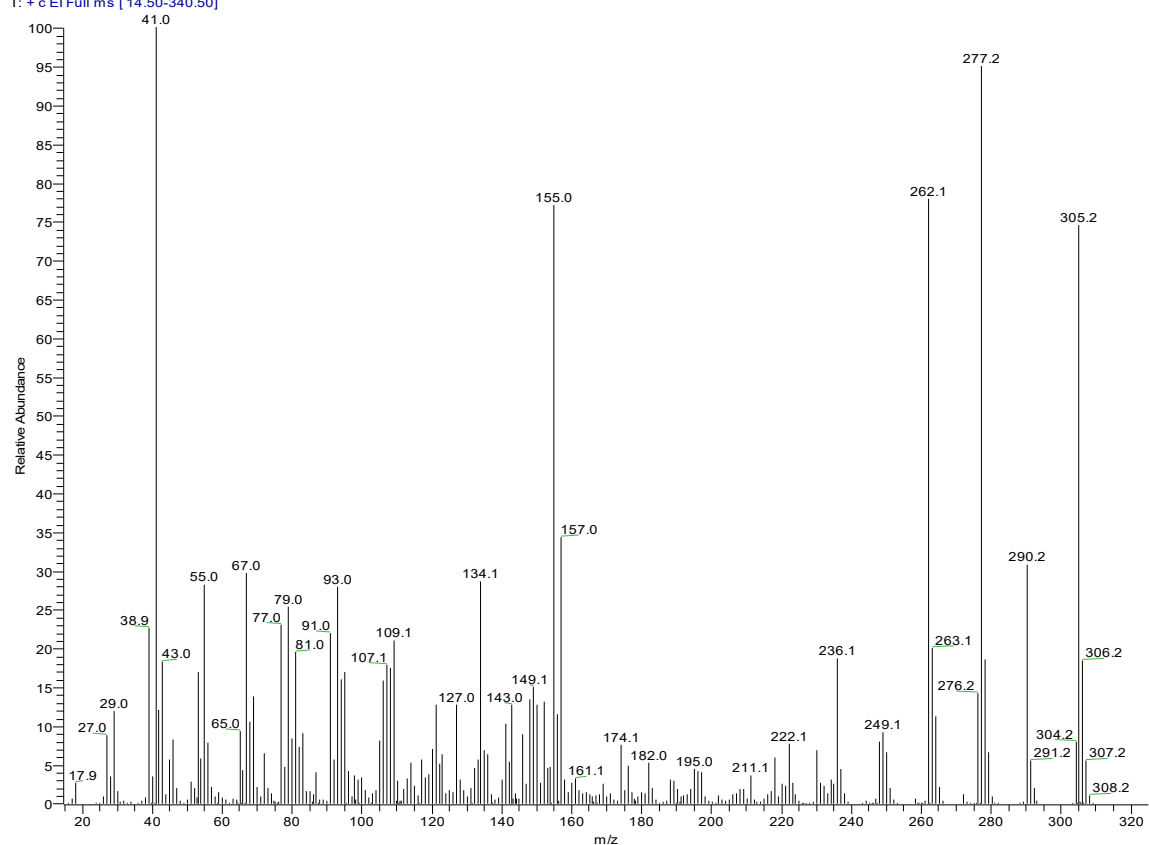

## 2.15. High Resolution Mass Spectra of Compound 3'c

OV-27 #3 RT: 0.11 AV: 1 NL: 4.15E6  
T: + c EI Full ms [ 32.50-350.50]

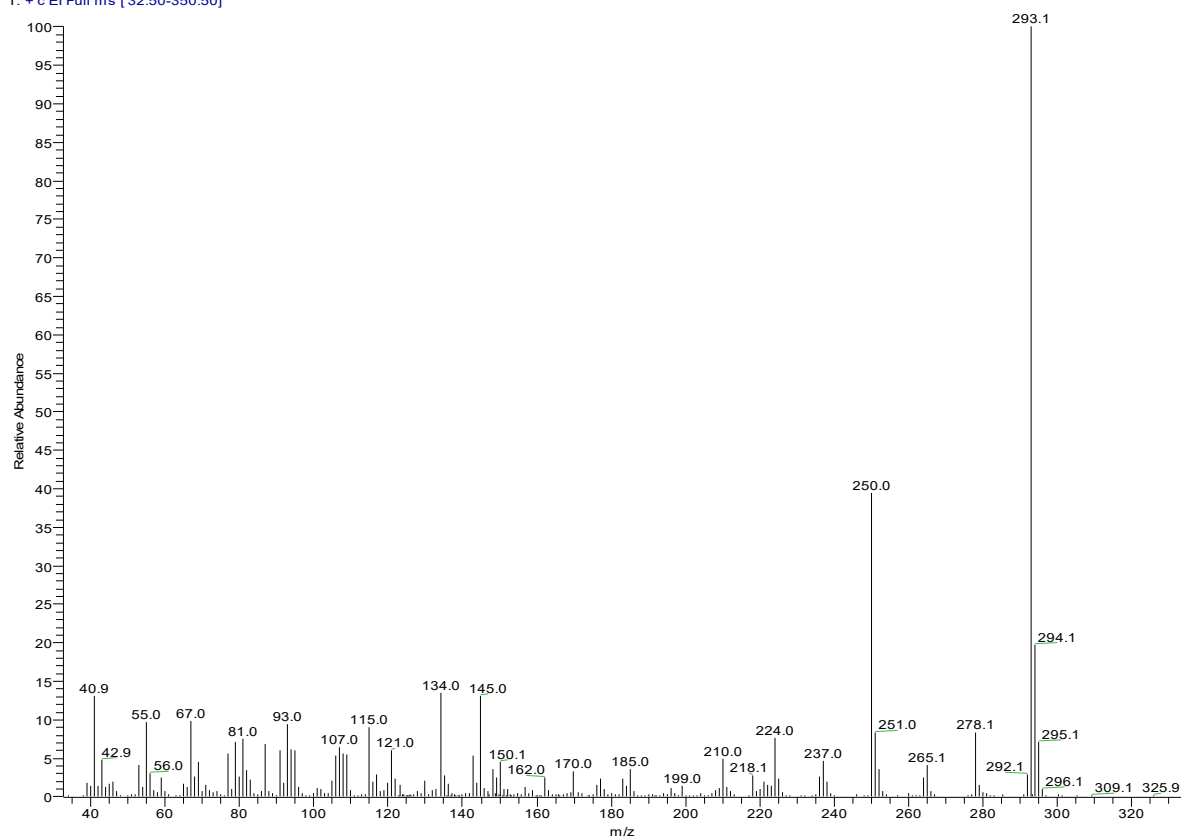

## 2.16. High Resolution Mass Spectra of Compound 3'd

OV-29 #3 RT: 0.21 AV: 1 NL: 2.07E6  
T: + c EI Full ms [ 14.50-300.50]

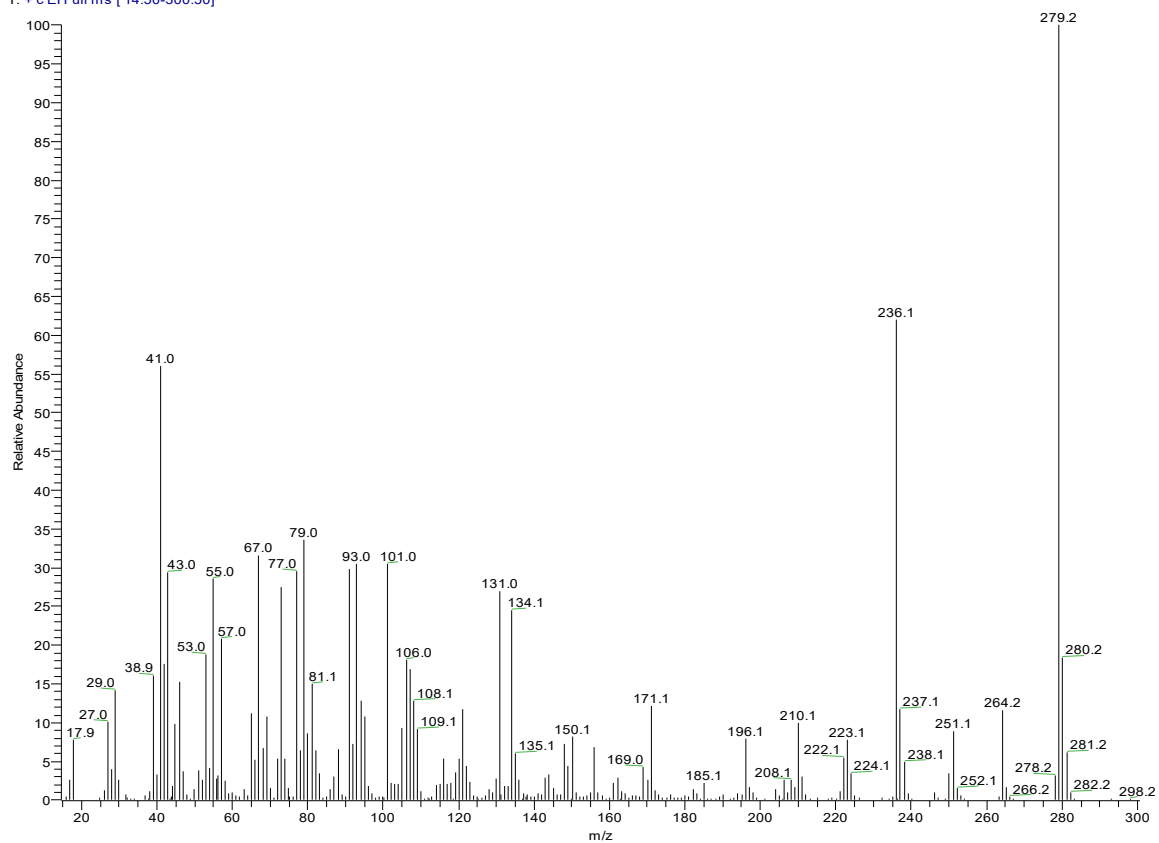

## 2.17. High Resolution Mass Spectra of Compound 4a

OV-58 #1 RT: 0.00 AV: 1 NL: 1.03E5  
T: + c EI Full ms [32.50-400.50]

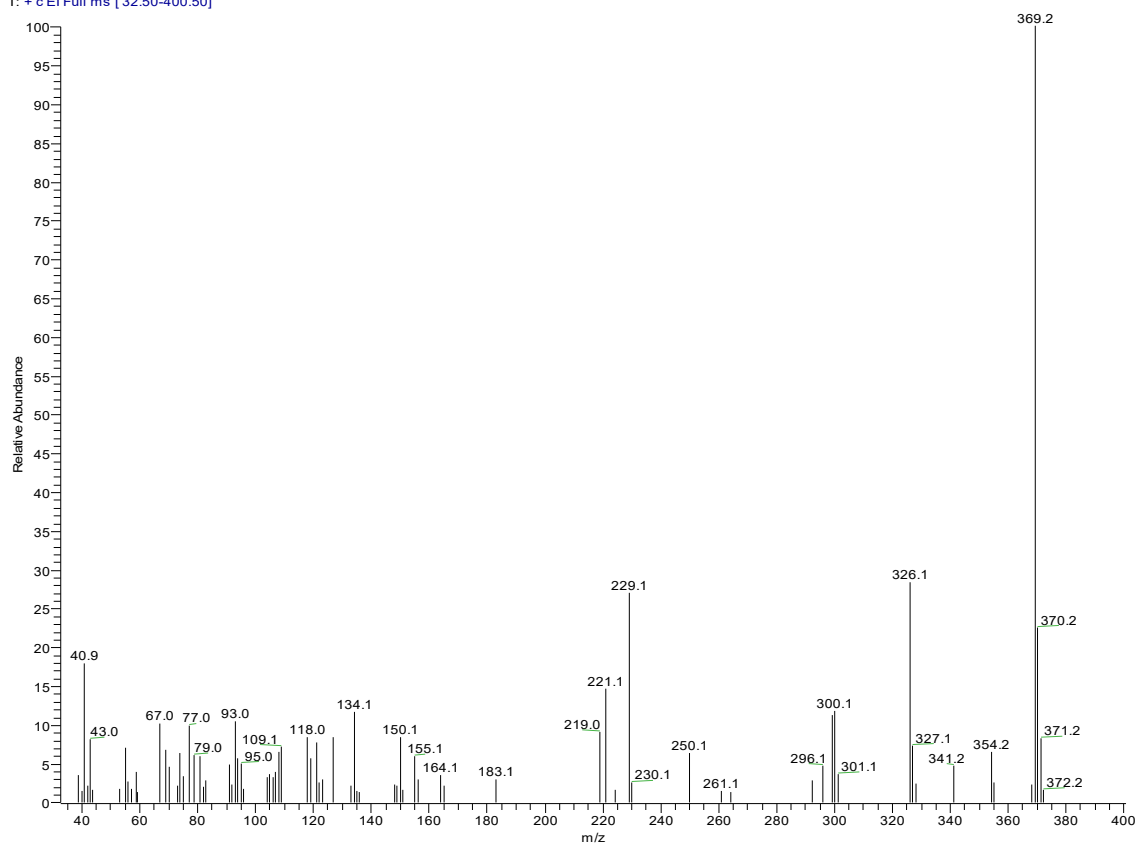

## 2.18. High Resolution Mass Spectra of Compound 4b

OV-57 #1 RT: 0.00 AV: 1 NL: 1.11E6  
T: + c EI Full ms [32.50-350.50]

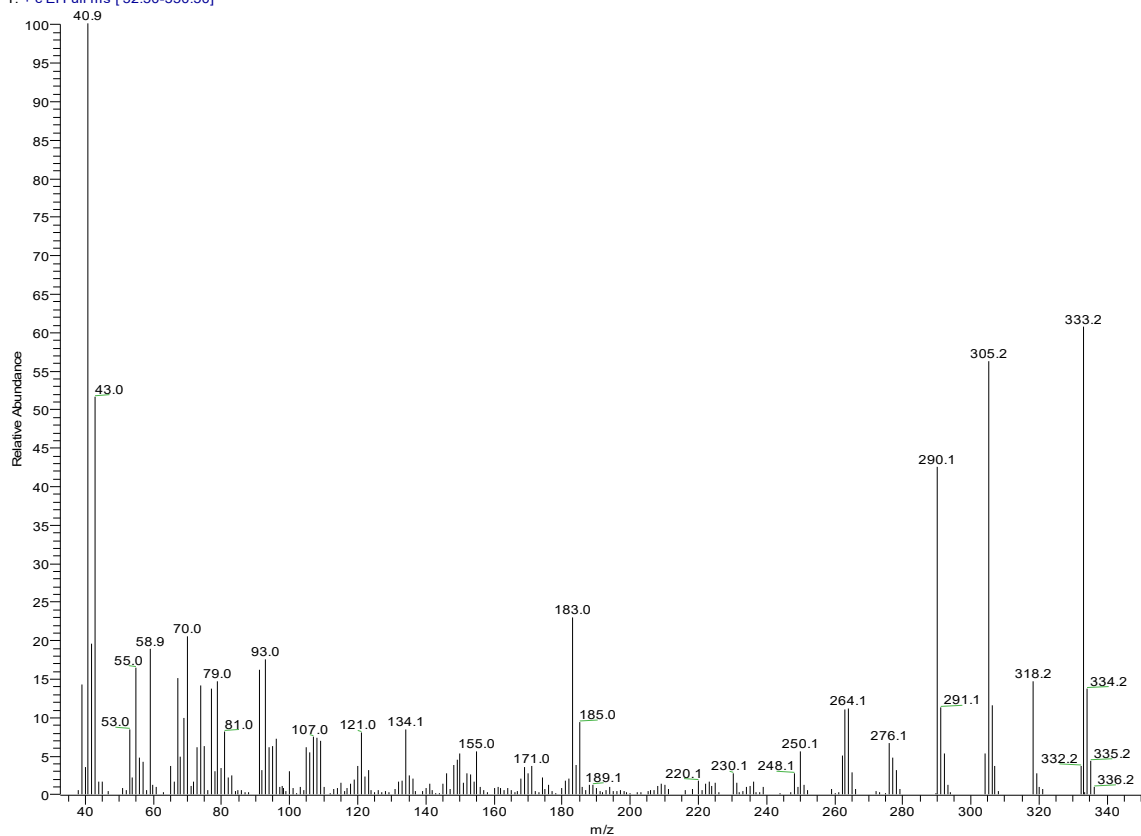

## 2.19. High Resolution Mass Spectra of Compound 4c

OV-59 #8 RT: 0.42 AV: 1 NL: 2.23E6  
T: + c EI Full ms [ 32.50-350.50]

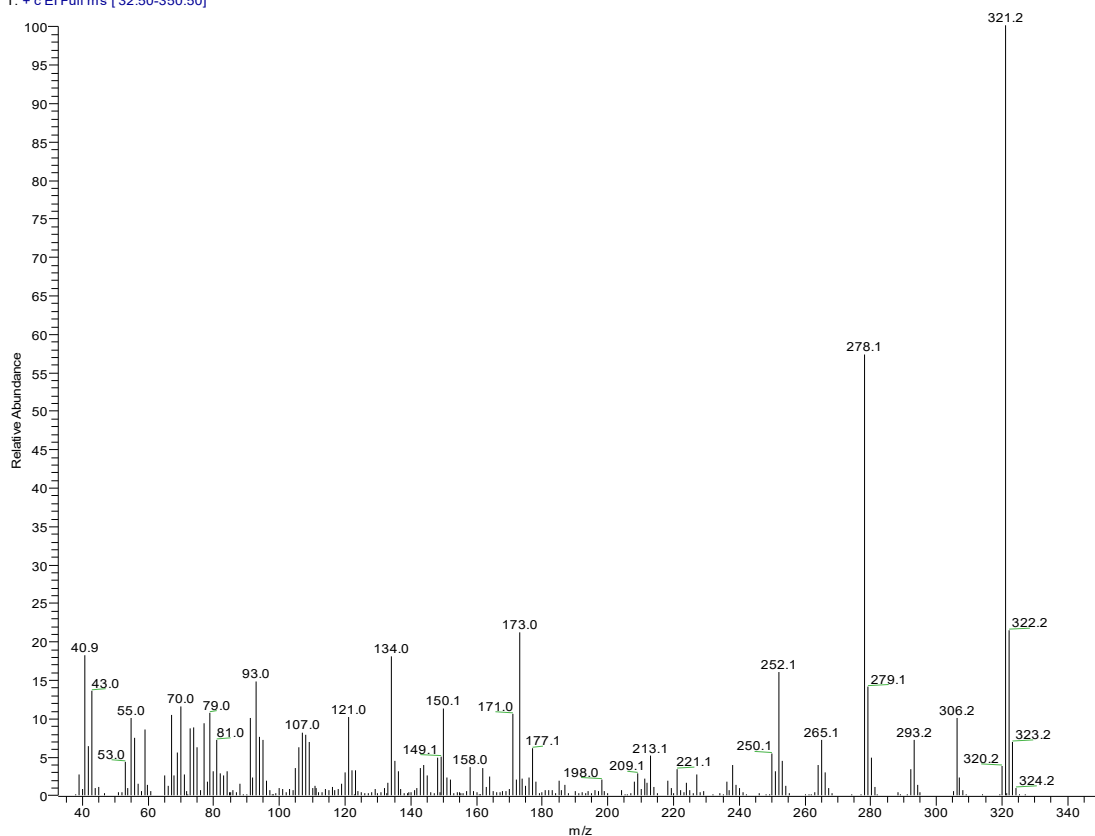

## 2.20. High Resolution Mass Spectra of Compound 4d

OV-52 #4 RT: 0.17 AV: 1 NL: 1.74E7  
T: + c EI Full ms [ 32.50-340.50]

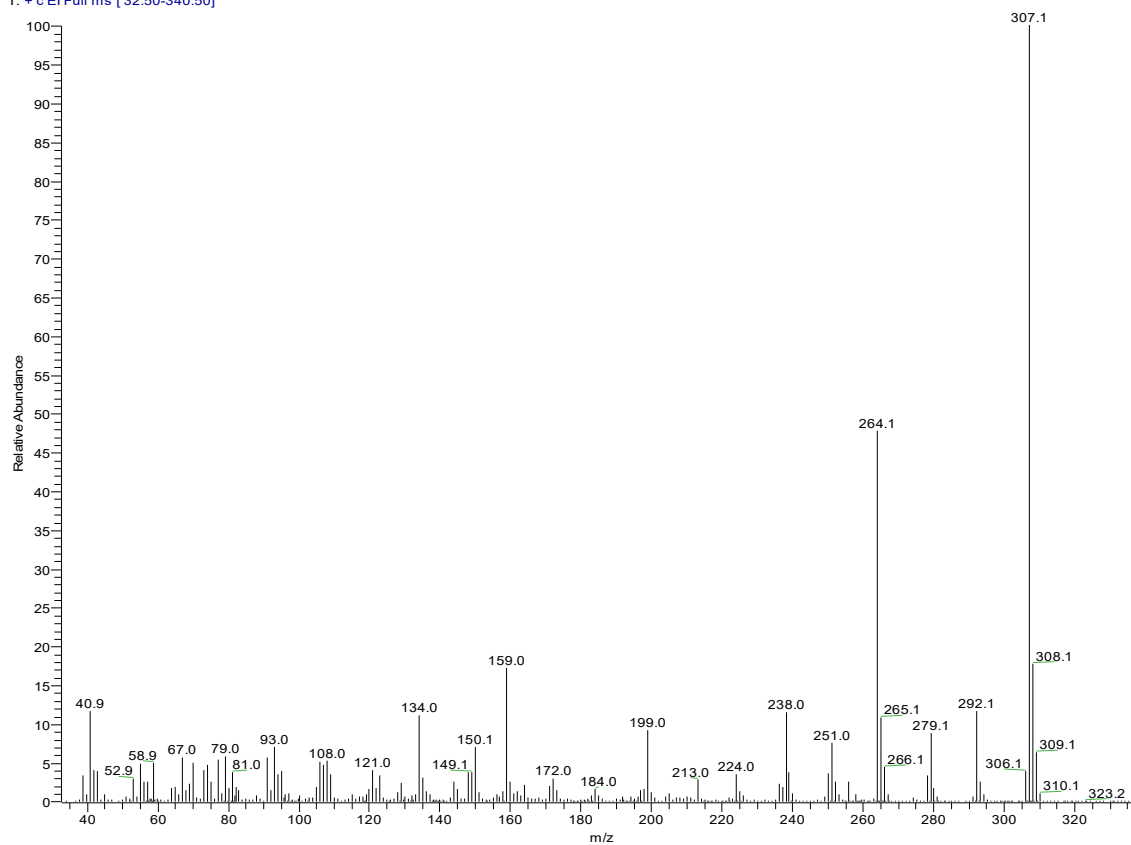

## 2.21. High Resolution Mass Spectra of Compound 5a

OV-40 #10 RT: 0.71 AV: 1 NL: 4.80E4  
T: + c EI Full ms [32.50-470.50]

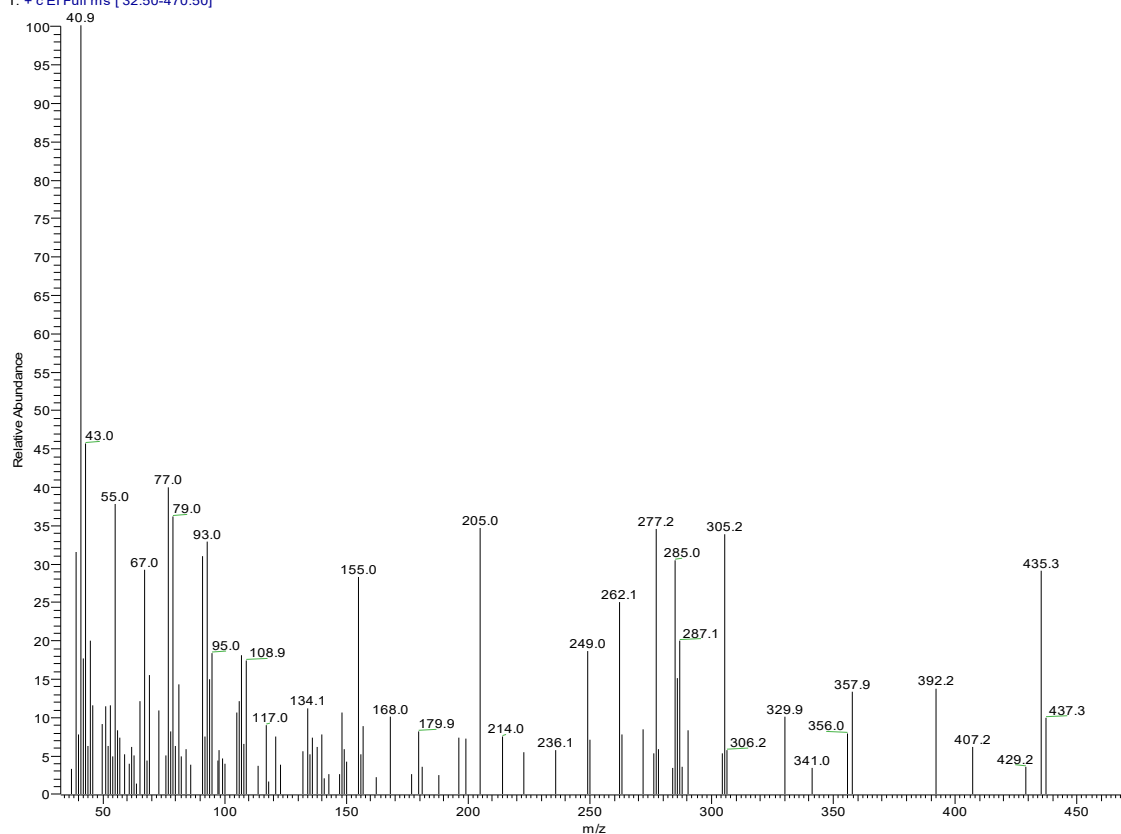

## 2.22. High Resolution Mass Spectra of Compound 5b

OV-41\_210225182304 #2 RT: 0.06 AV: 1 NL: 3.12E5  
T: + c EI Full ms [32.50-420.50]

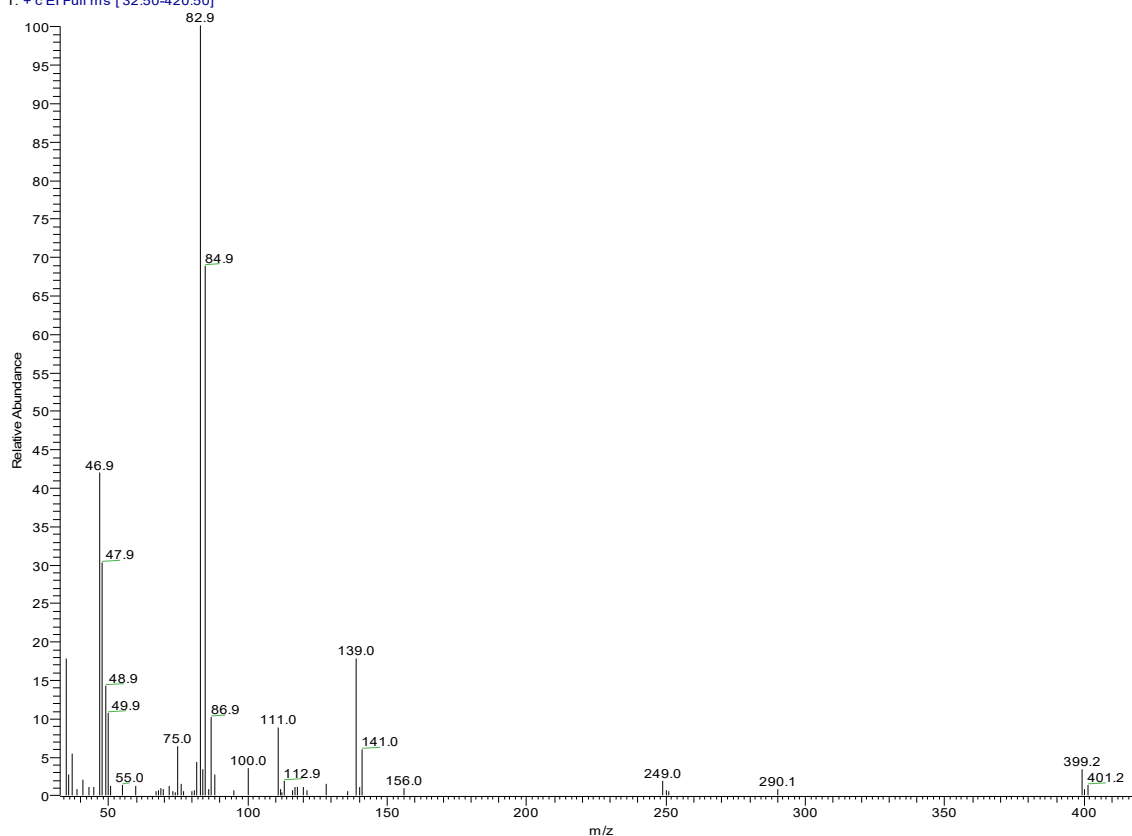



## 2.23. High Resolution Mass Spectra of Compound 5c

OV-44 #3 RT: 0.12 AV: 1 NL: 2.74E6  
T: + c EI Full ms [32.50-400.50]

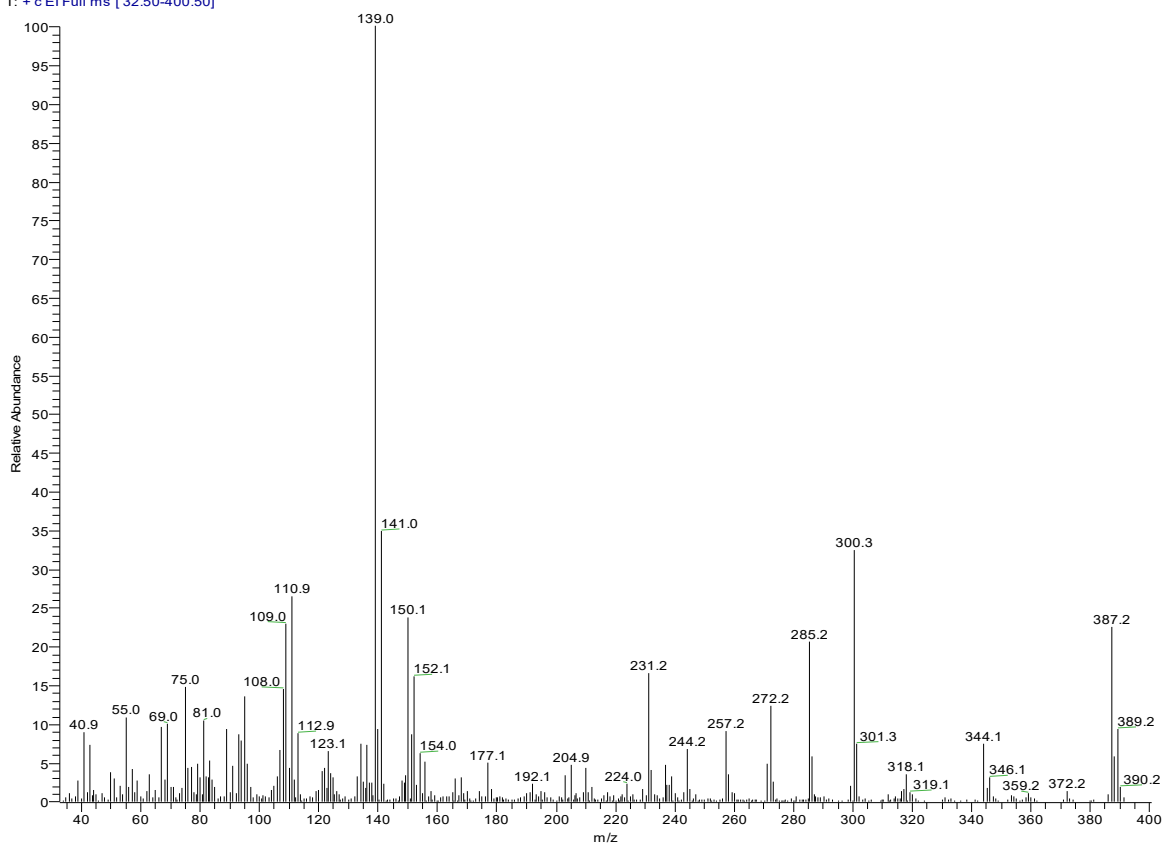

## 2.24. High Resolution Mass Spectra of Compound 5d

OV-42\_210225181236 #3 RT: 0.12 AV: 1 NL: 4.31E5  
T: + c EI Full ms [32.50-420.50]

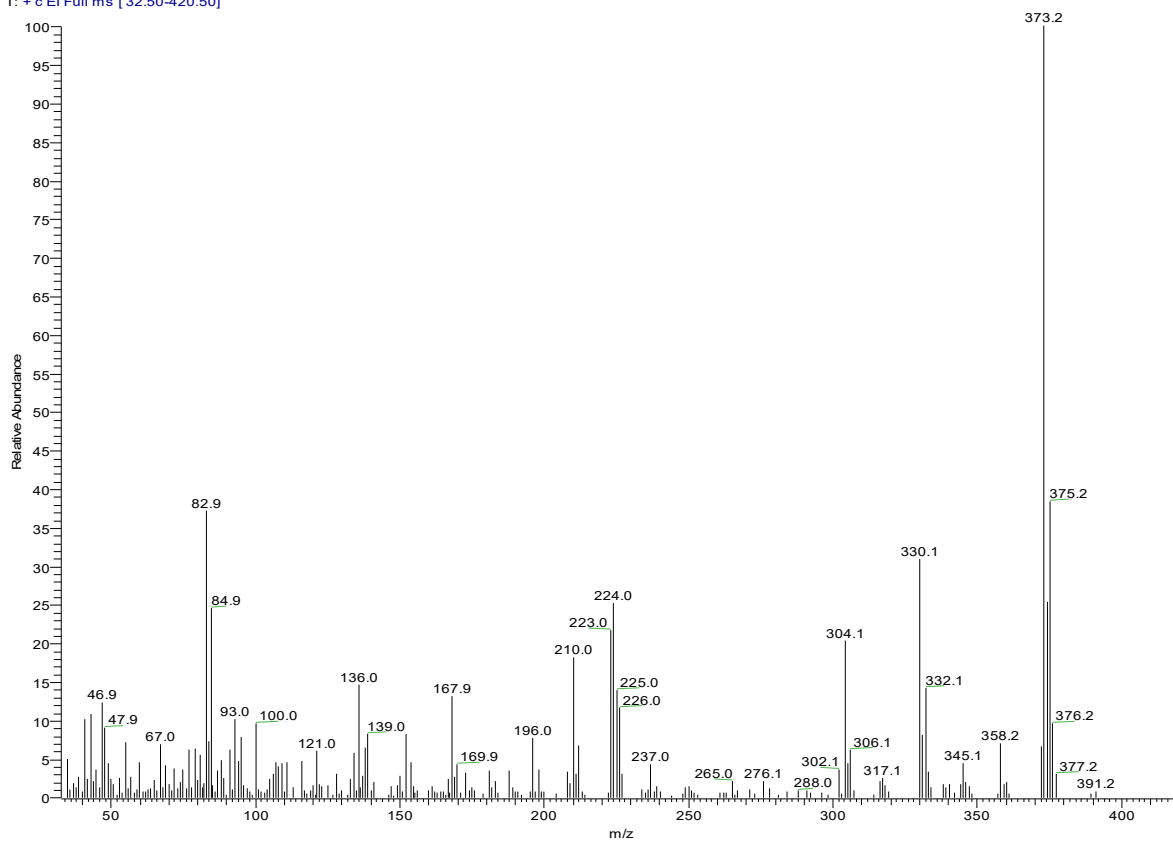

## 2.25. High Resolution Mass Spectra of Compound 6a

OV-47 #4 RT: 0.24 AV: 1 NL: 1.96E6  
T: + c EI Full ms [14.50-450.50]

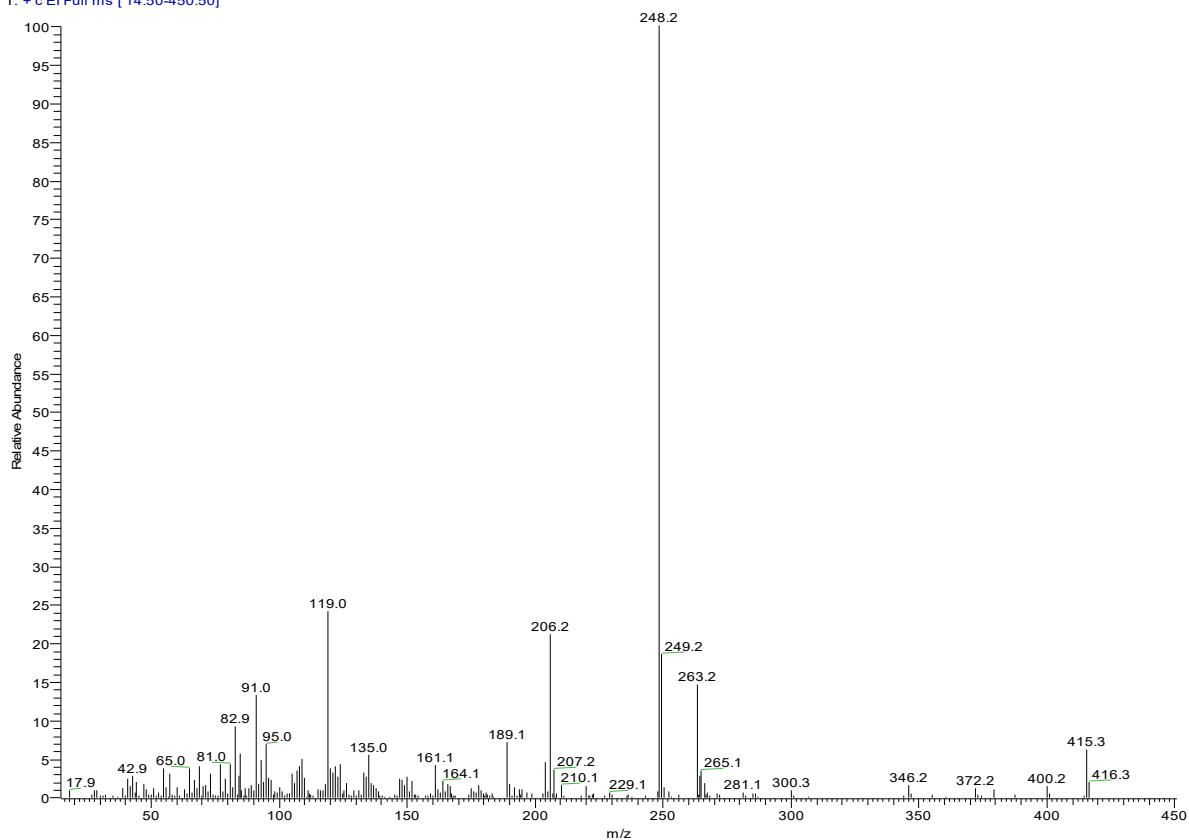

## 2.26. High Resolution Mass Spectra of Compound 6b

OV\_46\_#4 RT: 0.18 AV: 1 NL: 2.75E5  
T: + c EI Full ms [32.50-400.50]

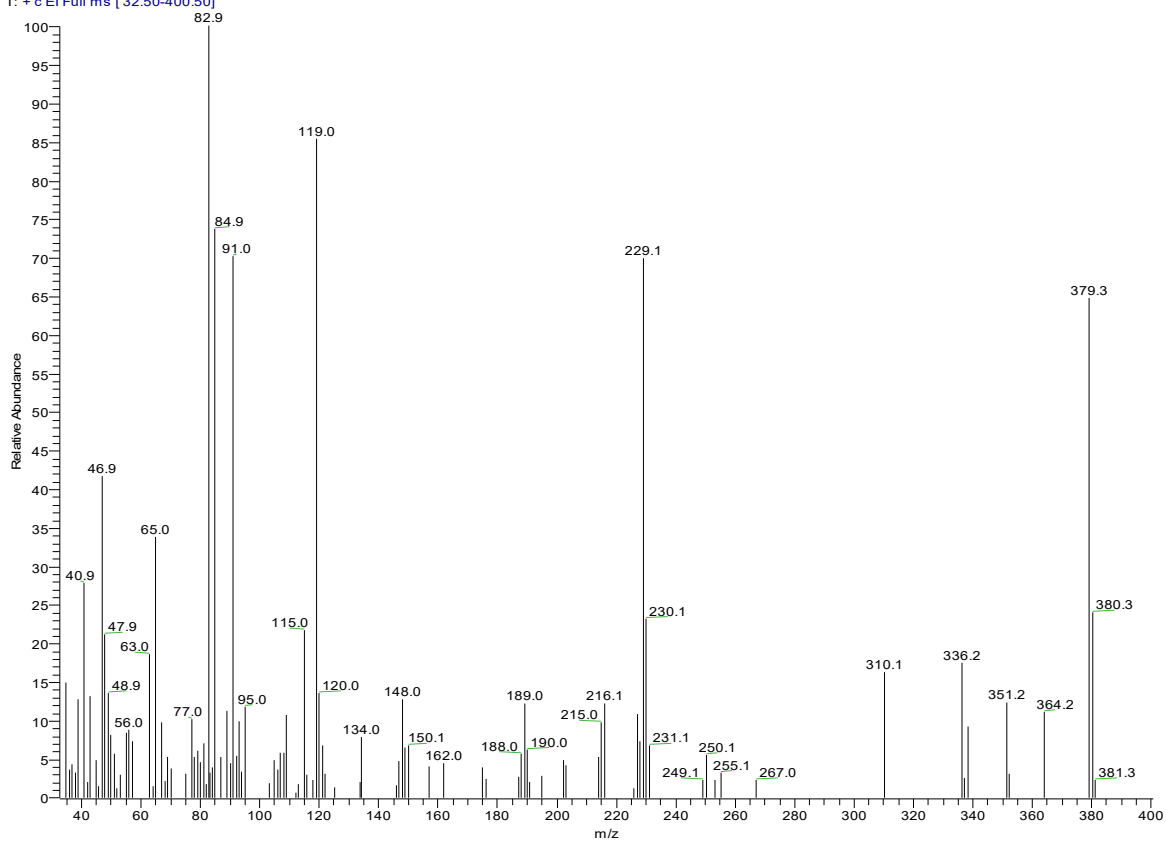

## 2.27. High Resolution Mass Spectra of Compound 6c

ov-50 #20 RT: 1.39 AV: 1 NL: 2.62E6  
T: + c EI Full ms [14.50-380.50]

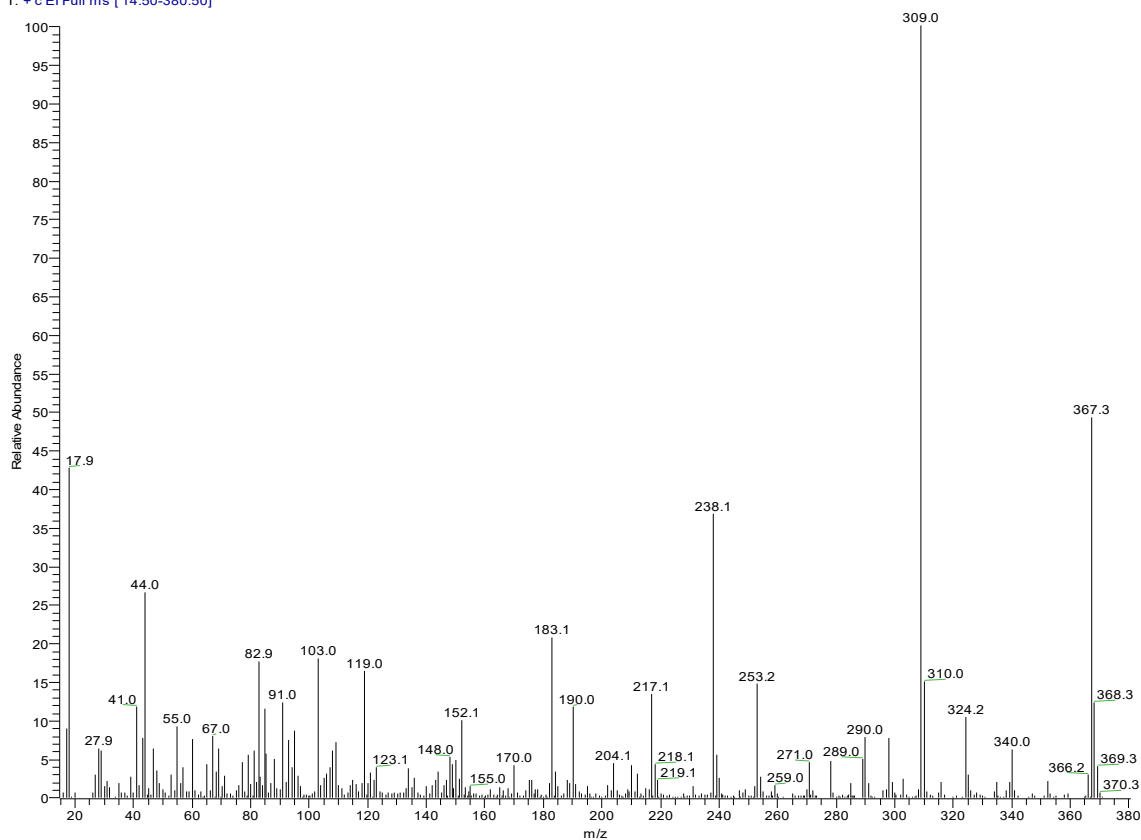

## 2.28. High Resolution Mass Spectra of Compound 6d

OV-45-pm #2 RT: 0.08 AV: 1 NL: 2.47E6  
T: + c EI Full ms [14.50-370.50]

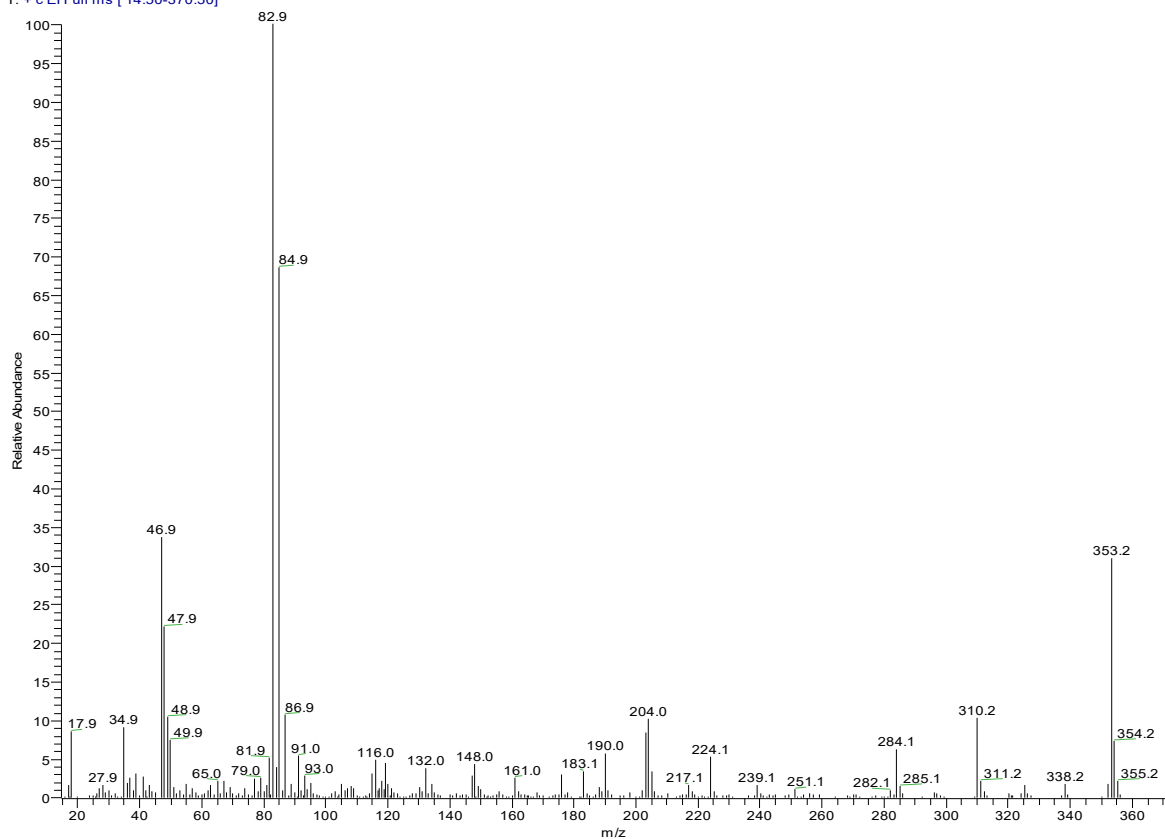

## 2.29. High Resolution Mass Spectra of Compound 7a

OV-53 #10 RT: 0.79 AV: 1 NL: 7.47E6  
T: + c EI Full ms [14.50-460.50]

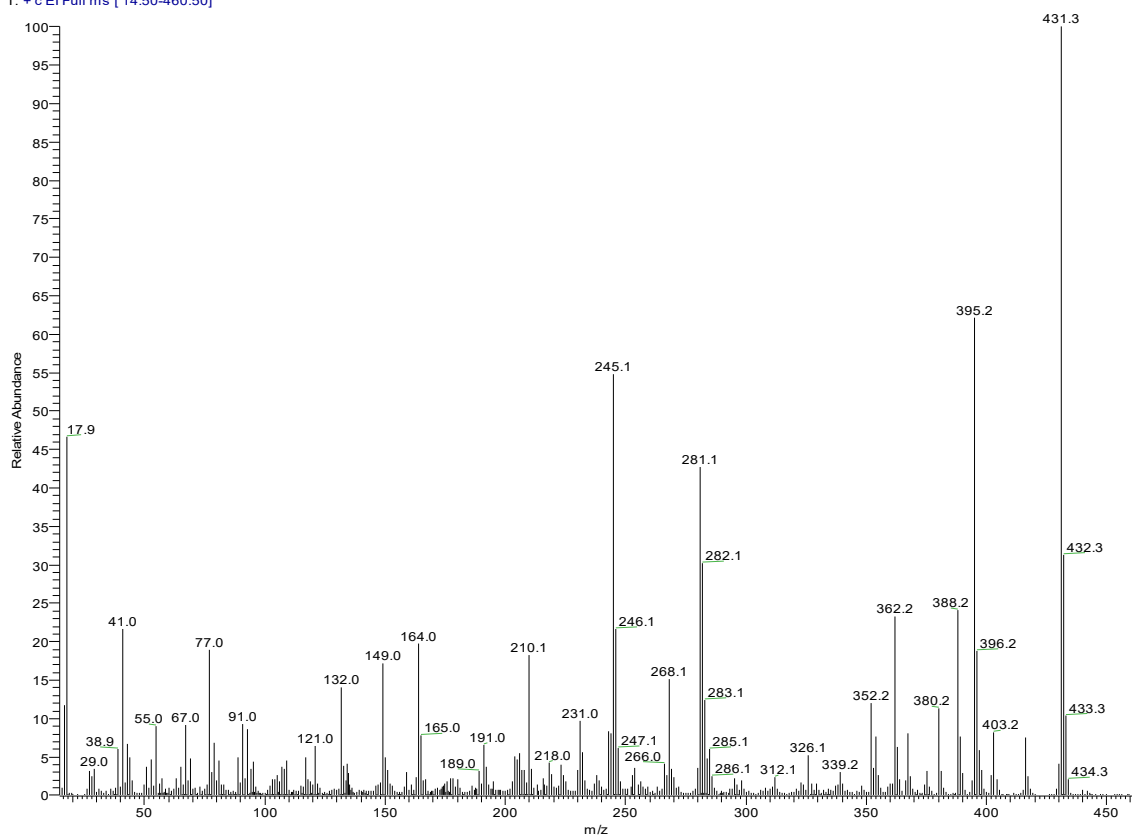

## 2.30. High Resolution Mass Spectra of Compound 7b

OV-54 #2 RT: 0.06 AV: 1 NL: 4.35E6  
T: + c EI Full ms [32.50-410.50]

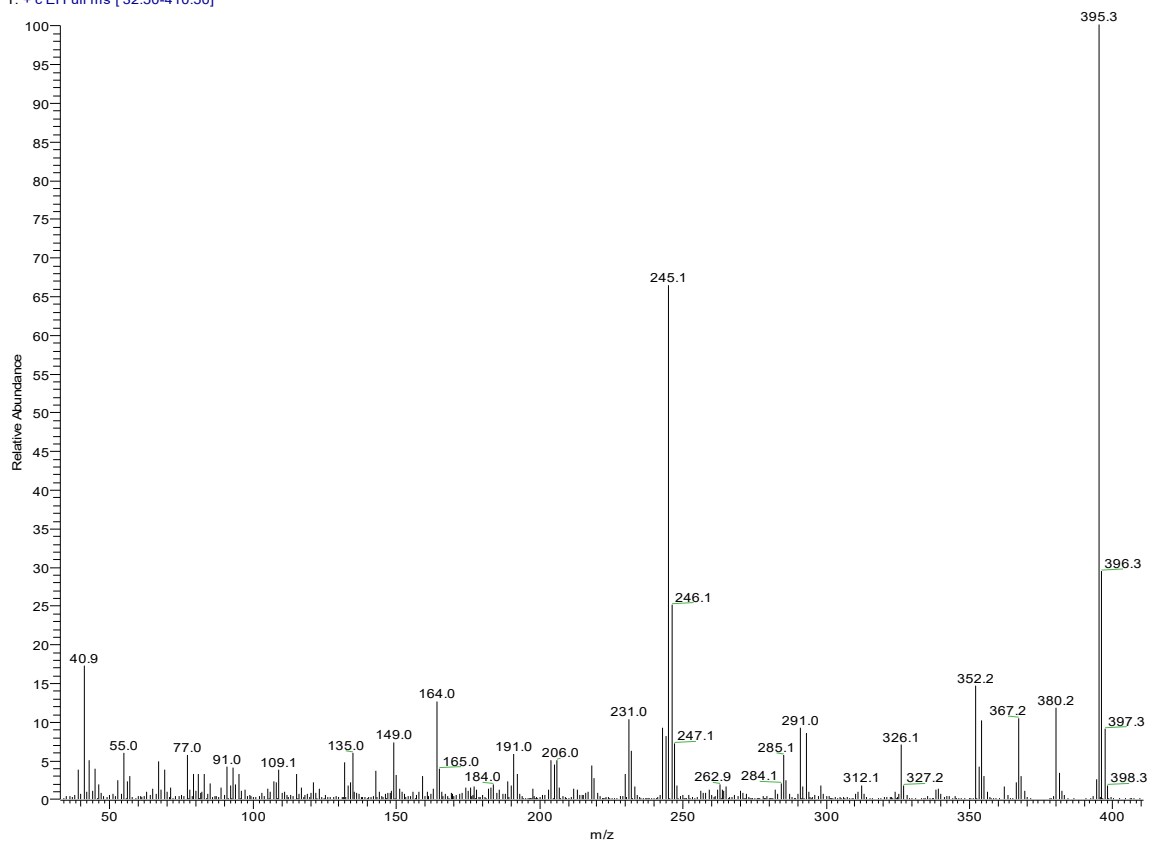

## 2.31. High Resolution Mass Spectra of Compound 7c

OV-55 #16 RT: 0.92 AV: 1 NL: 4.70E5  
T: + c EI Full ms [32.50-410.50]

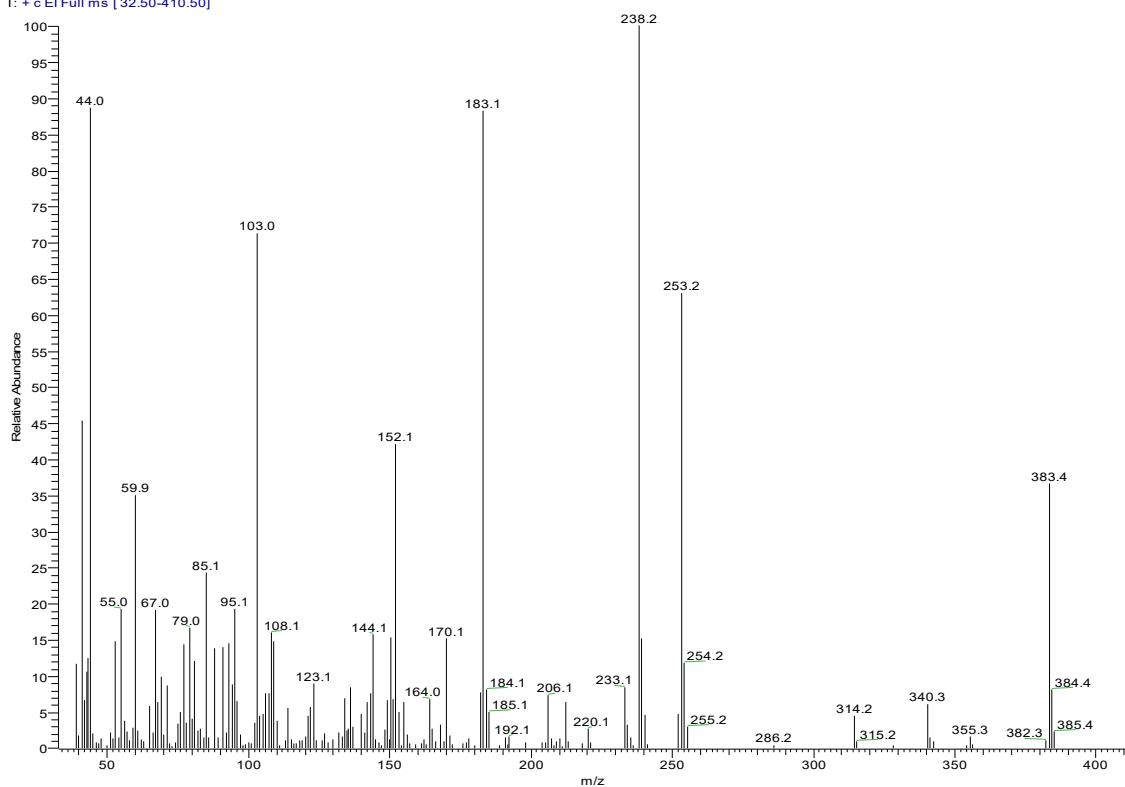

## 2.32. High Resolution Mass Spectra of Compound 7d

OV-56 #6 RT: 0.38 AV: 1 NL: 2.82E5  
T: + c EI Full ms [14.50-400.50]

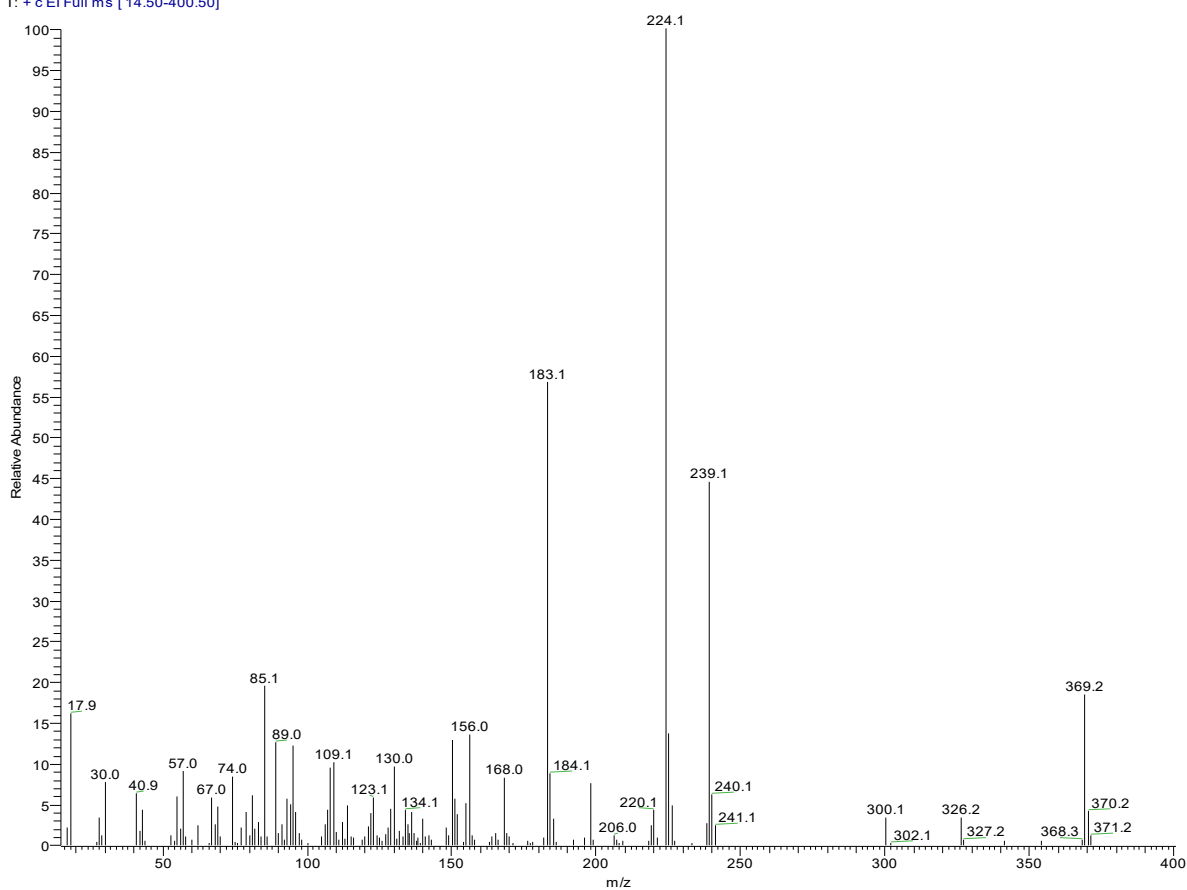

## 2.33. High Resolution Mass Spectra of Compound 8a

OV-28 #10 RT: 0.56 AV: 1 NL: 4.44E7  
T: + c EI Full ms [32.50-425.50]

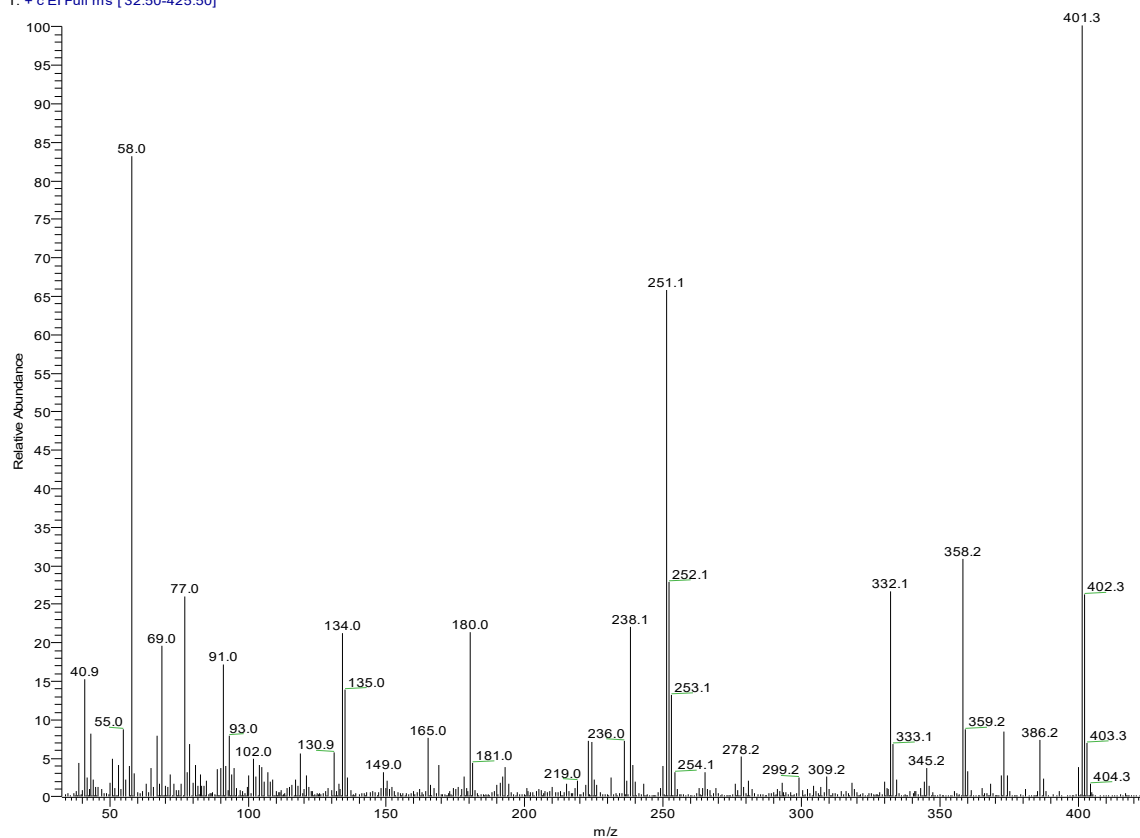

## 2.34. High Resolution Mass Spectra of Compound 8b

OV-31 #5 RT: 0.24 AV: 1 NL: 3.06E6  
T: + c EI Full ms [32.50-400.50]

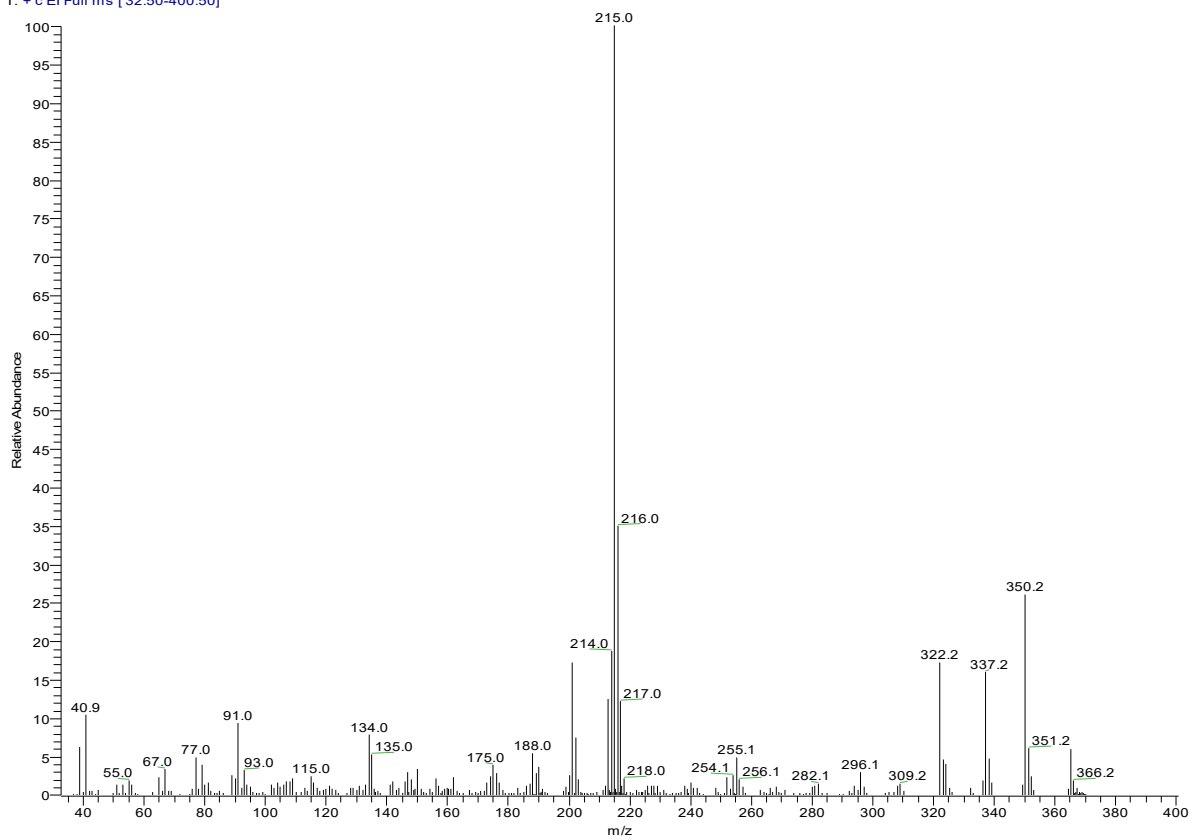

## 2.35. High Resolution Mass Spectra of Compound 8c

OV\_210225180658 #3 RT: 0.12 AV: 1 NL: 1.30E6  
T: + c EI Full ms [32.50-420.50]

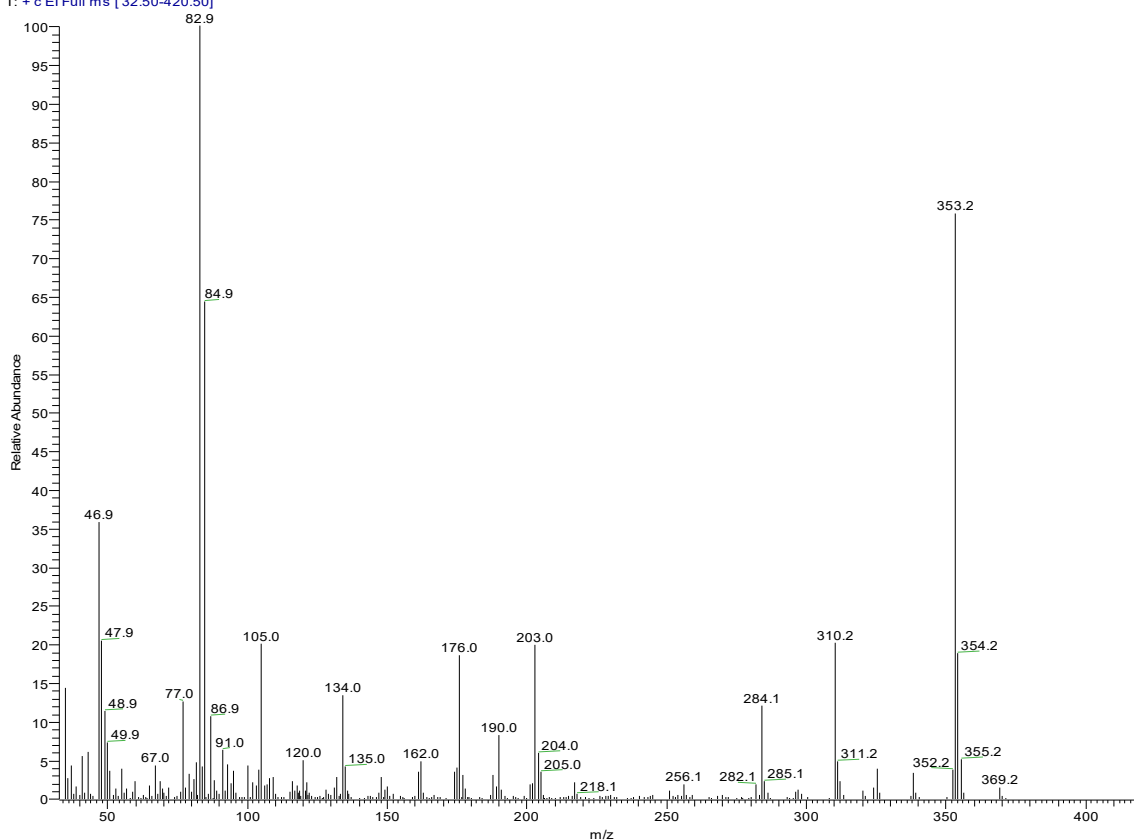

## 2.36. High Resolution Mass Spectra of Compound 8d

OV-32 #6 RT: 0.34 AV: 1 NL: 1.27E7  
T: + c EI Full ms [32.50-380.50]

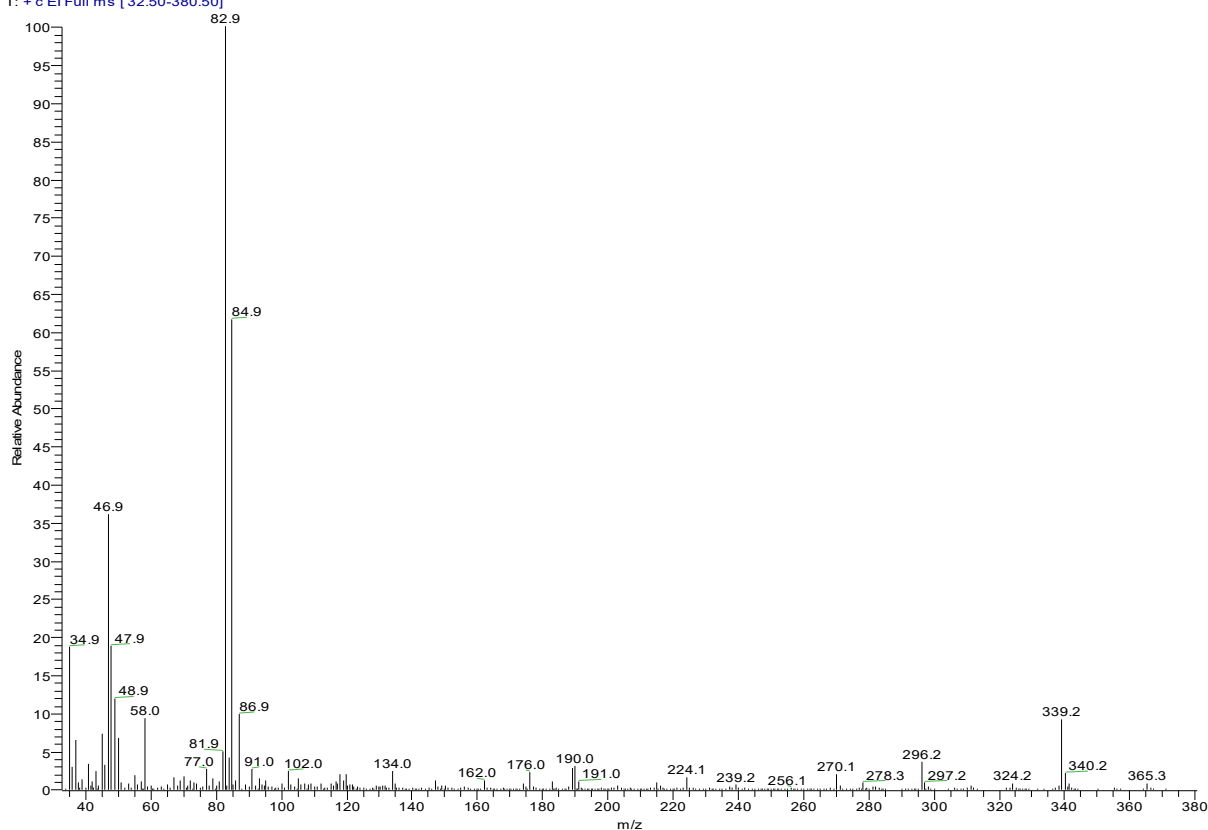

Supplement: s1 [file s1]
